# Supplementary material for: A copper-catalyzed multi-component reaction accessing fused imidazo-heterocycles via C–H functionalization
Source: Royal Society of Chemistry journal article supplement (doi:10.1039/c5ra09025c), 2015-01-01

## Supporting Information file

### An efficient and one-pot synthesis of fused imidazo-heterocycles via copper-catalyzed C–H functionalization

G. Santosh Kumar, S. Pushpa Ragini, A. Sanjeeva Kumar, H. M. Meshram\*

*Medicinal Chemistry and Pharmacology Division,  
Indian Institute of Chemical Technology, Hyderabad – 500 007, India.*

*Tel.: +91-40-27191640, Fax: +91-40-27193275, E-mail address- hmeshram@yahoo.com*

**General procedure for the synthesis of pyridin-2(1H)-ones 1:** A solution of 2-methoxy pyridines (1 mmol) in DMF (2 ml) was treated with lithium chloride (5 mmol) and pTSA (5 mmol), heated at 120 °C for 30 min, cooled to room temperature, quenched with water (5 ml), and extracted with ethyl acetate (2 X 5 ml). The combined extracts were washed with water (2 X 5 ml) and saturated aqueous brine (2 X 5 ml), dried (Na<sub>2</sub>SO<sub>4</sub>), and concentrated in vacuo to give the desired products pyridin-2(1H)-ones **1** in 99% yield.

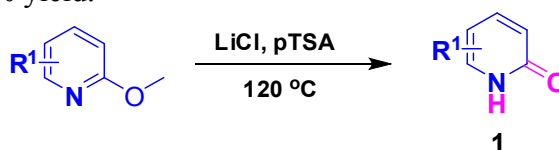

**General procedure for the synthesis of thiazol/benzo[d]thiazol-2(3H)-ones 5:**

A mixture of 2-bromothiazole/benzthiazole (20 mmol, 1.8 mL) and sodium hydroxide (60 mmol, 2.4 g) in tert-butyl alcohol (20 mL) was refluxed for overnight. After the reaction was complete, the solvent was removed in vacuo. The residue was dissolved in water (30 mL), acidified to pH 2 adding HCl (1 M) and extracted with EtOAc (3×30 mL). The organic phase was dried over Na<sub>2</sub>SO<sub>4</sub>, filtered and the solvent was removed in vacuo. The residue was purified by flash chromatography (hexanes – EtOAc) to yield the desired products thiazol/benzo[d]thiazol-2(3H)-ones **5** (80%).

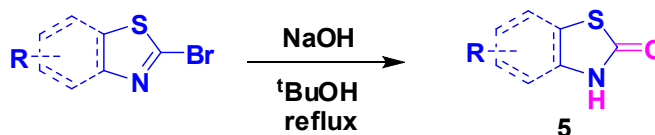

**General procedure for the synthesis of compounds (IHs) 4 or 6:** A sealed 10 mL glass tube containing acetophenone **2** and O-tosylhydroxylamine **3**, Cu(OTf)<sub>2</sub> (20 mol %), and 2 mL of [bmim]BF<sub>4</sub> was placed in the cavity of a microwave reactor and irradiated at 110 °C (temperature monitored by built in infrared sensor), power 150W and pressure 25–30 psi for 2 min. Then the pyridin-2(1H)-one or thiazol/benzo[d]thiazol-2(3H)-ones **1** or **5** was added to the reaction mixture at room temperature and subjected to microwave irradiation for 10 min at 110 °C. After completion of the reaction, the reaction mixture brought to room temperature and extracted with ether (2 X 5 ml). The organic layer was washed with brine solution and dried over Na<sub>2</sub>SO<sub>4</sub>. The combined organic layers were evaporated and purified through column chromatography (10%-20% ethyl acetate/petroleum ethers) to afford required products **4** or **6**. The residual ionic liquid containing copper triflate was dried under vacuum and reused for subsequent cycles. The obtained products were characterized by IR, NMR and mass spectroscopy.

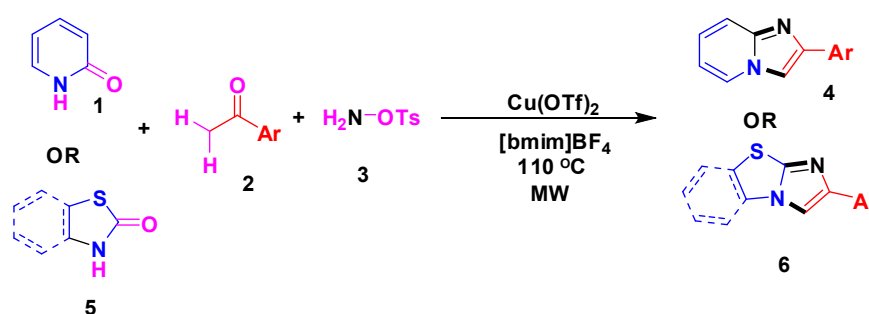

### Characterization Data of All Compounds

#### 2-phenylimidazo[1,2-a]pyridine (4a, Scheme 3)

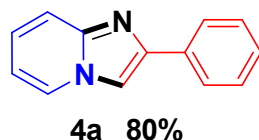

Light yellow solid; Mp 131-133 °C; <sup>1</sup>H NMR (300 MHz, CDCl<sub>3</sub>): δ 6.76 (td, *J* = 1.10 Hz, *J* = 6.94 Hz, 1H), 7.13-7.18 (m, 1H), 7.29 (tt, *J* = 1.22 Hz, *J* = 6.68 Hz, 1H), 7.43 (t, *J* = 7.70 Hz, 2H), 7.63 (dd, *J* = 0.73 Hz, *J* = 9.04 Hz, 1H), 7.84 (s, 1H), 7.94-7.98 (m, 2H), 8.09 (dt, *J* = 1.10 Hz, *J* = 6.84 Hz, 1H) ppm; <sup>13</sup>C NMR (75 MHz, CDCl<sub>3</sub>): δ 108.1, 112.3, 117.4, 124.5, 125.5, 125.9, 127.9, 128.6, 133.6, 145.6, 145.7 ppm; IR (KBr) ν = 520, 743, 1244, 1366, 1631, 2927 cm<sup>-1</sup>; MS-ESI: *m/z* = 195 [M+H]<sup>+</sup>; HRMS (ESI) calc. C<sub>13</sub>H<sub>11</sub>N<sub>2</sub> [M+H]<sup>+</sup>: 195.09190, found: 195.09146.

#### 2-(4-fluorophenyl)imidazo[1,2-a]pyridine (4b, Scheme 3)

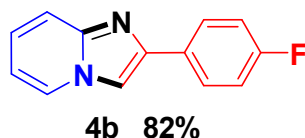

Light yellow solid; Mp 147-149 °C; <sup>1</sup>H NMR (300 MHz, CDCl<sub>3</sub>): δ 6.79 (t, *J* = 6.86 Hz, 1H), 7.13 (t, *J* = 8.54 Hz, 1H), 7.18 (t, *J* = 7.93 Hz, 1H), 7.63 (d, *J* = 9.00 Hz, 1H), 7.83 (s, 1H), 7.90-7.95 (m, 2H), 8.12 (d, *J* = 6.86 Hz, 2H) ppm; <sup>13</sup>C NMR (75 MHz, CDCl<sub>3</sub>): δ 107.7, 112.4, 115.5 (d, <sup>2</sup>*J*<sub>C-F</sub> = 21.9 Hz), 117.3, 124.7, 125.5, 127.8 (d, <sup>3</sup>*J*<sub>C-F</sub> = 8.2 Hz), 129.8 (d, <sup>4</sup>*J*<sub>C-F</sub> = 2.7 Hz), 145.4, 145.5,

162.6 (d,  $^1J_{C-F} = 246.9$  Hz) ppm; IR (KBr)  $\nu = 530, 742, 1239, 1745, 2928$   $\text{cm}^{-1}$ ; MS-ESI:  $m/z = 235$   $[\text{M}+\text{Na}]^+$ ; HRMS (ESI) calc.  $\text{C}_{13}\text{H}_{10}\text{N}_2\text{F}$   $[\text{M}+\text{H}]^+$ : 213.08280, found: 213.08157.

### 2-(4-chlorophenyl)imidazo[1,2-a]pyridine (4c, Scheme 3)

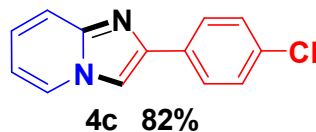

Light yellow solid; Mp 197-199 °C;  $^1\text{H}$  NMR (300 MHz,  $\text{CDCl}_3$ ):  $\delta$  6.79 (t,  $J = 6.71$  Hz, 1H), 7.18 (t,  $J = 8.24$  Hz, 1H), 7.40 (d,  $J = 8.24$  Hz, 2H), 7.62 (d,  $J = 9.00$  Hz, 1H), 7.83 (s, 1H), 7.88 (d,  $J = 9.00$  Hz, 2H), 8.10 (d,  $J = 6.71$  Hz, 1H) ppm;  $^{13}\text{C}$  NMR (75 MHz,  $\text{CDCl}_3$ ):  $\delta$  108.1, 112.6, 117.5, 124.9, 125.5, 127.2, 128.8, 132.2, 133.6, 144.6, 145.6 ppm; IR (KBr)  $\nu = 525, 741, 1244, 1470, 1659, 2911$   $\text{cm}^{-1}$ ; MS-ESI:  $m/z = 229$   $[\text{M}+1]^+$ ; HRMS (ESI) calc.  $\text{C}_{13}\text{H}_{10}\text{N}_2\text{Cl}$   $[\text{M}+\text{H}]^+$ : 229.05325, found: 229.05190.

### 2-(4-bromophenyl)imidazo[1,2-a]pyridine (4d, Scheme 3)

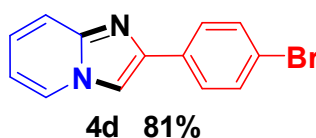

White solid; Mp 206-208 °C;  $^1\text{H}$  NMR (300 MHz,  $\text{CDCl}_3$ ):  $\delta$  6.76 (t,  $J = 7.2$  Hz, 1H), 7.15–7.20 (m, 1H), 7.53 (d,  $J = 8.6$  Hz, 2H), 7.61 (d,  $J = 9.6$  Hz, 1H), 7.78 – 7.84 (m, 3H), 8.09 (d,  $J = 6.8$  Hz, 1H) ppm;  $^{13}\text{C}$  NMR (75 MHz,  $\text{CDCl}_3$ ):  $\delta$  108.1, 112.6, 117.5, 121.8, 124.9, 125.5, 127.5, 131.8, 132.6, 144.6, 145.7 ppm; IR (KBr)  $\nu = 542, 741, 1244, 1465, 1741, 2924$   $\text{cm}^{-1}$ ; MS-ESI:  $m/z = 273$   $[\text{M}+\text{H}]^+$ ; HRMS (ESI) calc.  $\text{C}_{13}\text{H}_{10}\text{N}_2\text{Br}$   $[\text{M}+\text{H}]^+$ : 273.00274, found: 287.00124.

### 7-methyl-2-phenylimidazo[1,2-a]pyridine (4e, Scheme 3)

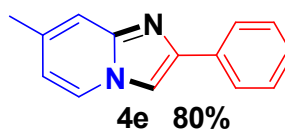

White solid; Mp 160-162 °C;  $^1\text{H}$  NMR (300 MHz,  $\text{CDCl}_3$ ):  $\delta$  2.40 (s, 3H), 6.61 (dd,  $J = 1.37$  Hz,  $J = 7.01$  Hz, 1H), 7.32 (tt,  $J = 1.22$  Hz,  $J = 6.25$  Hz, 1H), 7.39 (s, 1H), 7.43 (t,  $J = 7.62$  Hz, 2H), 7.78 (s, 1H), 7.94 (d,  $J = 7.17$  Hz, 2H), 7.99 (d,  $J = 7.01$  Hz, 2H) ppm;  $^{13}\text{C}$  NMR (75 MHz,  $\text{CDCl}_3$ ):  $\delta$  21.3, 107.4, 115.0, 115.8, 124.7, 125.9, 127.7, 128.6, 133.8, 135.5, 145.4, 146.0 ppm; IR (KBr)  $\nu = 600, 719, 783, 1025, 1072, 1361, 1436, 1470, 1501, 1639$   $\text{cm}^{-1}$ ; MS-ESI:  $m/z = 209$   $[\text{M}+\text{H}]^+$ ; HRMS (ESI) calc.  $\text{C}_{14}\text{H}_{13}\text{N}_2$   $[\text{M}+\text{H}]^+$ : 209.10787, found: 209.10663.

### 2-(4-fluorophenyl)-7-methylimidazo[1,2-a]pyridine (4f, Scheme 3)

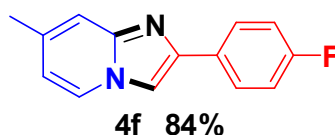

White solid; Mp 148-150 °C; <sup>1</sup>H NMR (300 MHz, CDCl<sub>3</sub>): δ 2.40 (s, 3H), 6.33 (s, 1H), 6.48 (d, *J* = 3.66 Hz, 1H), 6.60 (d, *J* = 6.71 Hz, 1H), 7.11 (td, *J* = 1.83 Hz, *J* = 8.85 Hz, 2H), 7.37 (s, 1H), 7.72 (s, 1H), 7.97-8.00 (m, 1H) ppm; <sup>13</sup>C NMR (75 MHz, CDCl<sub>3</sub>): δ 21.3, 107.1, 115.1, 115.5 (d, <sup>2</sup>*J*<sub>C-F</sub> = 21.7 Hz), 115.7, 124.7, 127.5 (d, <sup>3</sup>*J*<sub>C-F</sub> = 8.1 Hz), 130.0 (d, <sup>4</sup>*J*<sub>C-F</sub> = 2.7 Hz), 135.7, 144.5, 146.1, 162.5 (d, <sup>1</sup>*J*<sub>C-F</sub> = 247.0 Hz), ppm; IR (KBr) ν = 526, 784, 1022, 1173, 1249, 1472, 1584 cm<sup>-1</sup>; MS-ESI: *m/z* = 227 [M+H]<sup>+</sup>; HRMS (ESI) calc. C<sub>14</sub>H<sub>12</sub>N<sub>2</sub>F [M+H]<sup>+</sup>: 227.09845, found: 227.09718.

### 2-(4-bromophenyl)-7-methylimidazo[1,2-a]pyridine (4g, Scheme 3)

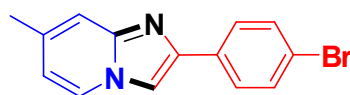

4g 82%

White solid; Mp 206-208 °C; <sup>1</sup>H NMR (300 MHz, CDCl<sub>3</sub>): δ 2.39 (s, 3H), 6.67 (dd, *J* = 1.37 Hz, *J* = 6.86 Hz, 1H), 7.36 (s, 1H), 7.53 (d, *J* = 8.54 Hz, 2H), 7.74 (s, 1H), 7.79 (d, *J* = 8.54 Hz, 2H), 7.96 (d, *J* = 6.86 Hz, 1H) ppm; <sup>13</sup>C NMR (75 MHz, CDCl<sub>3</sub>): δ 21.3, 107.6, 115.2, 115.8, 121.6, 124.7, 127.4, 131.7, 132.7, 135.9, 144.2, 146.0 ppm; IR (KBr): ν = 504, 732, 784, 824, 1005, 1066, 1249, 1369, 1472, 1642 cm<sup>-1</sup>; MS-ESI: *m/z* = 287 [M+H]<sup>+</sup>; HRMS (ESI) calc. C<sub>14</sub>H<sub>12</sub>N<sub>2</sub>Br [M+H]<sup>+</sup>: 287.01839, found: 287.01682.

### 7-methyl-2-p-tolylimidazo[1,2-a]pyridine (4h, Scheme 3)

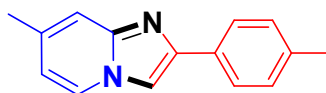

4h 76%

White solid; Mp 146-148 °C; <sup>1</sup>H NMR (300 MHz, CDCl<sub>3</sub>): δ 2.37 (s, 6H), 6.56 (dd, *J* = 0.94 Hz, *J* = 7.93 Hz, 1H), 7.23 (d, *J* = 7.93 Hz, 2H), 7.35 (s, 1H), 7.69 (s, 1H), 7.82 (d, *J* = 8.12 Hz, 2H), 7.93 (d, *J* = 6.79 Hz, 1H) ppm; <sup>13</sup>C NMR (75 MHz, CDCl<sub>3</sub>): δ 21.2, 21.3, 107.0, 114.8, 115.7, 124.6, 125.8, 129.3, 131.0, 135.3, 137.5, 145.6, 146.0 ppm; IR (KBr) ν = 522, 780, 1017, 1169, 1242, 1480, 1601 cm<sup>-1</sup>; MS-ESI: *m/z* = 223 [M+H]<sup>+</sup>; HRMS (ESI) calc. C<sub>15</sub>H<sub>15</sub>N<sub>2</sub> [M+H]<sup>+</sup>: 223.12352, found: 223.12231.

### 2-(4-methoxyphenyl)-7-methylimidazo[1,2-a]pyridine (4i, Scheme 3)

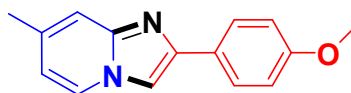

4i 74%

White solid; Mp 163-165 °C; <sup>1</sup>H NMR (300 MHz, CDCl<sub>3</sub>): δ 2.40 (s, 3H), 3.85 (s, 3H), 6.48 (d, *J* = 5.09 Hz, 1H), 6.59 (dd, *J* = 1.13 Hz, *J* = 6.79 Hz, 1H), 6.96 (d, *J* = 8.68 Hz, 2H), 7.70 (s, 1H), 7.86 (d, *J* = 8.87 Hz, 2H), 7.97 (d, *J* = 6.79 Hz, 1H) ppm; <sup>13</sup>C NMR (75 MHz, CDCl<sub>3</sub>): δ 21.3, 55.2, 106.5, 114.0, 115.6, 115.6, 124.5, 126.6, 127.1, 135.3, 145.4, 146.0, 159.4 ppm; IR (KBr) ν = 525, 782, 1020, 1172, 1245, 1483, 1606 cm<sup>-1</sup>; MS-ESI: *m/z* = 239 [M+H]<sup>+</sup>; HRMS (ESI) calc. C<sub>15</sub>H<sub>15</sub>N<sub>2</sub>O [M+H]<sup>+</sup>: 239.11844, found: 239.11697.

### 6-methyl-2-phenylimidazo[1,2-a]pyridine (4j, Scheme 3)

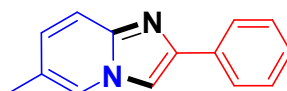

**4j 74%**

White solid; Mp 172-174 °C; <sup>1</sup>H NMR (300 MHz, CDCl<sub>3</sub>): δ 2.31 (s, 3H), 7.01 (dd, *J* = 1.52 Hz, *J* = 9.15 Hz, 1H), 7.31 (t, *J* = 9.15 Hz, 1H), 7.42 (t, *J* = 1.52 Hz, 2H), 7.53 (d, *J* = 9.15 Hz, 1H), 7.76 (s, 1H), 7.88 (s, 1H), 7.94 (d, *J* = 8.54 Hz, 2H) ppm; <sup>13</sup>C NMR (75 MHz, CDCl<sub>3</sub>): δ 18.0, 107.8, 116.6, 121.9, 123.2, 125.8, 127.7, 128.6, 129.8, 133.7, 144.6, 145.3 ppm; IR (KBr) ν = 508, 704, 730, 798, 820, 1413, 1501, 1621 cm<sup>-1</sup>; MS-ESI: *m/z* = 209 [M+H]<sup>+</sup>; HRMS (ESI) calc. C<sub>14</sub>H<sub>13</sub>N<sub>2</sub> [M+H]<sup>+</sup>: 209.10732, found: 209.10684.

### 2-(4-fluorophenyl)-7-methylimidazo[1,2-a]pyridine (4k, Scheme 3)

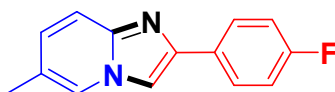

**4k 77%**

White solid; Mp 192-194 °C; <sup>1</sup>H NMR (300 MHz, CDCl<sub>3</sub>): δ 2.32 (s, 3H), 7.02 (dd, *J* = 1.37 Hz, *J* = 6.86 Hz, 1H), 7.11 (td, *J* = 7.29 Hz, *J* = 7.29 Hz, 2H), 7.52 (t, *J* = 7.29 Hz, 1H), 7.71 (d, *J* = 7.29 Hz, 1H), 7.88-7.92 (m, 3H) ppm; <sup>13</sup>C NMR (75 MHz, CDCl<sub>3</sub>): δ 18.0, 107.4, 115.5 (d, <sup>2</sup>*J*<sub>C-F</sub> = 21.7 Hz), 116.7, 122.0, 123.2, 127.5 (d, <sup>3</sup>*J*<sub>C-F</sub> = 8.1 Hz), 127.9, 130.1 (d, <sup>4</sup>*J*<sub>C-F</sub> = 21.7 Hz), 144.6, 144.7, 162.5 (d, <sup>1</sup>*J*<sub>C-F</sub> = 21.7 Hz) ppm; IR (KBr) ν = 522, 703, 736, 805, 840, 1087, 1150, 1221, 1481, 1601 cm<sup>-1</sup>; MS-ESI: *m/z* = 227 [M+H]<sup>+</sup>; HRMS (ESI) calc. C<sub>14</sub>H<sub>12</sub>N<sub>2</sub>F [M+H]<sup>+</sup>: 227.09790, found: 227.09757.

### 2-(4-chlorophenyl)-6-methylimidazo[1,2-a]pyridine (4l, Scheme 3)

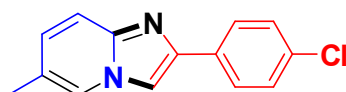

**4l 77%**

White solid; Mp 212-214 °C; <sup>1</sup>H NMR (300 MHz, CDCl<sub>3</sub>): δ 2.32 (s, 3H), 7.03 (dd, *J* = 1.51 Hz, *J* = 9.06 Hz, 1H), 7.39 (d, *J* = 8.49 Hz, 2H), 7.52 (d, *J* = 9.25 Hz, 1H), 7.76 (s, 1H), 7.84-7.91 (m, 3H) ppm; <sup>13</sup>C NMR (75 MHz, CDCl<sub>3</sub>): δ 18.0, 107.8, 116.8, 122.1, 123.2, 127.0, 128.0, 128.8, 132.4, 133.4, 144.3, 144.7 ppm; IR (KBr) ν = 510, 733, 803, 834, 1091, 1207, 1414, 1469, 1539 cm<sup>-1</sup>; MS-ESI: *m/z* = 243 [M+H]<sup>+</sup>; HRMS (ESI) calc. C<sub>14</sub>H<sub>12</sub>N<sub>2</sub>Cl [M+H]<sup>+</sup>: 243.06835, found: 287.06834.

### 2-(4-bromophenyl)-6-methylimidazo[1,2-a]pyridine (4m, Scheme 3)

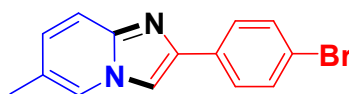

**4m 75%**

White solid; Mp 212-214 °C;; <sup>1</sup>H NMR (300 MHz, CDCl<sub>3</sub>): δ 2.32 (s, 3H), 7.03 (dd, *J* = 1.52 Hz, *J* = 9.15 Hz, 1H), 7.50-7.56 (m, 3H), 7.76 (s, 1H), 7.81 (d, *J* = 8.54 Hz, 2H), 7.89 (s, 1H) ppm; <sup>13</sup>C NMR (75 MHz, CDCl<sub>3</sub>): δ 18.1, 107.9, 116.7, 121.6, 122.2, 123.2, 127.4, 131.7, 132.8, 144.3, 144.7 ppm; IR (KBr) ν = 505, 728, 808, 838, 1096, 1213, 1421, 1482, 1547 cm<sup>-1</sup>; MS-ESI: *m/z* = 287 [M+H]<sup>+</sup>; HRMS (ESI) calc. C<sub>14</sub>H<sub>12</sub>N<sub>2</sub>Br [M+H]<sup>+</sup>: 287.01784, found: 287.01757.

### 6-methyl-2-p-tolylimidazo[1,2-a]pyridine (4n, Scheme 3)

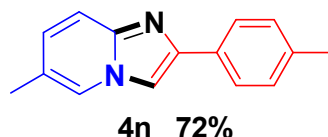

White solid; Mp 202-204 °C; <sup>1</sup>H NMR (300 MHz, CDCl<sub>3</sub>): δ 2.31 (s, 3H), 2.38 (s, 3H), 7.00 (dd, *J* = 1.37 Hz, *J* = 9.15 Hz, 1H), 7.23 (d, *J* = 8.08 Hz, 2H), 7.52 (d, *J* = 9.15 Hz, 1H), 7.74 (s, 1H), 7.83 (d, *J* = 8.08 Hz, 2H), 7.88 (s, 1H) ppm; <sup>13</sup>C NMR (75 MHz, CDCl<sub>3</sub>): δ 18.0, 21.2, 107.4, 116.5, 121.8, 123.2, 125.7, 127.6, 129.3, 130.9, 137.5, 144.5, 145.4 ppm; IR (KBr) ν = 510, 706, 733, 802, 824, 1417, 1510, 1603 cm<sup>-1</sup>; MS-ESI: *m/z* = 223 [M+H]<sup>+</sup>, 245 [M+Na]<sup>+</sup>; HRMS (ESI) calc. C<sub>15</sub>H<sub>15</sub>N<sub>2</sub> [M+H]<sup>+</sup>: 223.12358, found: 223.12290 and calc. C<sub>15</sub>H<sub>15</sub>N<sub>2</sub> [M+Na]<sup>+</sup>: 245.10540, found: 223.10476.

### 2-(4-methoxyphenyl)-6-methylimidazo[1,2-a]pyridine (4o, Scheme 3)

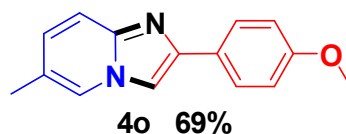

Yellow solid; Mp 175-177 °C; <sup>1</sup>H NMR (300 MHz, CDCl<sub>3</sub>): δ 2.31 (s, 3H), 3.85 (s, 3H), 6.97 (d, *J* = 8.85 Hz, 2H), 7.01 (dd, *J* = 1.52 Hz, *J* = 9.15 Hz, 1H), 7.53 (d, *J* = 9.30 Hz, 1H), 7.69 (s, 1H), 7.87 (d, *J* = 8.85 Hz, 2H), 7.89 (br s, 1H) ppm; <sup>13</sup>C NMR (75 MHz, CDCl<sub>3</sub>): δ 18.0, 55.2, 106.8, 114.0, 116.5, 121.7, 123.1, 126.6, 127.1, 127.5, 144.6, 145.3, 159.3 ppm; IR (KBr) ν = 515, 711, 738, 807, 829, 1423, 1516, 1612 cm<sup>-1</sup>; MS-ESI: *m/z* = 239 [M+H]<sup>+</sup>; HRMS (ESI) calc. C<sub>15</sub>H<sub>15</sub>N<sub>2</sub>O [M+H]<sup>+</sup>: 239.11789, found: 239.11766.

### 6-methyl-2-(4-nitrophenyl)imidazo[1,2-a]pyridine (4p, Scheme 3)

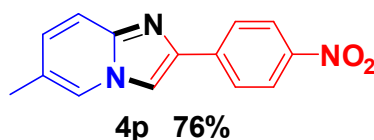

Yellow solid; Mp 238-240 °C; <sup>1</sup>H NMR (300 MHz, CDCl<sub>3</sub>): δ 2.35 (s, 3H), 7.09 (d, *J* = 8.85 Hz, 1H), 7.55 (d, *J* = 9.15 Hz, 1H), 7.91 (s, 1H), 7.94 (s, 1H), 8.09 (d, *J* = 8.69 Hz, 2H), 8.28 (d, *J* = 8.69 Hz, 2H) ppm; <sup>13</sup>C NMR (75 MHz, CDCl<sub>3</sub>): δ 18.1, 109.6, 117.1, 122.9, 123.4, 124.1, 126.2, 128.9, 140.3, 142.9, 145.1, 147.0 ppm; IR (KBr) ν = 521, 748, 819, 849, 1107, 1223, 1426, 1481,

1548  $\text{cm}^{-1}$ ; MS-ESI:  $m/z = 254$   $[\text{M}+\text{H}]^+$ ; HRMS (ESI) calc.  $\text{C}_{14}\text{H}_{12}\text{N}_3\text{O}_2$   $[\text{M}+\text{H}]^+$ : 254.09240, found: 254.09217.

#### 6-nitro-2-phenylimidazo[1,2-a]pyridine (4q, Scheme 3)

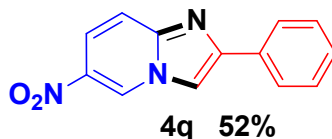

Yellow solid; Mp 171-173  $^{\circ}\text{C}$ ;  $^1\text{H}$  NMR (300 MHz,  $\text{CDCl}_3$  +  $\text{DMSO-d}_6$ ):  $\delta$  7.46 (d,  $J = 9.44$  Hz, 3H), 7.67 (d,  $J = 10.00$  Hz, 1H), 7.97 (t,  $J = 8.12$  Hz, 3H), 8.26 (s, 1H), 9.55 (d,  $J = 1.88$  Hz, 1H) ppm;  $^{13}\text{C}$  NMR (75 MHz,  $\text{CDCl}_3$ ):  $\delta$  110.0, 114.7, 117.3, 124.7, 126.0, 127.3, 128.8, 131.3, 135.3, 143.8, 146.8 ppm; IR (KBr)  $\nu = 509, 702, 722, 791, 812, 1419, 1508, 1631$   $\text{cm}^{-1}$ ; MS-ESI:  $m/z = 240$   $[\text{M}+\text{H}]^+$ ; HRMS (ESI) calc.  $\text{C}_{13}\text{H}_{10}\text{N}_3\text{O}_2$   $[\text{M}+\text{H}]^+$ : 240.07736, found: 240.07684.

#### 6-nitro-2-(p-tolyl)imidazo[1,2-a]pyridine (4r, Scheme 3)

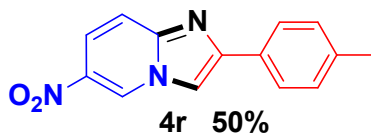

Light yellow solid; Mp 201-203  $^{\circ}\text{C}$ ;  $^1\text{H}$  NMR (300 MHz,  $\text{CDCl}_3$ ):  $\delta$  2.40 (s, 3H), 7.26 (d,  $J = 7.93$  Hz, 3H), 7.68 (d,  $J = 10.00$  Hz, 1H), 7.85 (d,  $J = 8.12$  Hz, 1H), 7.95 (d,  $J = 7.93$  Hz, 1H), 8.06 (s, 1H), 9.34 (s, 1H) ppm;  $^{13}\text{C}$  NMR (75 MHz,  $\text{CDCl}_3$ ):  $\delta$  21.0, 109.8, 115.9, 118.6, 125.8, 128.6, 129.2, 136.7, 138.7, 142.8, 144.9, 148.5 ppm; IR (KBr)  $\nu = 515, 718, 732, 821, 839, 1441, 1523, 1626$   $\text{cm}^{-1}$ ; MS-ESI:  $m/z = 254$   $[\text{M}+\text{H}]^+$ ; HRMS (ESI) calc.  $\text{C}_{14}\text{H}_{12}\text{N}_3\text{O}_2$   $[\text{M}+\text{H}]^+$ : 254.09301, found: 254.09264.

#### 2-(4-bromophenyl)-6-nitroimidazo[1,2-a]pyridine (4s, Scheme 3)

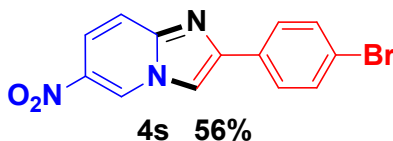

Yellow solid; Mp 212-214  $^{\circ}\text{C}$ ;  $^1\text{H}$  NMR (300 MHz,  $\text{CDCl}_3$  +  $\text{DMSO-d}_6$ ):  $\delta$  7.47 (q,  $J = 7.47$  Hz, 1H), 7.59 (t,  $J = 7.62$  Hz, 1H), 7.63-7.69 (m, 1H), 7.87-8.07 (m, 3H), 8.43 (dd,  $J = 7.17$  Hz,  $J = 13.88$  Hz, 1H), 9.74 (s, 1H) ppm;  $^{13}\text{C}$  NMR (75 MHz,  $\text{CDCl}_3$  +  $\text{DMSO-d}_6$ ):  $\delta$  110.1, 110.4, 115.2, 117.9, 125.1, 126.1, 126.7, 127.6, 130.7, 144.2, 147.4 ppm; IR (KBr)  $\nu = 521, 754, 802, 840, 1025, 1078, 1261, 1382, 1491, 1664$   $\text{cm}^{-1}$ ; MS-ESI:  $m/z = 318$   $[\text{M}+\text{H}]^+$ ; HRMS (ESI) calc.  $\text{C}_{13}\text{H}_9\text{N}_3\text{O}_2\text{Br}$   $[\text{M}+\text{H}]^+$ : 317.98763, found: 317.98721.

#### 6-phenylimidazo[2,1-b]thiazole (6a, Scheme 4)

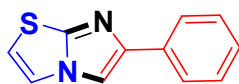

**6a 86%**

White solid; Mp 148-150 °C; <sup>1</sup>H NMR (300 MHz, CDCl<sub>3</sub>): δ 6.83 (d, *J* = 4.34 Hz, 1H), 7.30 (d, *J* = 7.36 Hz, 1H), 7.37-7.46 (m, 3H), 7.75 (s, 1H), 7.83 (d, *J* = 7.17 Hz, 2H) ppm; <sup>13</sup>C NMR (75 MHz, CDCl<sub>3</sub>): δ 107.8, 112.4, 118.4, 125.1, 127.3, 128.6, 134.0, 147.8, 150.1 ppm; IR (KBr) ν = 502, 641, 721, 826, 993, 1064, 1181, 1388, 1466, 1522 cm<sup>-1</sup>; MS-ESI: *m/z* = 201 [M+H]<sup>+</sup>; HRMS (ESI) calc. C<sub>11</sub>H<sub>9</sub>N<sub>2</sub>S [M+H]<sup>+</sup>: 201.04810, found: 201.04783.

#### 6-*p*-tolylimidazo[2,1-*b*]thiazole (6b, Scheme 4)

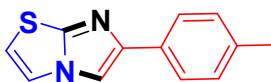

**6b 80%**

White solid; Mp 147-149 °C; <sup>1</sup>H NMR (300 MHz, CDCl<sub>3</sub>): δ 2.37 (s, 3H), 6.81 (d, *J* = 4.34 Hz, 1H), 7.21 (d, *J* = 7.93 Hz, 2H), 7.42 (d, *J* = 4.34 Hz, 1H), 7.71 (s, 2H), 7.73 (s, 1H) ppm; <sup>13</sup>C NMR (75 MHz, CDCl<sub>3</sub>): δ 21.2, 107.4, 112.2, 118.4, 125.1, 129.3, 131.2, 137.1, 148.0 ppm; IR (KBr) ν = 640, 709, 830, 1017, 1177, 1240, 1406, 1461, 1541 cm<sup>-1</sup>; MS-ESI: *m/z* = 215 [M+H]<sup>+</sup>; HRMS (ESI) calc. C<sub>12</sub>H<sub>11</sub>N<sub>2</sub>S [M+H]<sup>+</sup>: 215.06429, found: 215.06296.

#### 6-(4-methoxyphenyl)imidazo[2,1-*b*]thiazole (6c, Scheme 4)

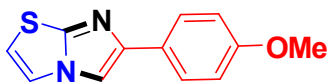

**6c 76%**

Light yellow solid; Mp 154-156 °C; <sup>1</sup>H NMR (300 MHz, CDCl<sub>3</sub>): δ 3.84 (s, 3H), 6.80 (d, *J* = 4.42 Hz, 1H), 6.94 (d, *J* = 8.54 Hz, 2H), 7.41 (d, *J* = 4.42 Hz, 1H), 7.65 (s, 1H), 7.75 (d, *J* = 8.69 Hz, 2H) ppm; <sup>13</sup>C NMR (75 MHz, CDCl<sub>3</sub>): δ 55.2, 106.9, 112.0, 114.0, 118.4, 126.4, 126.9, 147.8, 159.0 ppm; IR (KBr) ν = 648, 712, 835, 1021, 1180, 1243, 1408, 1466, 1542 cm<sup>-1</sup>; MS-ESI: *m/z* = 231 [M+H]<sup>+</sup>; HRMS (ESI) calc. C<sub>12</sub>H<sub>11</sub>N<sub>2</sub>OS [M+H]<sup>+</sup>: 231.05921, found: 231.05777.

#### 6-(4-chlorophenyl)imidazo[2,1-*b*]thiazole (6d, Scheme 4)

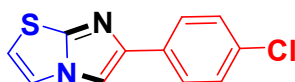

**6d 88%**

White solid; Mp 163-165 °C; <sup>1</sup>H NMR (300 MHz, CDCl<sub>3</sub>): δ 6.84 (d, *J* = 4.53 Hz, 1H), 7.43 (d, *J* = 4.53 Hz, 1H), 7.52 (d, *J* = 8.49 Hz, 2H), 7.71 (t, *J* = 8.49 Hz, 3H) ppm; <sup>13</sup>C NMR (75 MHz, CDCl<sub>3</sub>): δ 108.0, 112.7, 118.3, 121.0, 126.7, 131.7, 133.0, 146.7, 150.3 ppm; IR (KBr) ν = 500, 643, 725, 829, 997, 1062, 1184, 1392, 1455, 1529 cm<sup>-1</sup>; MS-ESI: *m/z* = 235 [M+H]<sup>+</sup>.



### 6-(4-bromophenyl)imidazo[2,1-b]thiazole (6e, Scheme 4)

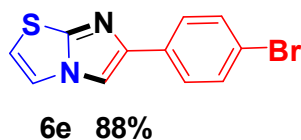

White solid; Mp 181-183 °C;  $^1\text{H}$  NMR (300 MHz,  $\text{CDCl}_3$ ):  $\delta$  6.83 (d,  $J = 4.42$  Hz, 1H), 7.36 (d,  $J = 8.39$  Hz, 2H), 7.42 (d,  $J = 4.42$  Hz, 1H), 7.71 (s, 1H), 7.75 (d,  $J = 8.39$  Hz, 2H) ppm;  $^{13}\text{C}$  NMR (75 MHz,  $\text{CDCl}_3$ ):  $\delta$  108.0, 112.7, 118.3, 121.0, 126.6, 131.7, 133.0, 146.7, 150.3 ppm; IR (KBr)  $\nu = 503, 646, 728, 835, 1003, 1069, 1188, 1398, 1459, 1535$   $\text{cm}^{-1}$ .

### 8-methoxy-2-phenyl-benzo[d]imidazo[2,1-b]thiazole (6f, Scheme 4)

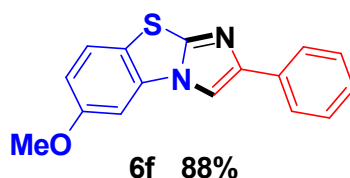

Pale yellow solid; Mp 147-149 °C;  $^1\text{H}$  NMR (300 MHz,  $\text{CDCl}_3$ ):  $\delta$  3.86 (s, 3H), 7.00 (dd,  $J = 2.44$  Hz,  $J = 8.85$  Hz, 1H), 7.20 (d,  $J = 2.44$  Hz, 1H), 7.28 (tt,  $J = 1.22$  Hz,  $J = 8.87$  Hz, 1H), 7.41 (t,  $J = 7.47$  Hz, 2H), 7.49 (d,  $J = 8.85$  Hz, 1H), 7.86 (dd,  $J = 1.22$  Hz,  $J = 8.39$  Hz, 2H), 7.89 (s, 1H) ppm;  $^{13}\text{C}$  NMR (75 MHz,  $\text{CDCl}_3$ ):  $\delta$  55.8, 106.7, 108.7, 113.0, 113.3, 125.0, 126.3, 127.3, 128.6, 131.4, 133.8, 147.1, 147.4, 157.1 ppm; IR (KBr):  $\nu = 700, 841, 1020, 1047, 1212, 1255, 1328, 1511, 1615$   $\text{cm}^{-1}$ ; MS-ESI:  $m/z = 281$   $[\text{M}+\text{H}]^+$ ; HRMS (ESI) calc.  $\text{C}_{16}\text{H}_{13}\text{N}_2\text{OS}$   $[\text{M}+\text{H}]^+$ : 281.07486, found: 281.07374.

### 2-(4-fluoro-phenyl)-8-Methoxy-benzo[d]imidazo[2,1-b]thiazole (6g, Scheme 4)

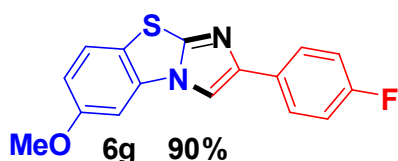

Pale yellow solid; Mp 193-195 °C;  $^1\text{H}$  NMR (300 MHz,  $\text{CDCl}_3$ ):  $\delta$  3.88 (s, 3H), 7.01 (d,  $J = 8.39$  Hz, 1H), 7.10 (t,  $J = 8.54$  Hz, 2H), 7.22 (br s, 1H), 7.51 (d,  $J = 8.85$  Hz, 1H), 7.78-7.87 (m, 3H) ppm;  $^{13}\text{C}$  NMR (75 MHz,  $\text{CDCl}_3$ ):  $\delta$  55.9, 106.4, 108.7, 113.0, 113.4, 115.5 (d,  $^2J_{\text{C-F}} = 21.7$  Hz), 126.3, 126.6 (d,  $^3J_{\text{C-F}} = 8.1$  Hz), 130.1 (d,  $^4J_{\text{C-F}} = 2.7$  Hz), 131.4, 146.3, 147.5, 157.2, 162.2 (d,  $^1J_{\text{C-F}} = 246.1$  Hz) ppm; IR (KBr):  $\nu = 516, 702, 794, 843, 1032, 1060, 1200, 1270, 1496, 1544, 1607$   $\text{cm}^{-1}$ ; MS-ESI:  $m/z = 299$   $[\text{M}+\text{H}]^+$ ; HRMS (ESI) calc.  $\text{C}_{16}\text{H}_{12}\text{N}_2\text{OFS}$   $[\text{M}+\text{H}]^+$ : 299.06544, found: 299.06367.

### 2-(4-chloro-phenyl)-8-Methoxy-benzo[d]imidazo[2,1-b]thiazole (6h, Scheme 4)

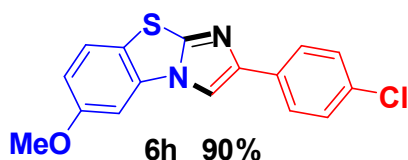

White solid; Mp 201-203 °C; <sup>1</sup>H NMR (300 MHz, CDCl<sub>3</sub>): δ 3.88 (s, 3H), 7.01 (dd, *J* = 2.45 Hz, *J* = 8.87 Hz, 1H), 7.21 (d, *J* = 2.45 Hz, 1H), 7.37 (d, *J* = 8.49 Hz, 2H), 7.50 (d, *J* = 8.87 Hz, 1H), 7.78 (d, *J* = 8.49 Hz, 2H), 7.89 (s, 1H) ppm; <sup>13</sup>C NMR (75 MHz, CDCl<sub>3</sub> + DMSO-*d*<sub>6</sub>): δ 55.0, 106.9, 107.9, 112.7, 125.3, 127.8, 130.2, 131.5, 131.8, 144.7, 146.4, 156.4 ppm; IR (KBr): ν = 730, 793, 822, 1031, 1062, 1195, 1270, 1496 cm<sup>-1</sup>; MS-ESI: *m/z* = 315 [M+H]<sup>+</sup>; HRMS (ESI) calc. C<sub>16</sub>H<sub>12</sub>N<sub>2</sub>OCIS [M+H]<sup>+</sup>: 315.03534, found: 315.03490.

#### 2-(4-bromo-phenyl)-8-Methoxy-benzo[d]imidazo[2,1-b]thiazole (6i, Scheme 4)

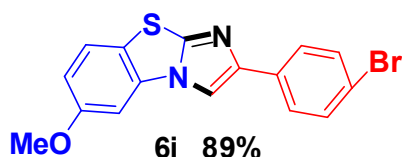

Pale yellow solid; Mp 197-199 °C; <sup>1</sup>H NMR (300 MHz, CDCl<sub>3</sub>): δ 3.87 (s, 3H), 7.01 (dd, *J* = 2.44 Hz, *J* = 8.85 Hz, 1H), 7.21 (d, *J* = 2.44 Hz, 1H), 7.49 (d, *J* = 8.85 Hz, 1H), 7.52 (d, *J* = 8.54 Hz, 2H), 7.71 (d, *J* = 8.54 Hz, 2H), 7.89 (s, 1H) ppm; <sup>13</sup>C NMR (75 MHz, CDCl<sub>3</sub>): δ 55.9, 106.9, 108.7, 113.1, 113.4, 120.9, 126.2, 126.5, 131.4, 131.7, 132.8, 146.0, 147.6, 157.2 ppm; IR (KBr): ν = 728, 789, 819, 1026, 1057, 1196, 1275, 1501 cm<sup>-1</sup>; MS-ESI: *m/z* = 359 [M+2H]<sup>+</sup>; HRMS (ESI) calc. C<sub>16</sub>H<sub>12</sub>N<sub>2</sub>OBrS [M+H]<sup>+</sup>: 358.98482, found: 358.98436.

#### 2-(4-nitro-phenyl)-8-Methoxy-benzo[d]imidazo[2,1-b]thiazole (6j, Scheme 4)

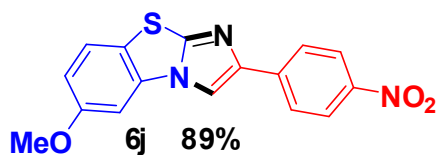

Yellow solid; Mp 213-215 °C; <sup>1</sup>H NMR (300 MHz, CDCl<sub>3</sub>): δ 3.89 (s, 3H), 7.04 (dd, *J* = 2.44 Hz, *J* = 8.85 Hz, 1H), 7.23 (d, *J* = 2.44 Hz, 1H), 7.54 (d, *J* = 8.85 Hz, 1H), 7.99 (d, *J* = 9.00 Hz, 2H), 8.05 (s, 1H), 8.26 (d, *J* = 9.00 Hz, 2H) ppm; <sup>13</sup>C NMR (75 MHz, CDCl<sub>3</sub>): δ 55.9, 89.2, 108.9, 113.4, 113.7, 117.3, 122.2, 124.2, 125.2, 131.7, 134.0, 140.2, 146.6, 157.7 ppm; IR (KBr): ν = 717, 853, 1029, 1058, 1200, 1267, 1342, 1511, 1601 cm<sup>-1</sup>; MS-ESI: *m/z* = 326 [M+H]<sup>+</sup>; HRMS (ESI) calc. C<sub>16</sub>H<sub>12</sub>N<sub>3</sub>O<sub>3</sub>S [M+H]<sup>+</sup>: 326.05998, found: 326.05956.

#### 8-Methoxy-2-p-tolyl-benzo[d]imidazo[2,1-b]thiazole (6k, Scheme 4)

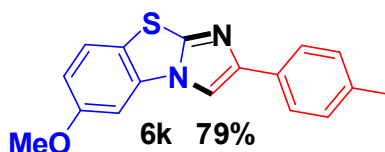

White solid; Mp 157-159 °C;  $^1\text{H}$  NMR (300 MHz,  $\text{CDCl}_3$ ):  $\delta$  2.37 (s, 3H), 3.85 (s, 3H), 6.98 (dd,  $J = 2.44$  Hz,  $J = 8.85$  Hz, 1H), 7.18 (d,  $J = 2.44$  Hz, 1H), 7.22 (d,  $J = 7.93$  Hz, 2H), 7.46 (d,  $J = 8.85$  Hz, 1H), 7.74 (d,  $J = 8.08$  Hz, 2H), 7.84 (s, 1H) ppm;  $^{13}\text{C}$  NMR (75 MHz,  $\text{CDCl}_3$ ):  $\delta$  21.2, 55.8, 106.3, 108.6, 112.9, 113.2, 124.8, 126.3, 129.3, 131.1, 131.3, 137.0, 147.2, 147.3, 157.0 ppm; IR (KBr):  $\nu = 731, 793, 823, 1029, 1060, 1190, 1267, 1496, 1548$   $\text{cm}^{-1}$ ; MS-ESI:  $m/z = 295$   $[\text{M}+\text{H}]^+$ ; HRMS (ESI) calc.  $\text{C}_{17}\text{H}_{15}\text{N}_2\text{OS}$   $[\text{M}+\text{H}]^+$ : 295.08996, found: 295.08950.

#### 8-Methoxy-2-(4-methoxy-phenyl)- benzo[d]imidazo[2,1-b]thiazole (6l, Scheme 4)

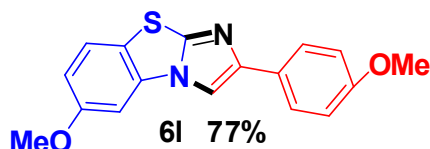

White solid; Mp 188-190 °C;  $^1\text{H}$  NMR (300 MHz,  $\text{CDCl}_3$ ):  $\delta$  3.85 (s, 3H), 3.86 (s, 3H), 6.95 (d,  $J = 8.69$  Hz, 2H), 6.99 (dd,  $J = 2.44$  Hz,  $J = 8.69$  Hz, 1H), 7.20 (d,  $J = 2.28$  Hz, 1H), 7.47 (d,  $J = 8.85$  Hz, 1H), 7.78 (d,  $J = 8.69$  Hz, 2H), 7.80 (s, 1H) ppm;  $^{13}\text{C}$  NMR (75 MHz,  $\text{CDCl}_3$ ):  $\delta$  55.2, 55.8, 105.7, 108.7, 112.9, 113.2, 114.0, 126.2, 126.4, 126.7, 131.3, 147.1, 147.1, 157.0, 159.0 ppm; IR (KBr):  $\nu = 703, 794, 840, 1030, 1241, 1269, 1496, 1546, 1610$   $\text{cm}^{-1}$ ; MS-ESI:  $m/z = 311$   $[\text{M}+\text{H}]^+$ ; HRMS (ESI) calc.  $\text{C}_{17}\text{H}_{15}\text{N}_2\text{O}_2\text{S}$   $[\text{M}+\text{H}]^+$ : 311.08487, found: 311.08405.

# <sup>1</sup>H NMR, <sup>13</sup>C NMR and HRMS spectra

## Compound 4a

### <sup>1</sup>H NMR (300 MHz, CDCl<sub>3</sub>)

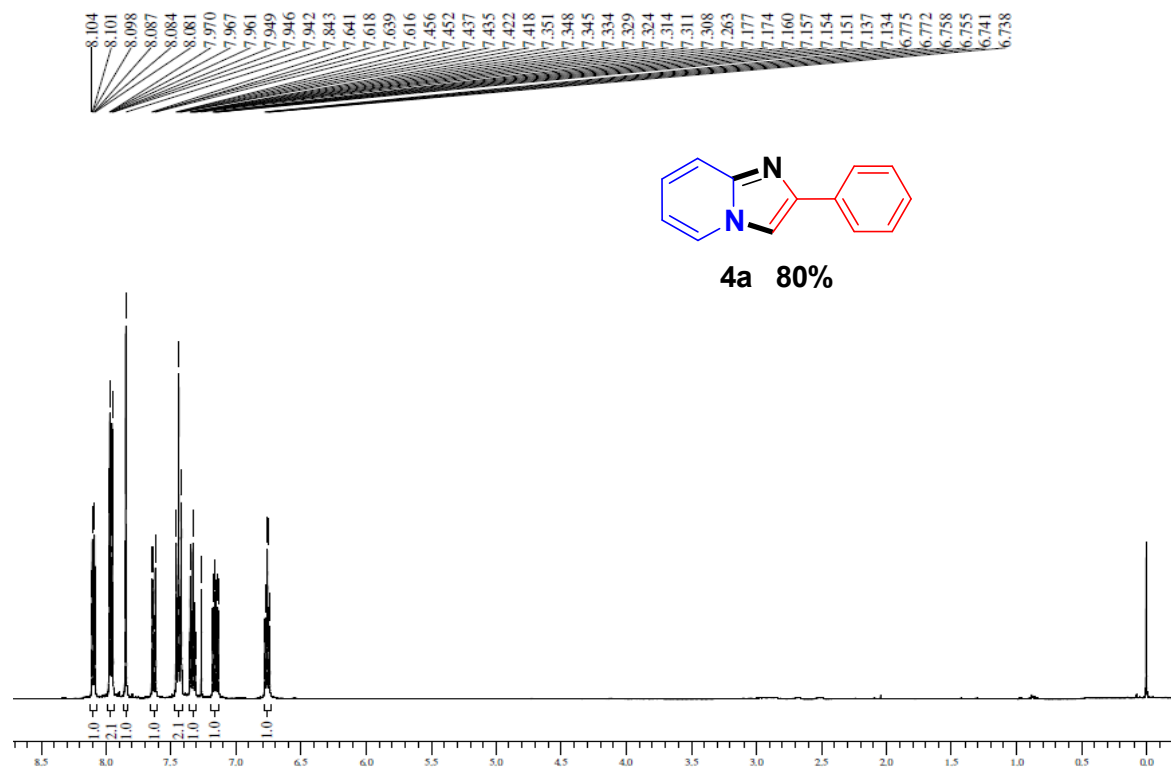

### <sup>13</sup>C NMR (75 MHz, CDCl<sub>3</sub>)

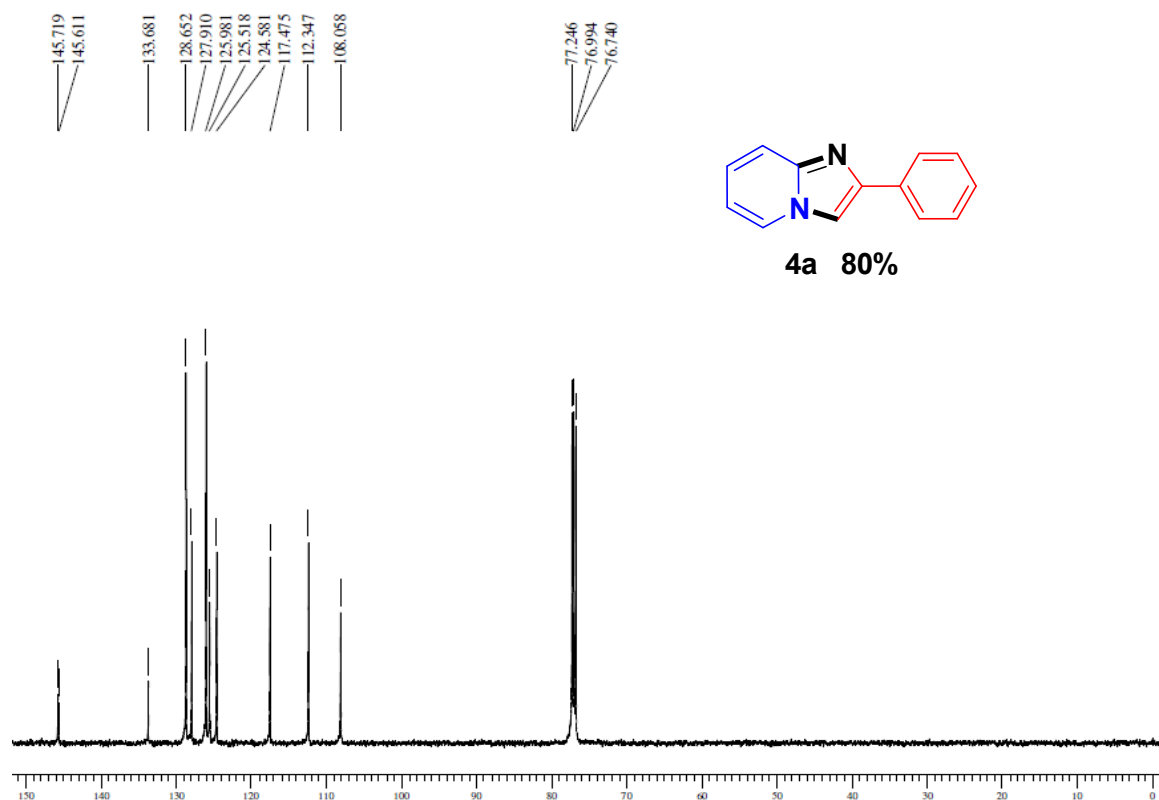

## HRMS (ESI)

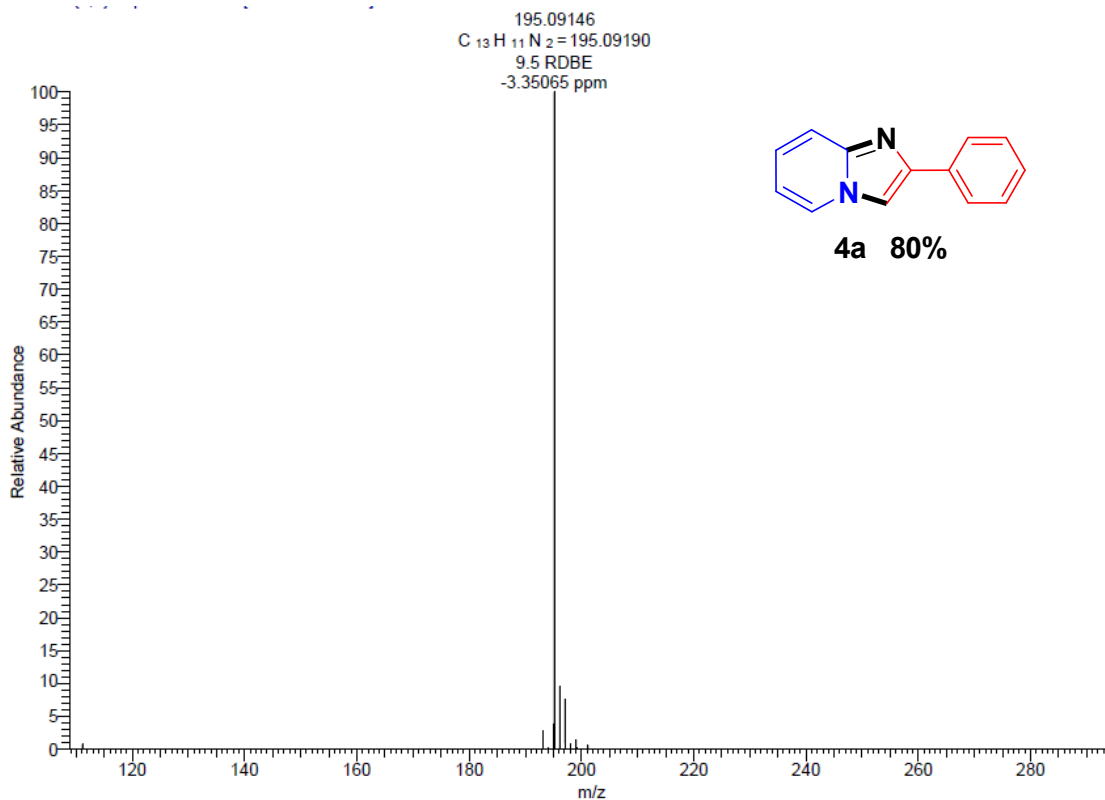

## Compound 4b

### <sup>1</sup>H NMR (300 MHz, CDCl<sub>3</sub>)

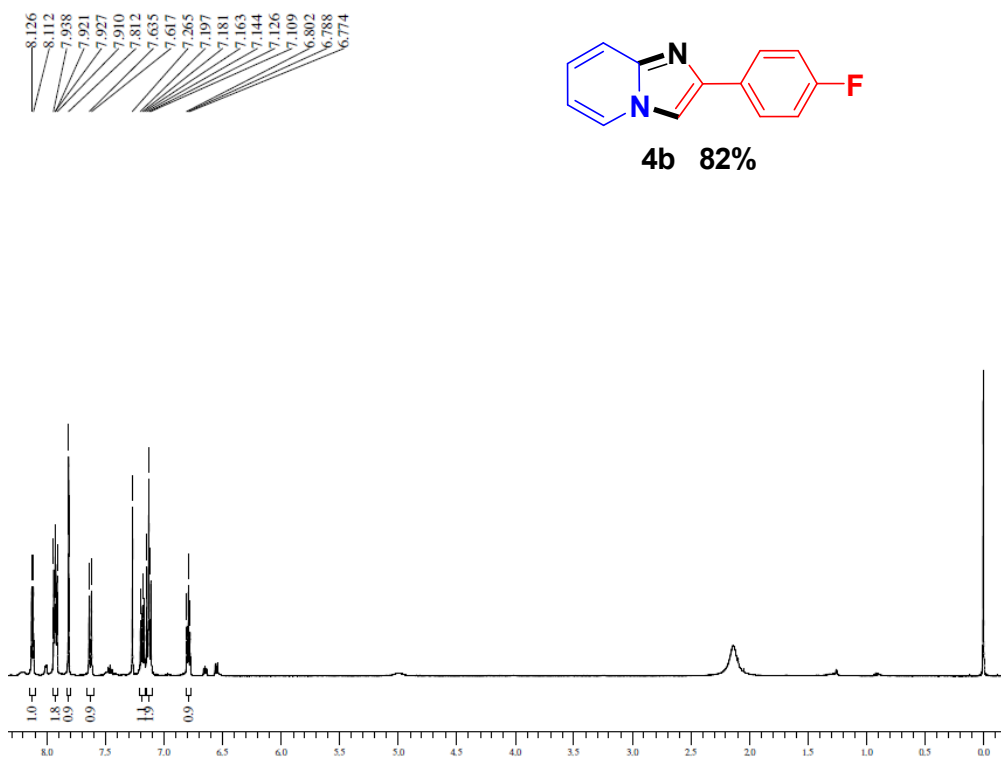

### <sup>13</sup>C NMR (75 MHz, CDCl<sub>3</sub>)

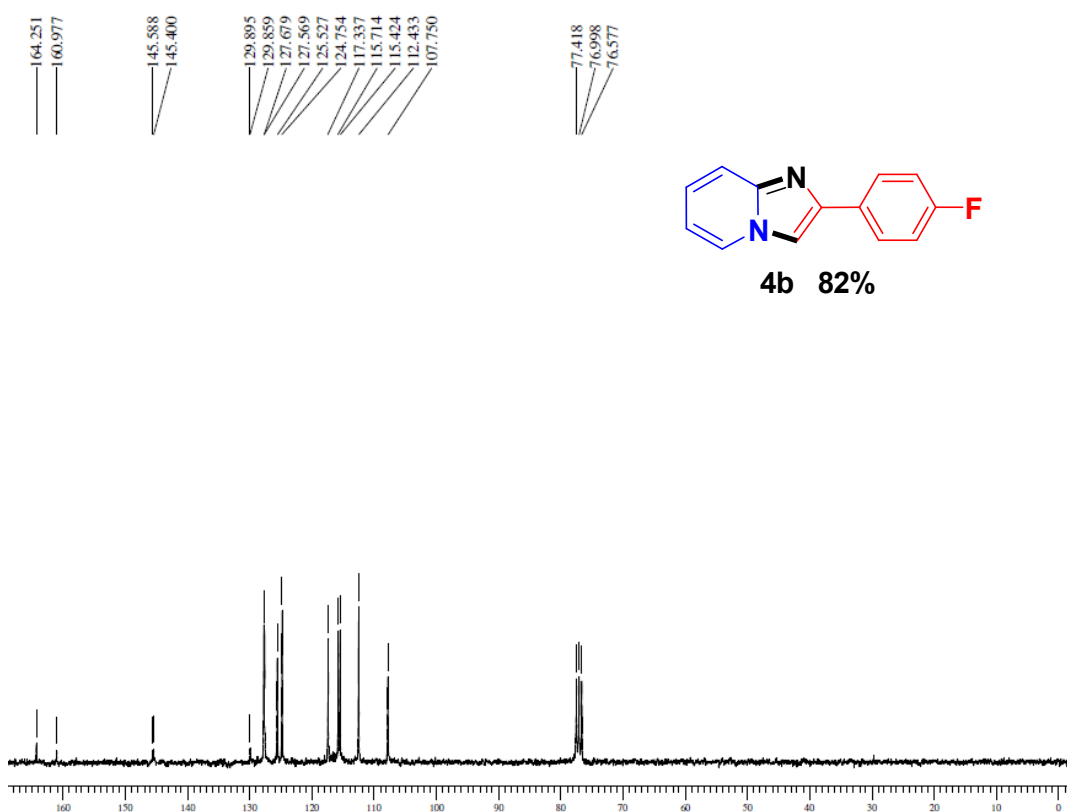

### HRMS (ESI)

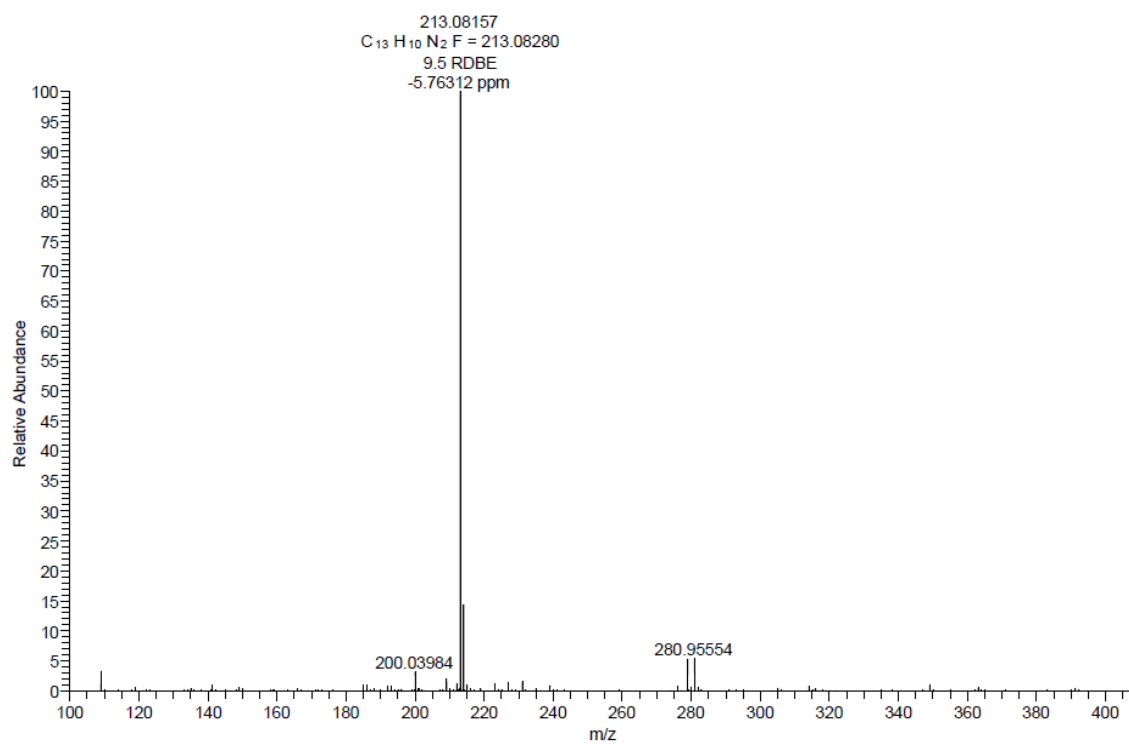

## Compound 4c

### <sup>1</sup>H NMR (300 MHz, CDCl<sub>3</sub>)

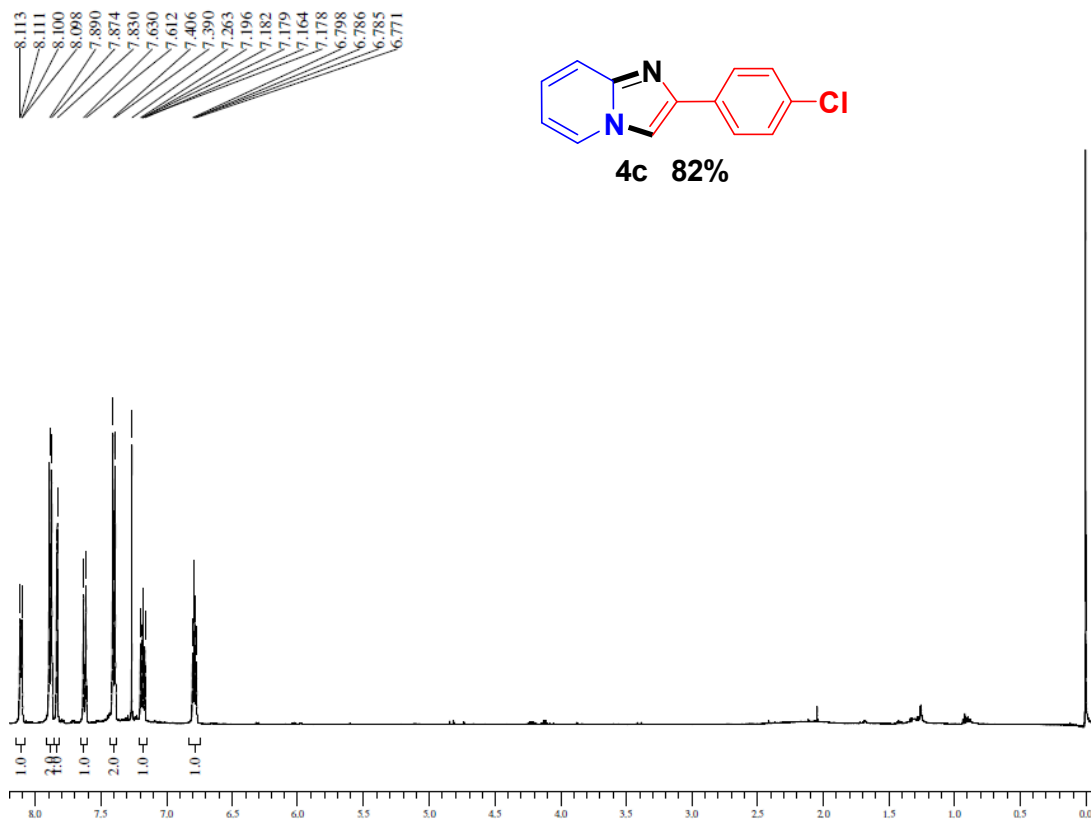

### <sup>13</sup>C NMR (75 MHz, CDCl<sub>3</sub>)

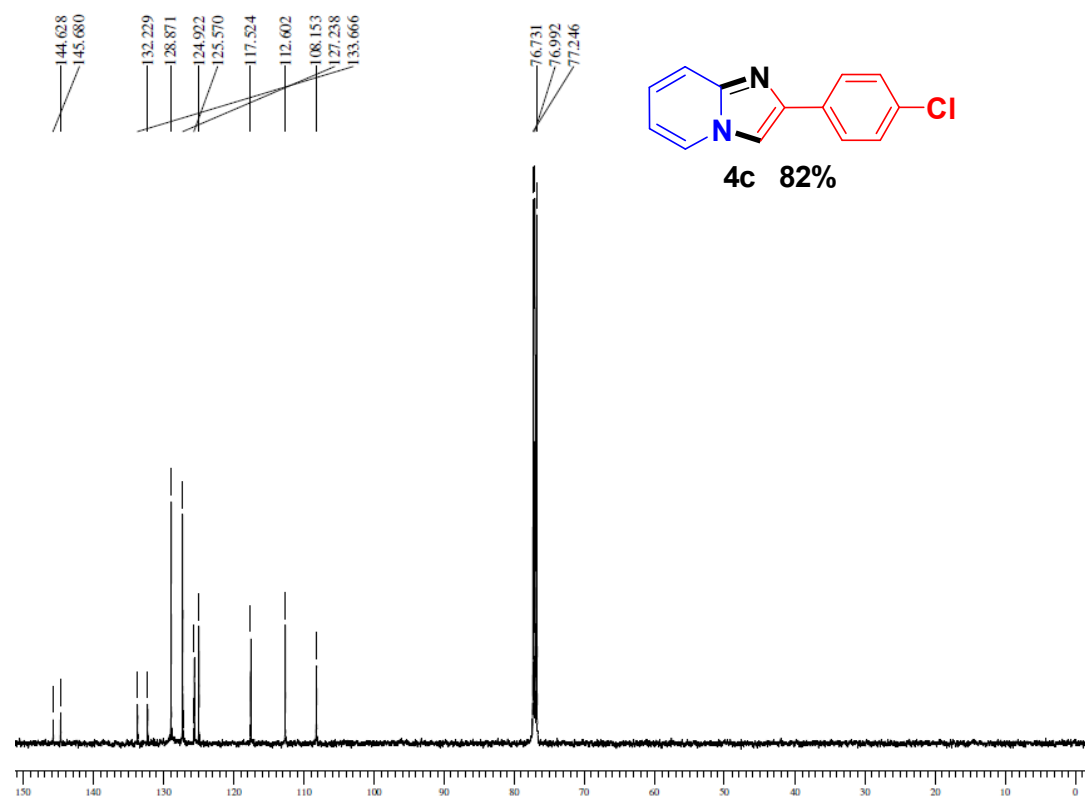

## HRMS (ESI)

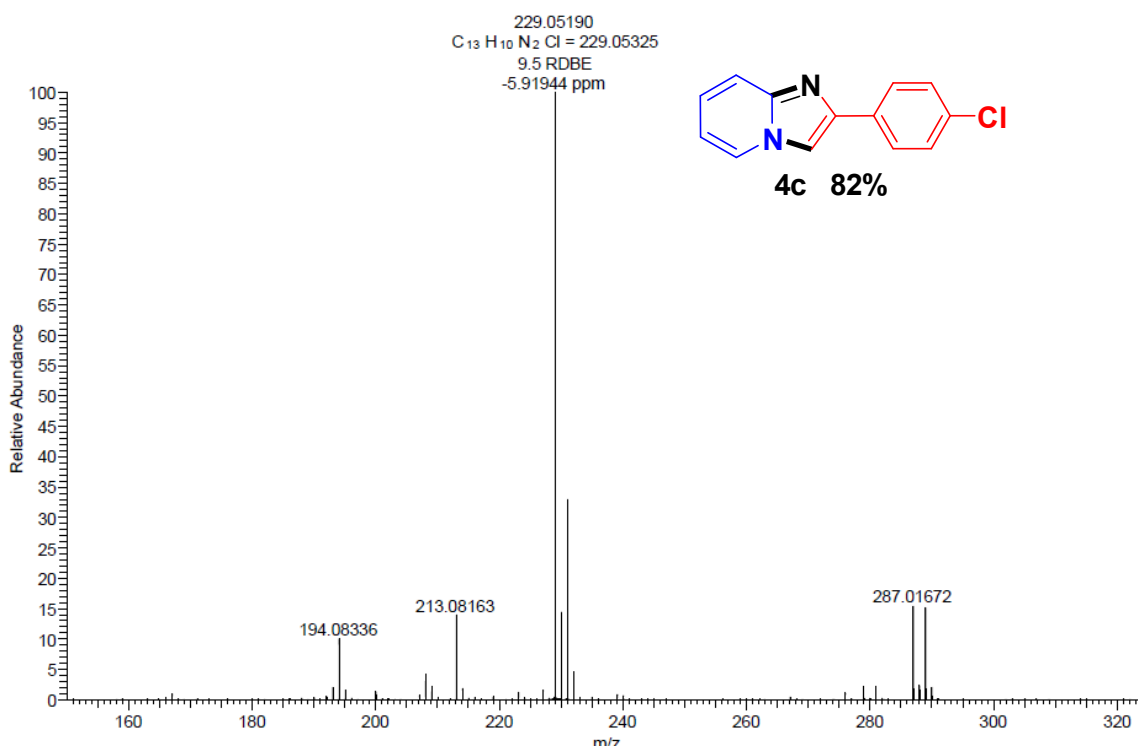

## Compound 4d

### <sup>13</sup>C NMR (75 MHz, CDCl<sub>3</sub>)

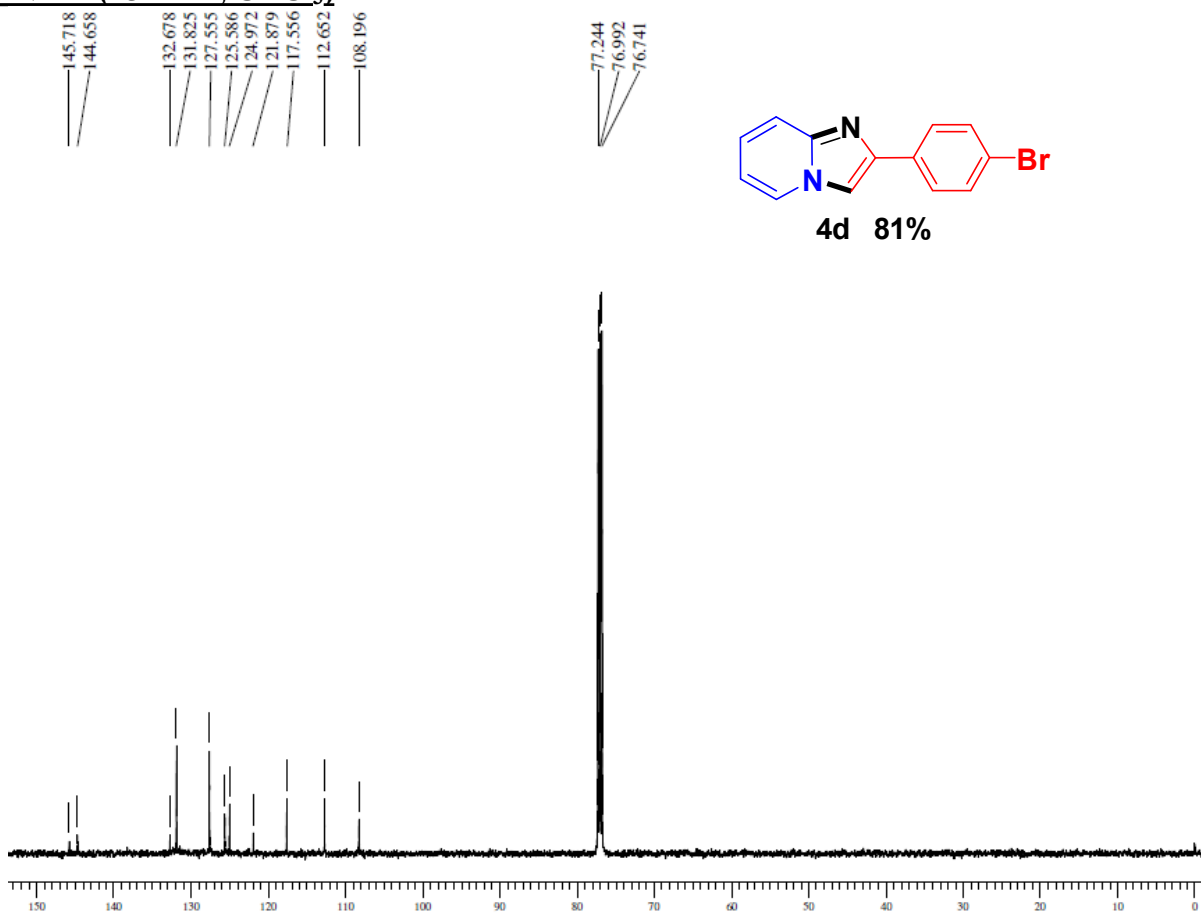

## HRMS (ESI)



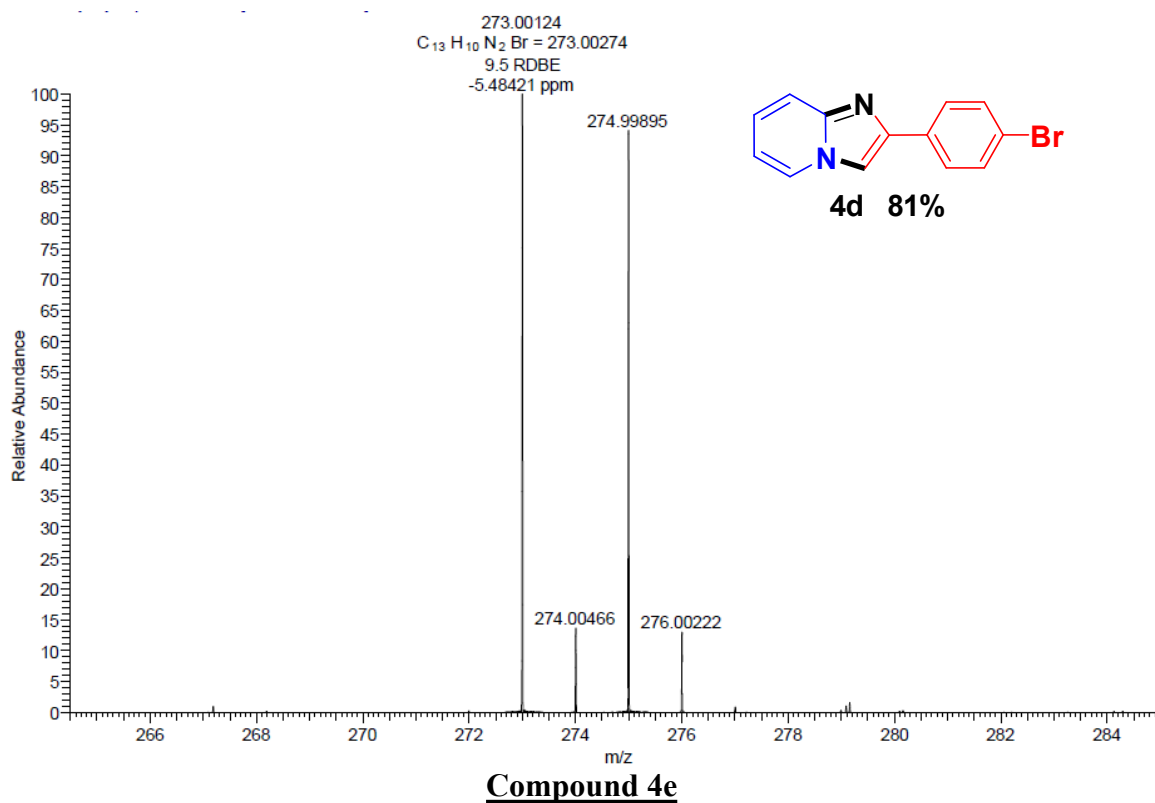

**$^1H$  NMR (300 MHz,  $CDCl_3$ )**

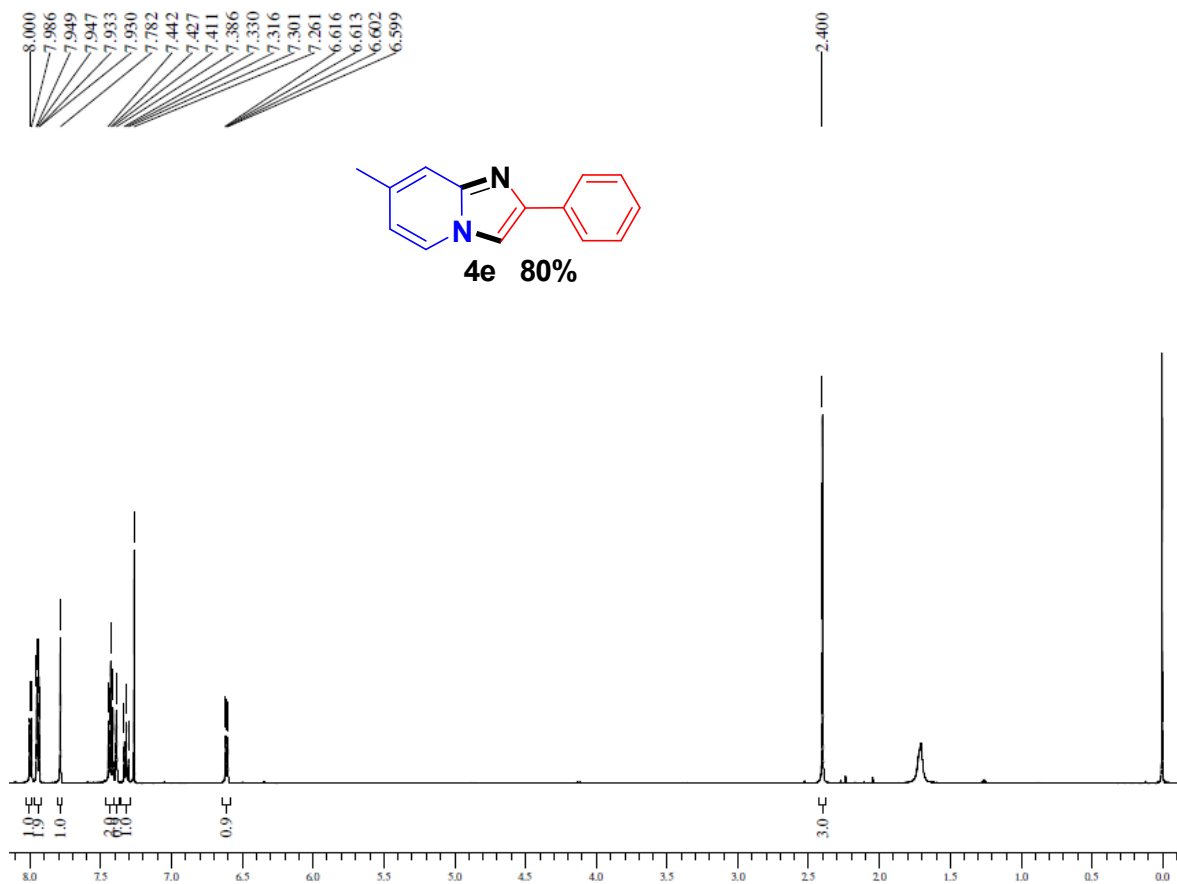

**$^{13}C$  NMR (75 MHz,  $CDCl_3$ )**

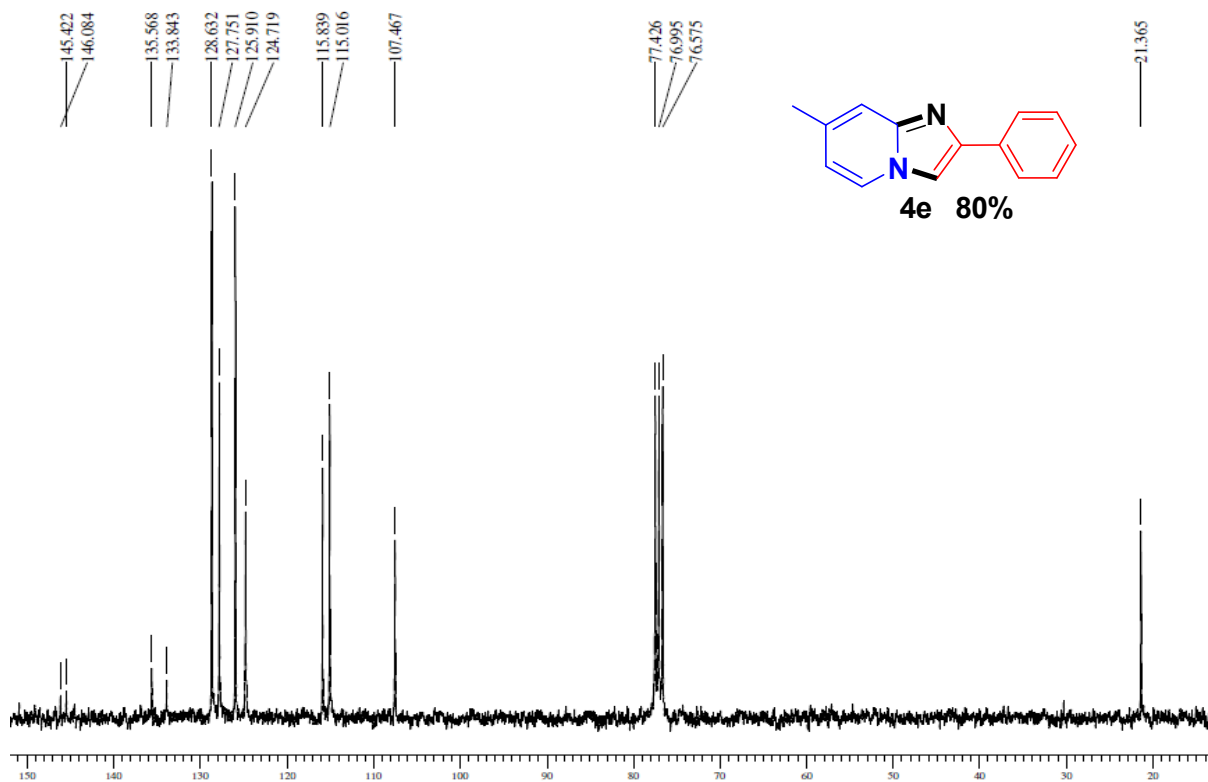

**HRMS (ESI)**

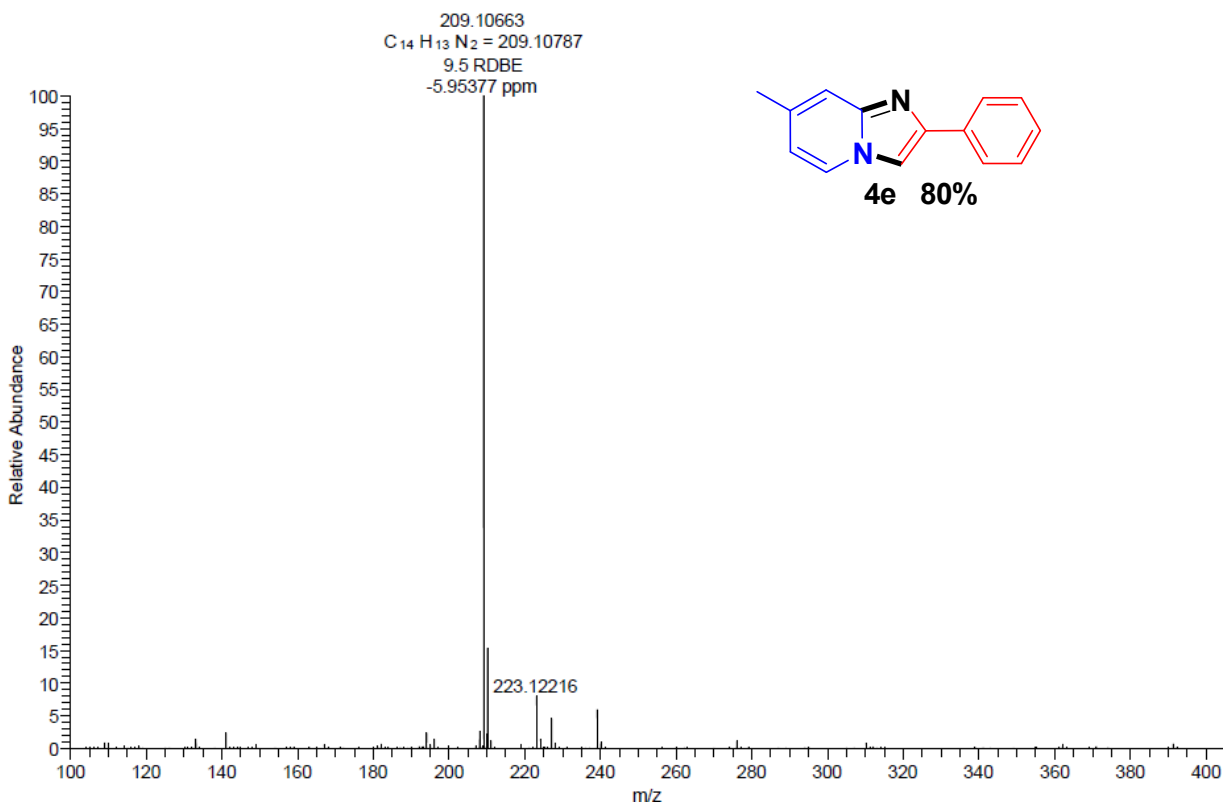

**Compound 4f**

### <sup>1</sup>H NMR (300 MHz, CDCl<sub>3</sub>)

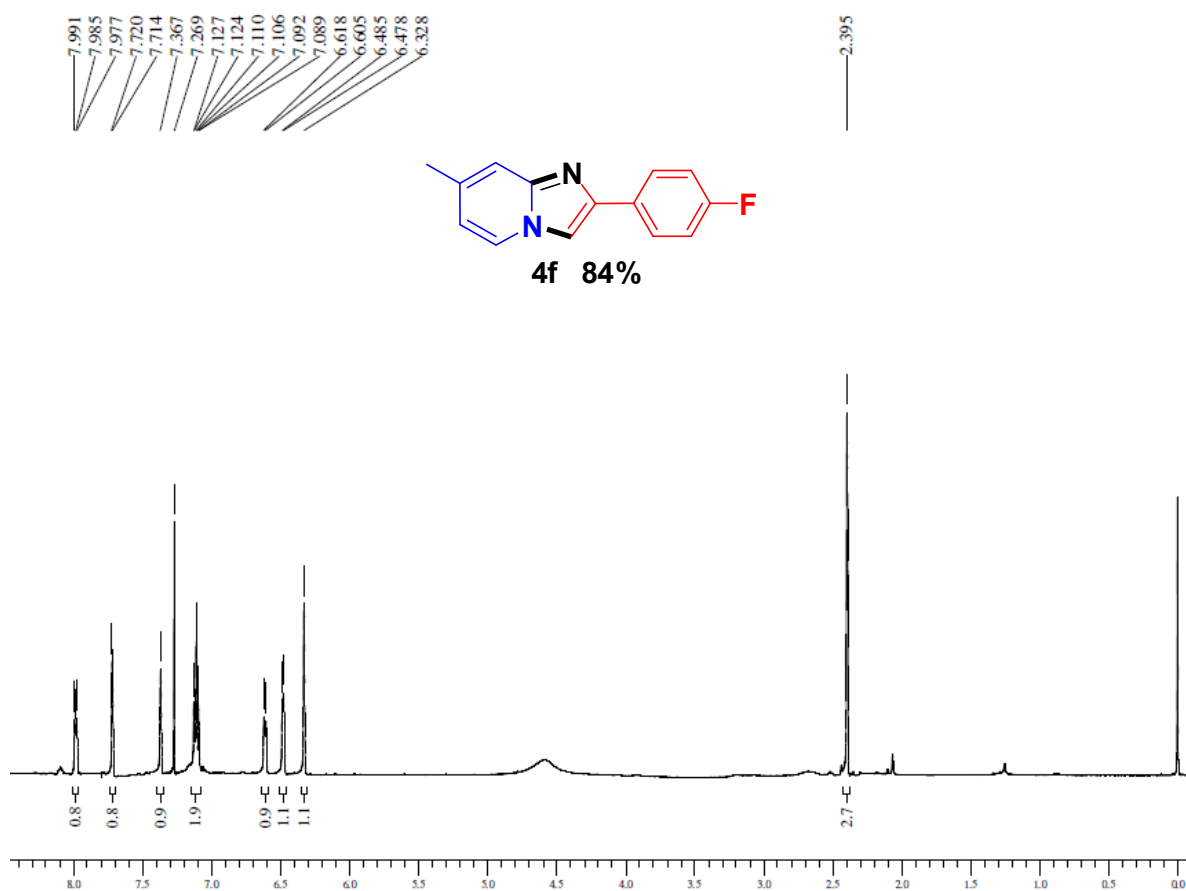

### <sup>13</sup>C NMR (75 MHz, CDCl<sub>3</sub>)

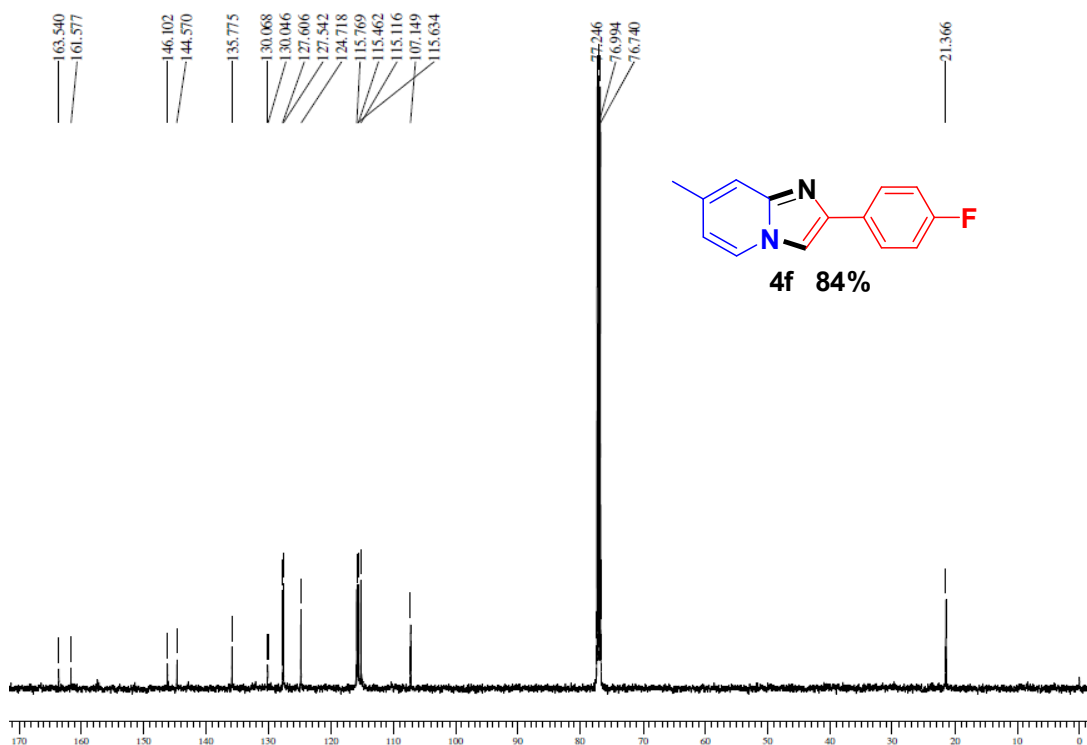

### HRMS (ESI)

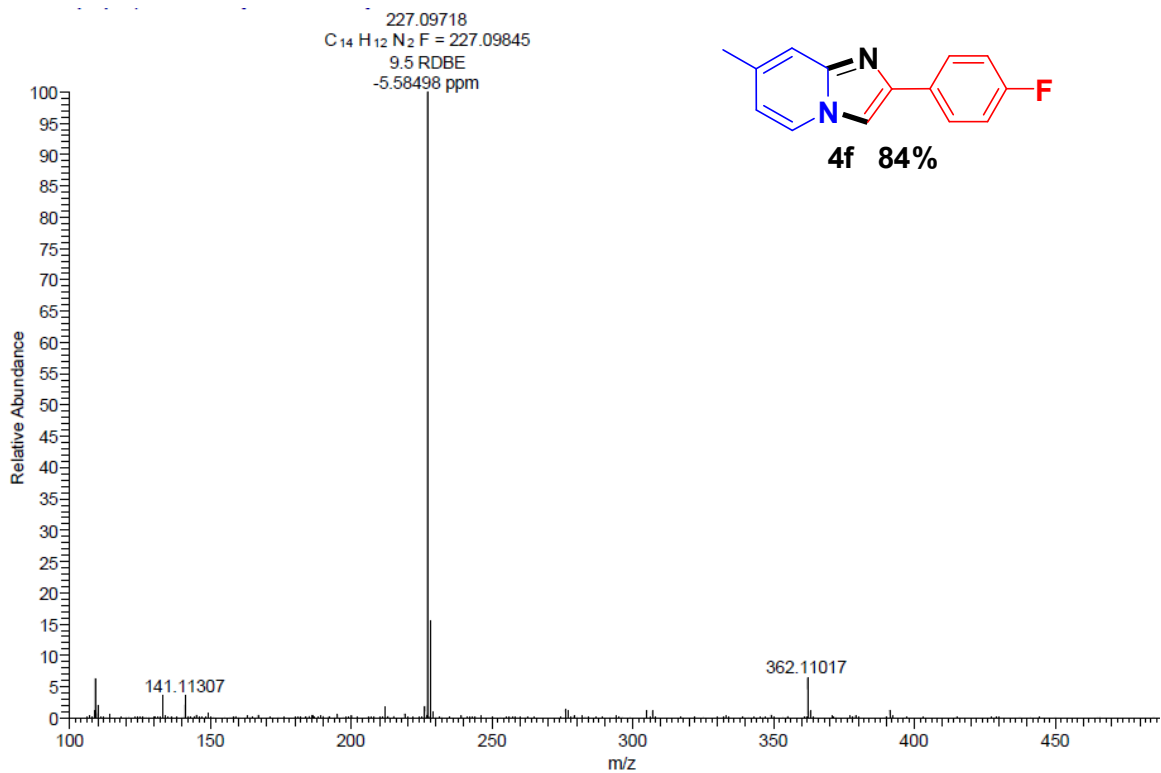

### Compound 4g

#### <sup>1</sup>H NMR (300 MHz, CDCl<sub>3</sub>)

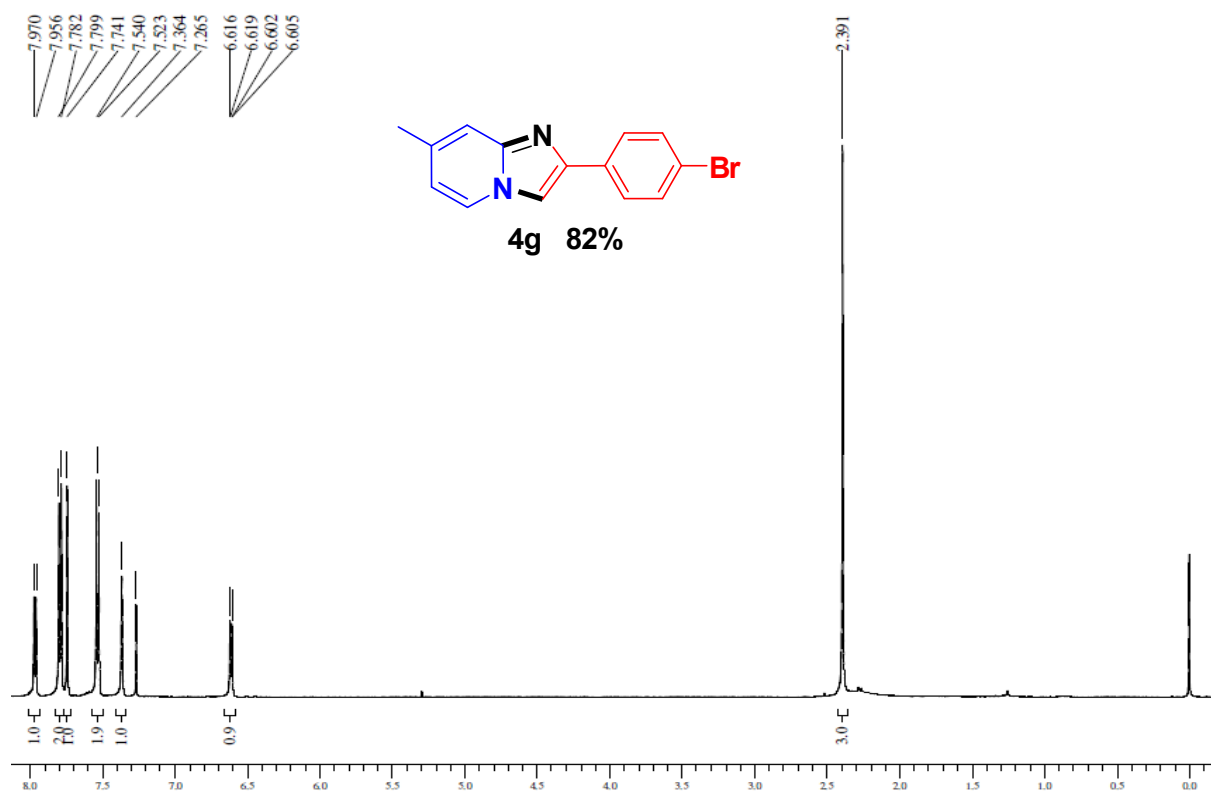

#### <sup>13</sup>C NMR (75 MHz, CDCl<sub>3</sub>)

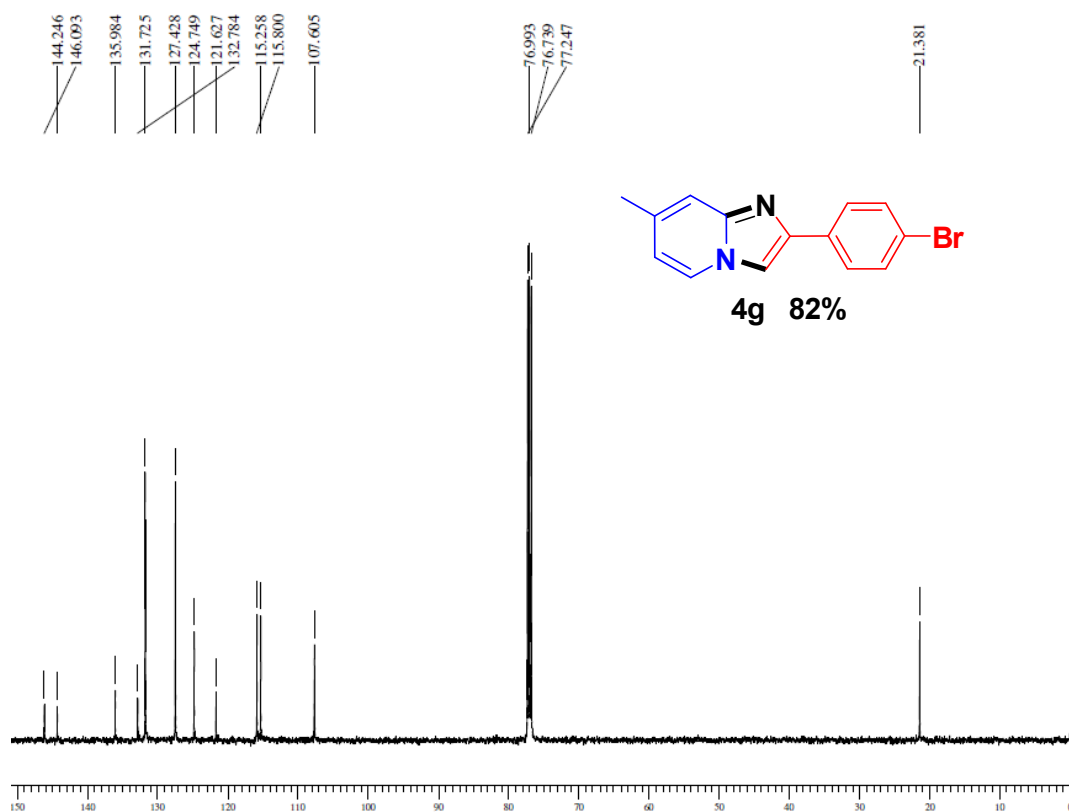

### HRMS (ESI)

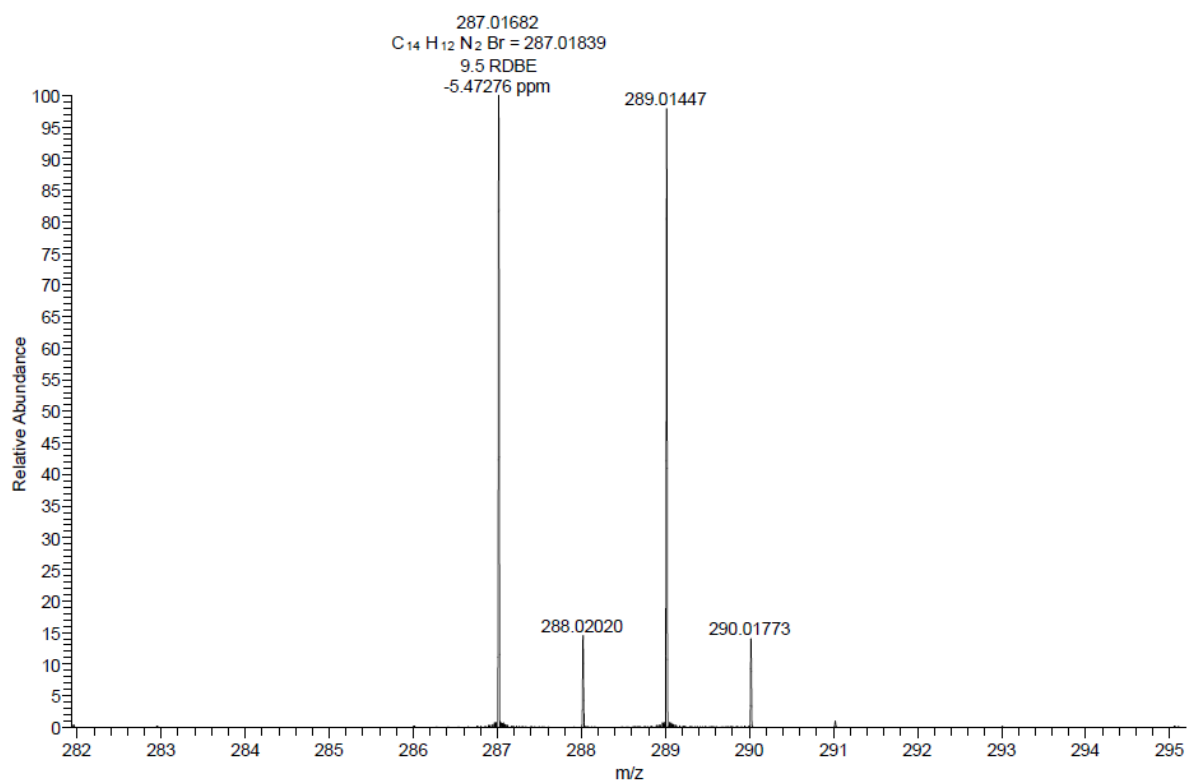

### Compound 4h

### <sup>1</sup>H NMR (300 MHz, CDCl<sub>3</sub>)

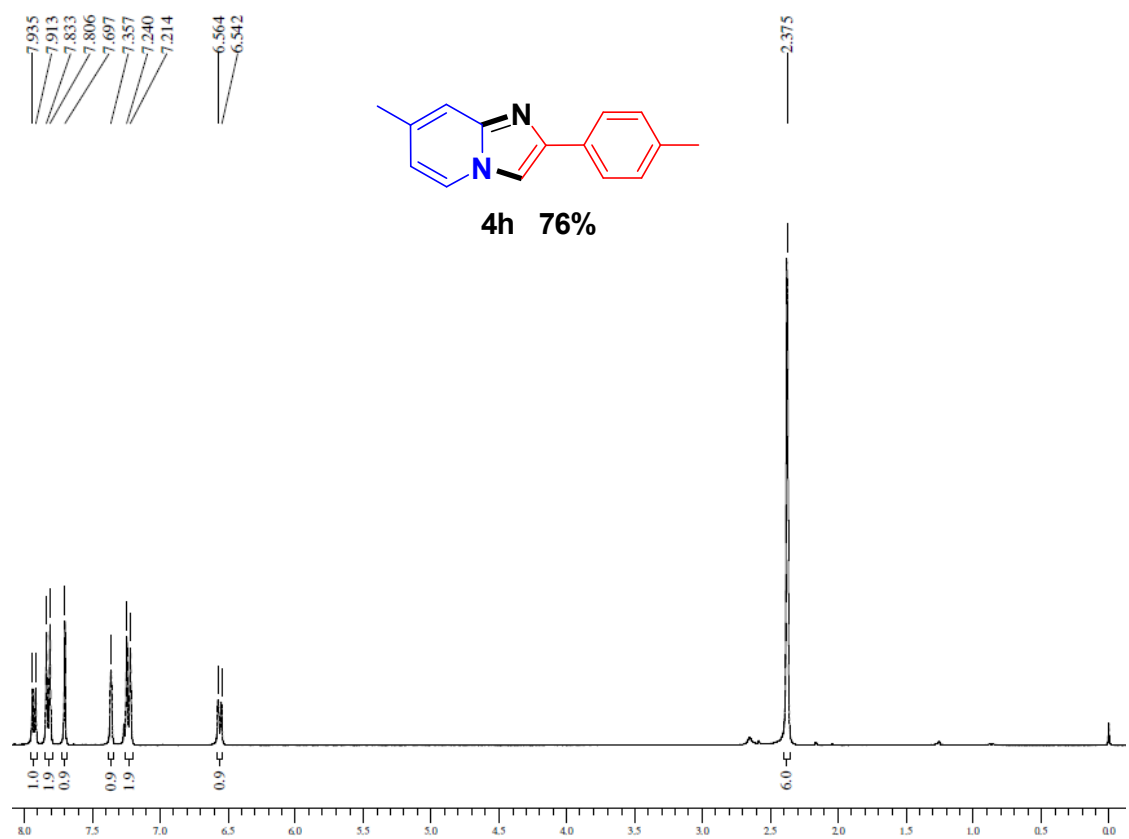

**<sup>13</sup>C NMR (75 MHz, CDCl<sub>3</sub>)**

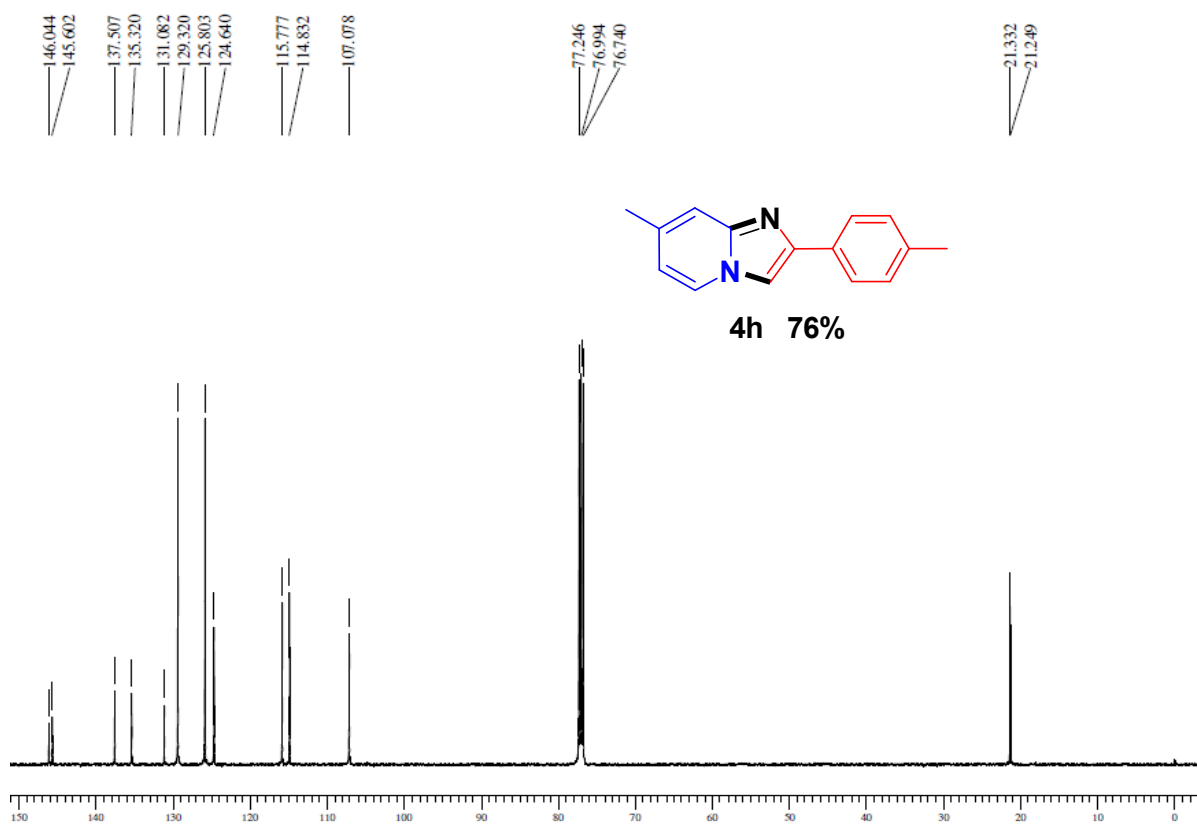

**HRMS (ESI)**

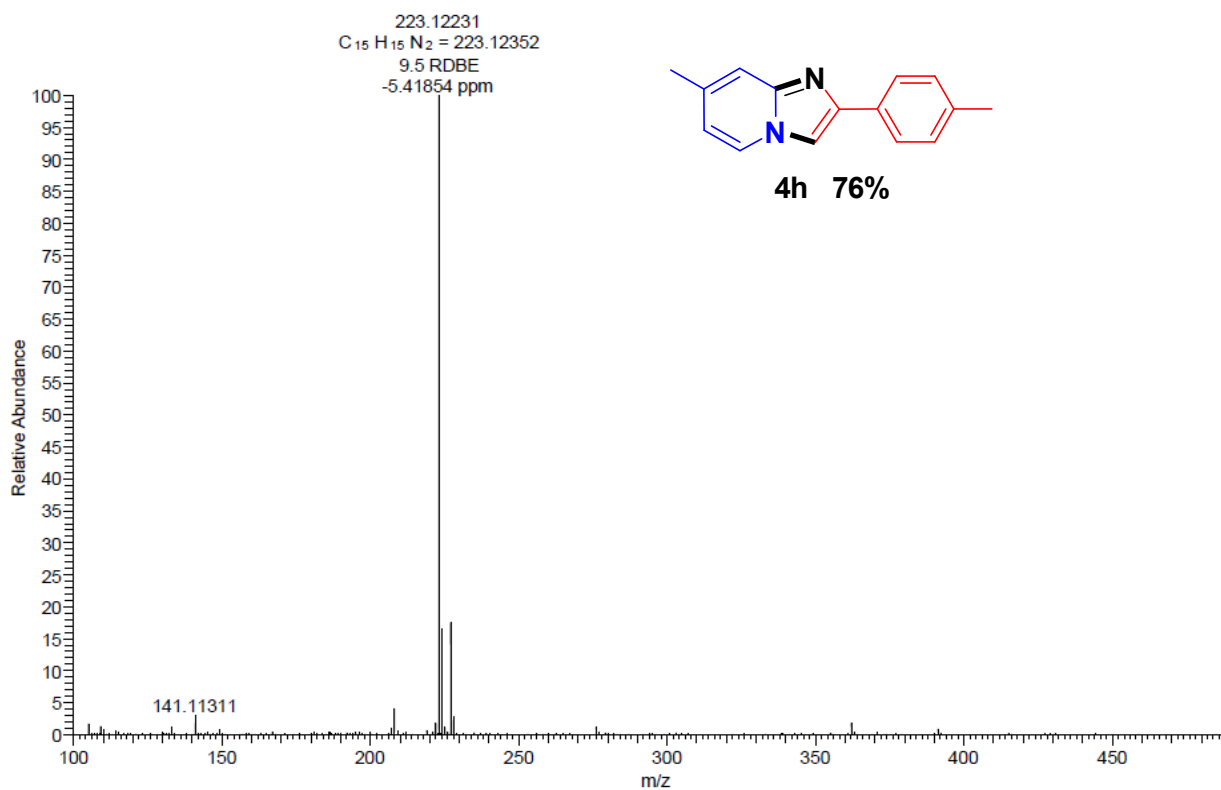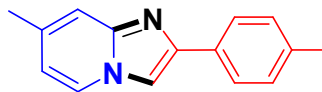

### Compound 4i

#### <sup>1</sup>H NMR (300 MHz, CDCl<sub>3</sub>)

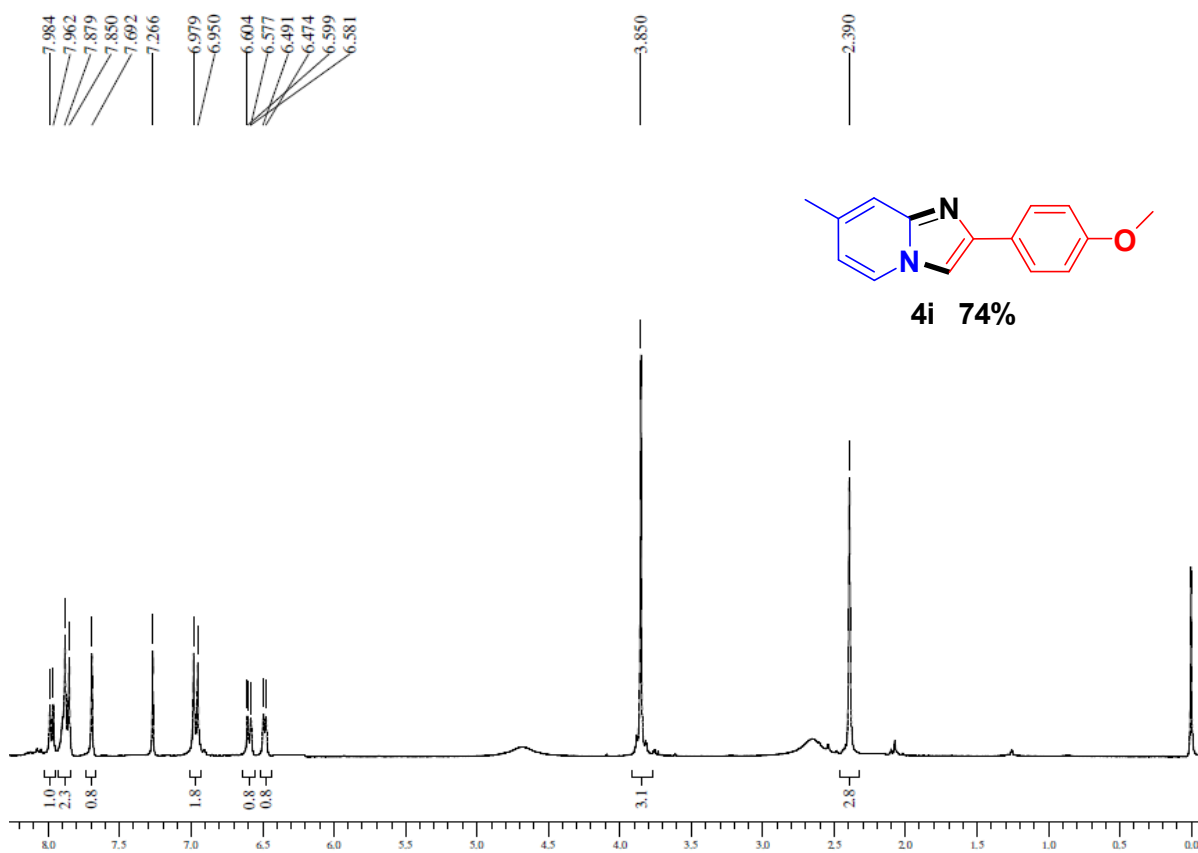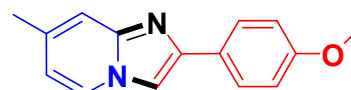

#### <sup>13</sup>C NMR (75 MHz, CDCl<sub>3</sub>)

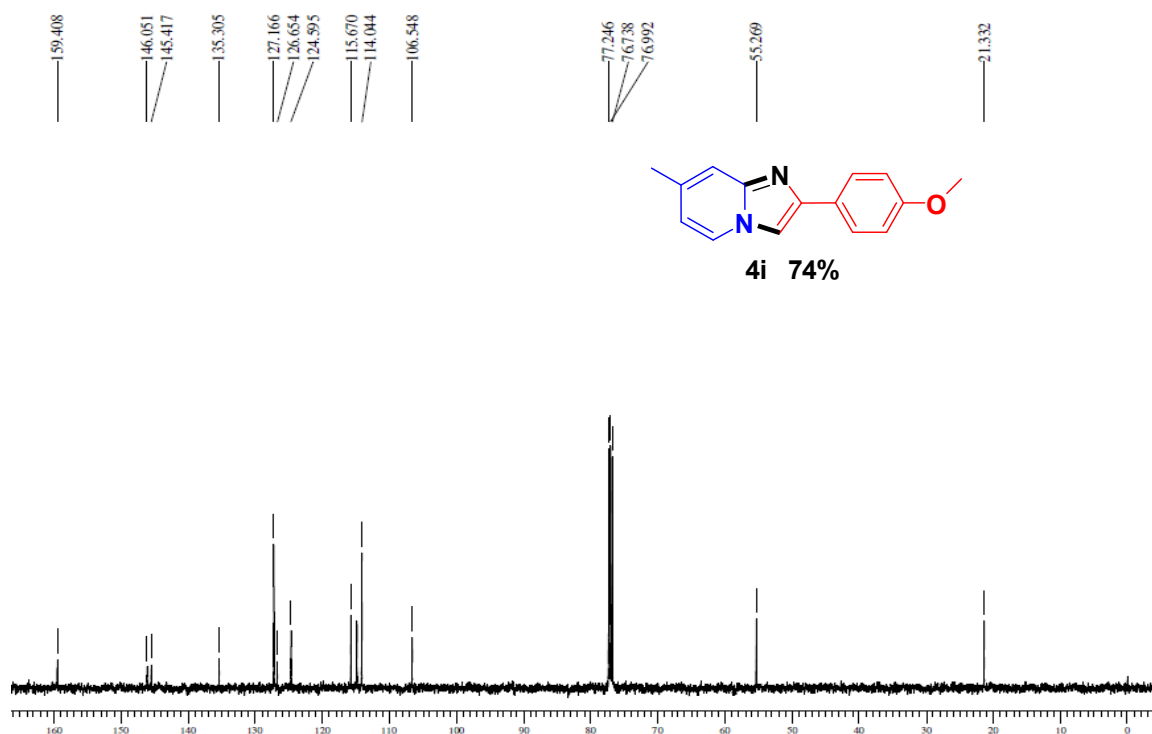

## HRMS (ESI)

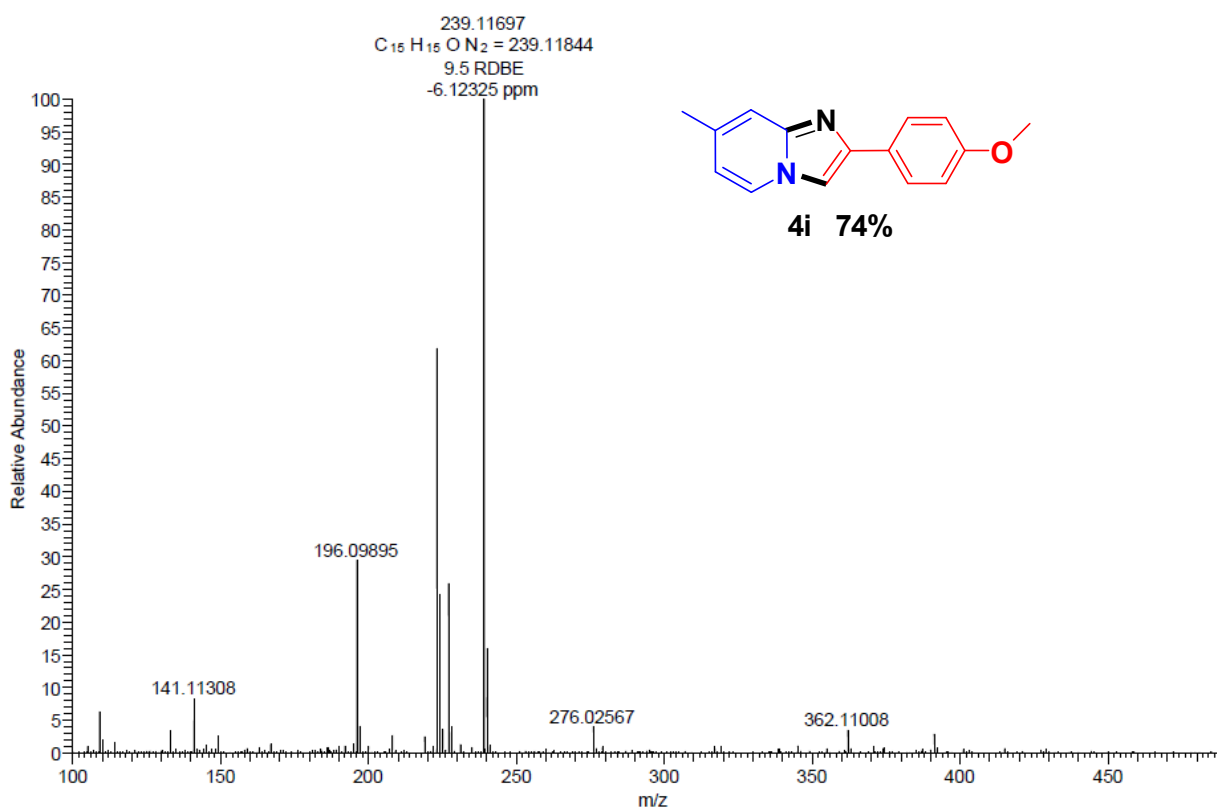

## Compound 4j



**<sup>1</sup>H NMR (300 MHz, CDCl<sub>3</sub>)**

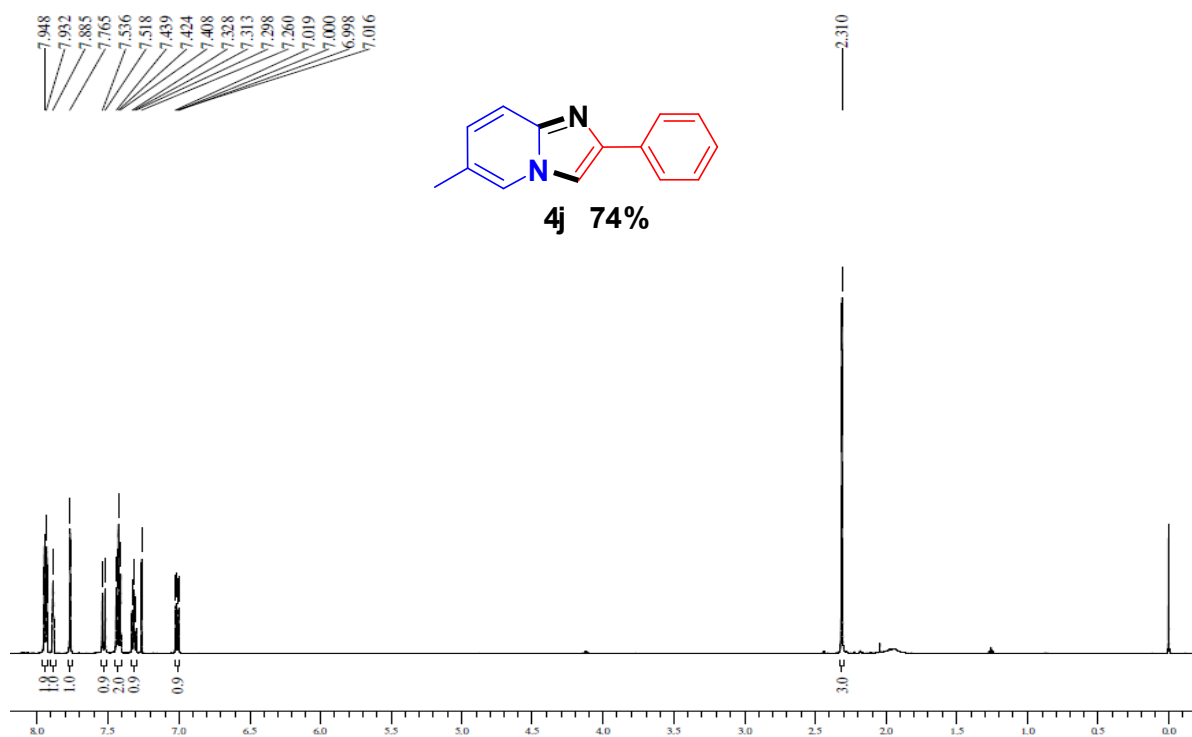

**<sup>13</sup>C NMR (75 MHz, CDCl<sub>3</sub>)**

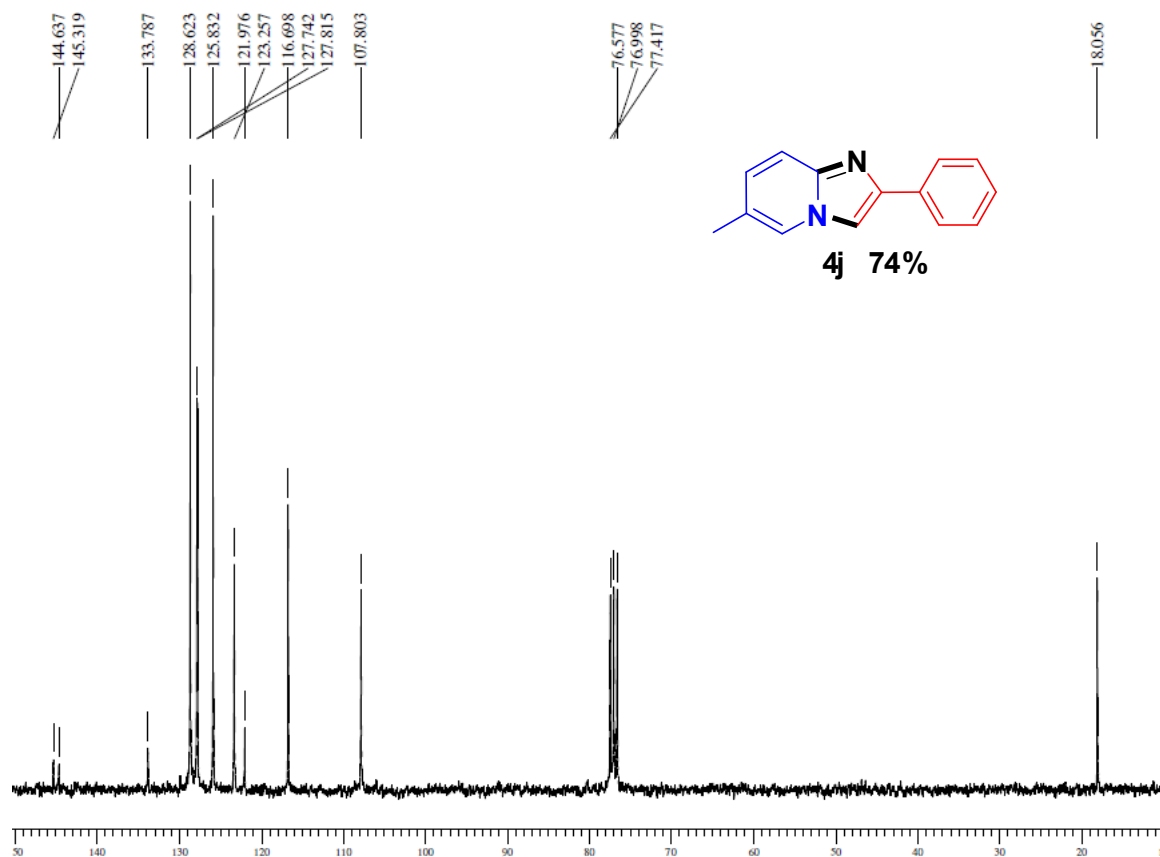

**HRMS (ESI)**

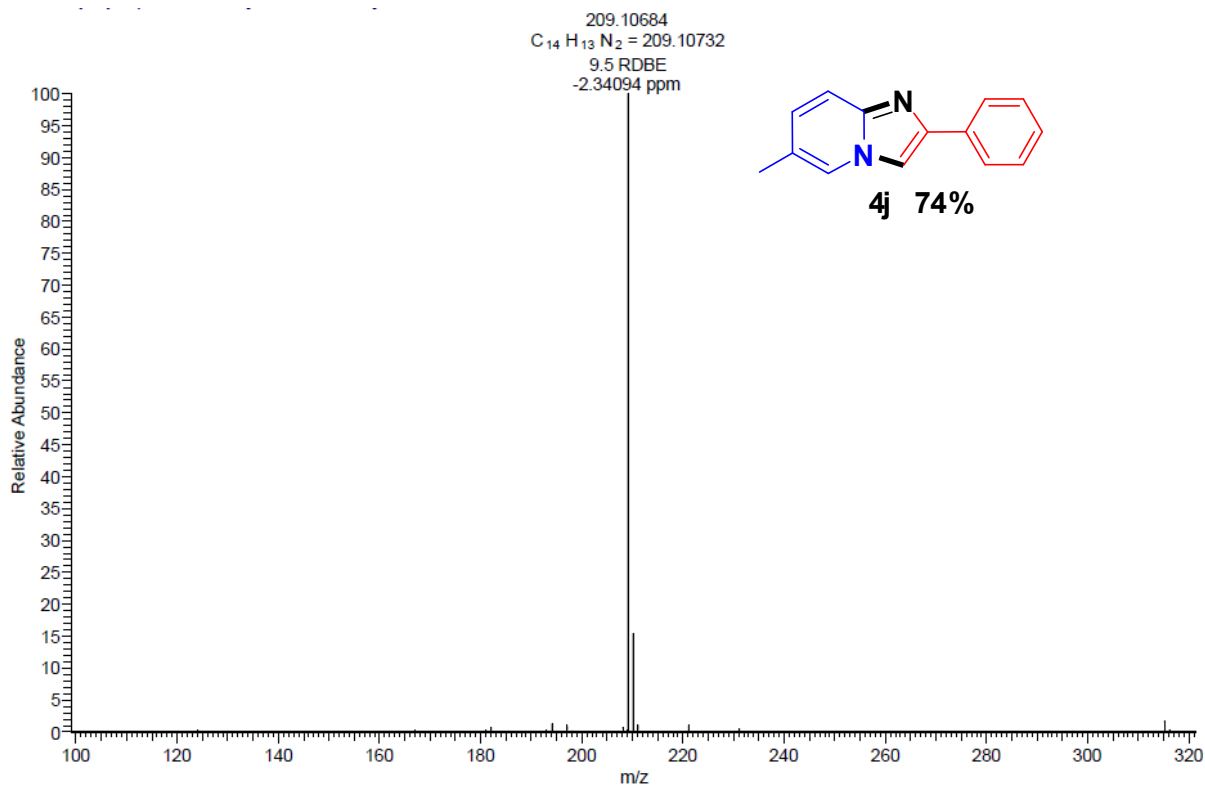

**Compound 4k**

**$^1H$  NMR (300 MHz,  $CDCl_3$ )**

7.916  
 7.913  
 7.906  
 7.899  
 7.888  
 7.717  
 7.711  
 7.524  
 7.506  
 7.129  
 7.127  
 7.112  
 7.110  
 7.094  
 7.092  
 7.030  
 7.012

2.318

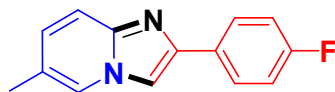

**4k 77%**

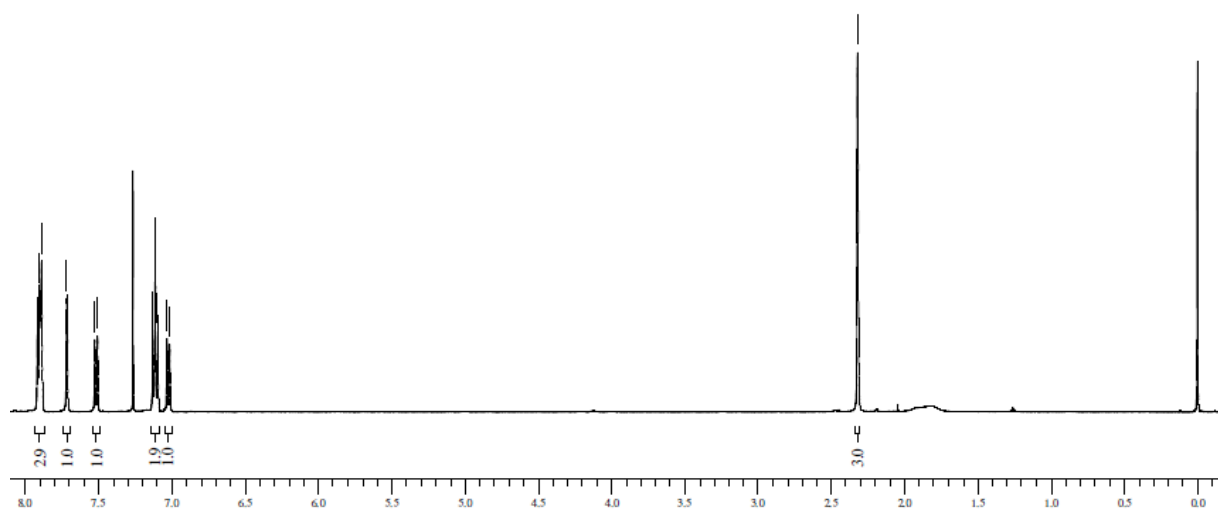

**$^{13}C$  NMR (75 MHz,  $CDCl_3$ )**

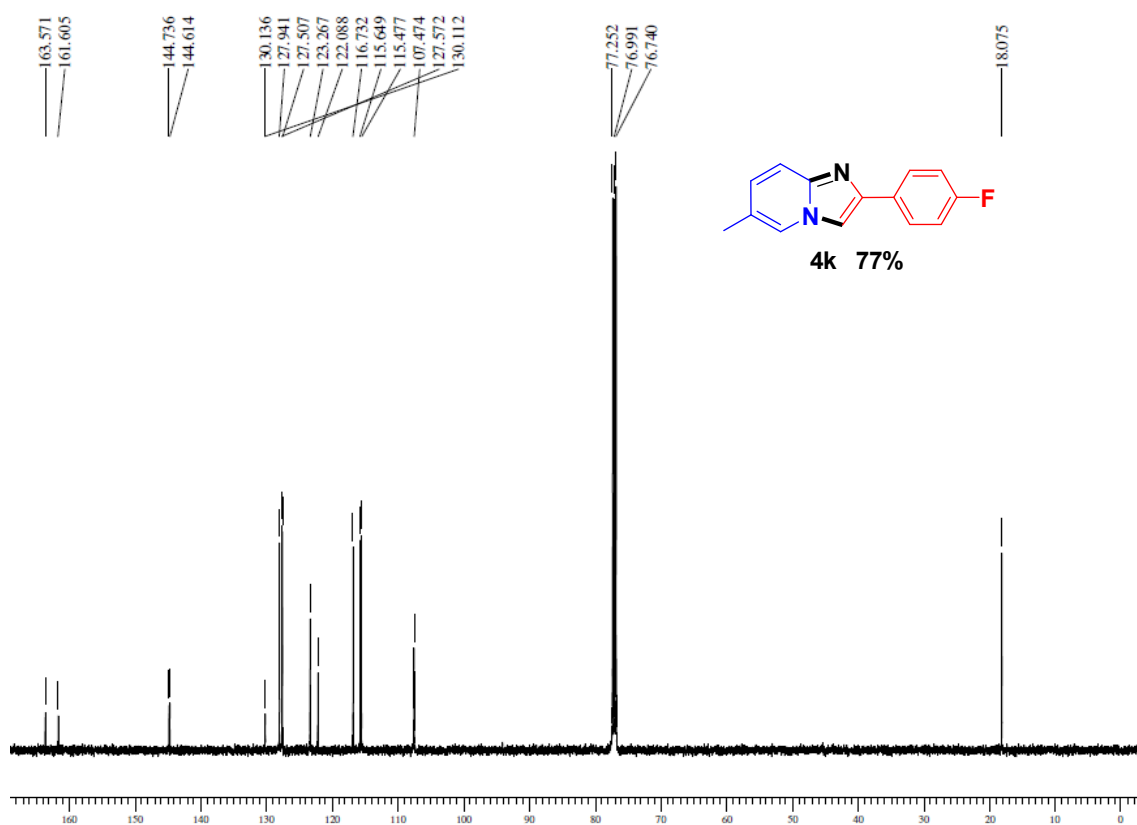

### HRMS (ESI)

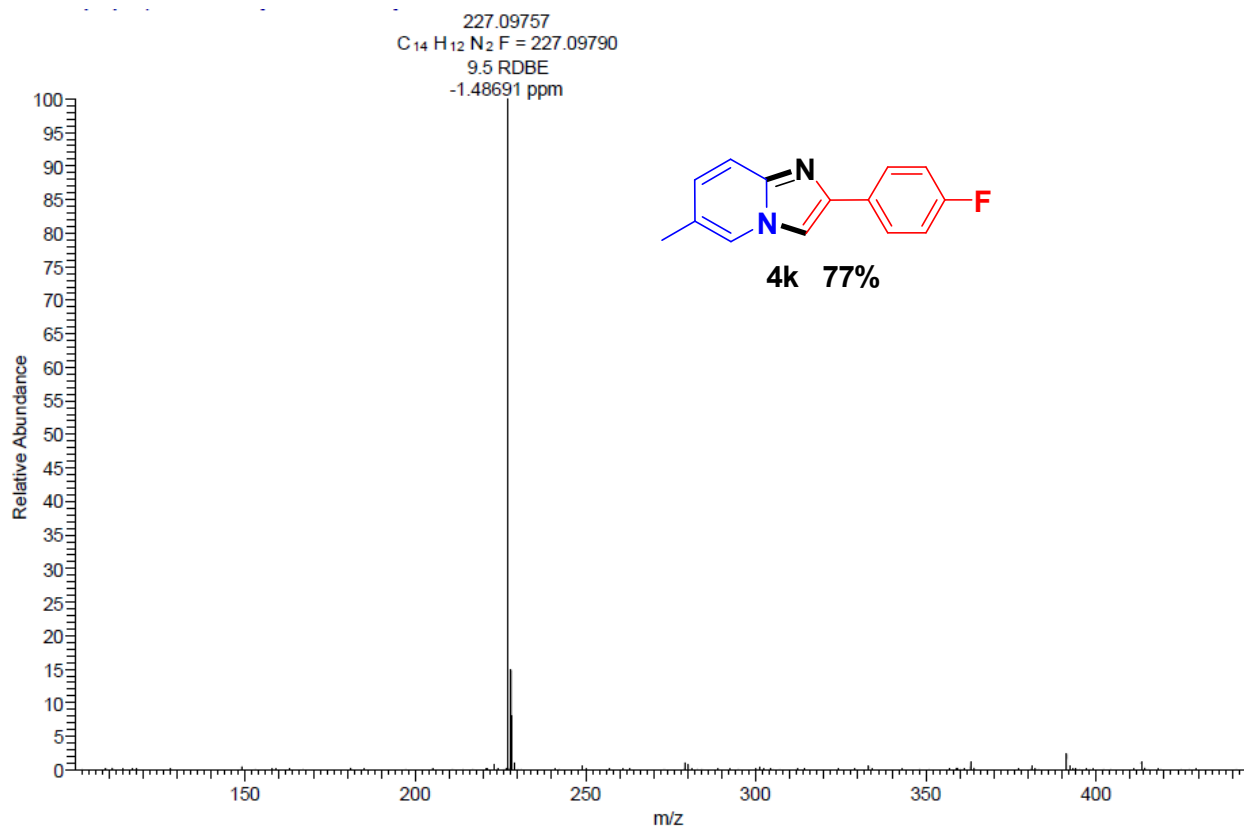

### Compound 4l

### <sup>1</sup>H NMR (300 MHz, CDCl<sub>3</sub>)

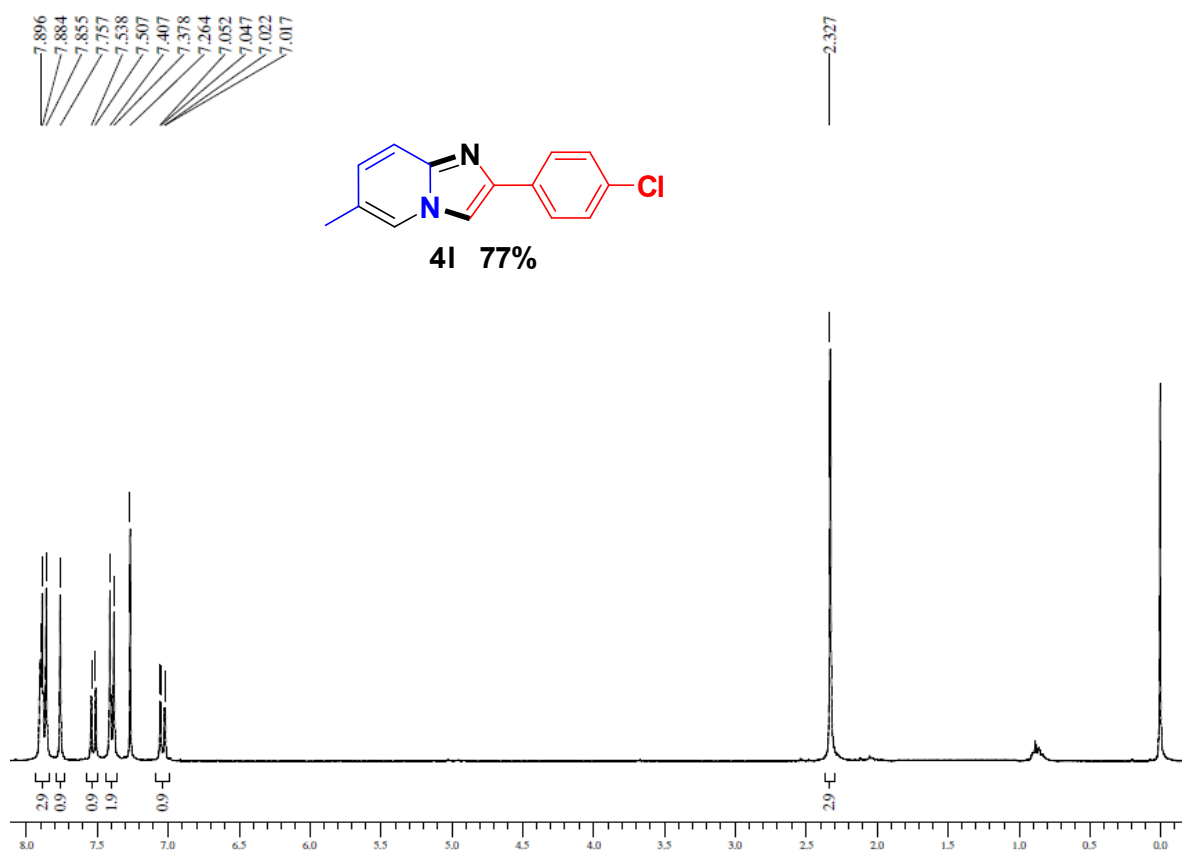

### <sup>13</sup>C NMR (75 MHz, CDCl<sub>3</sub>)

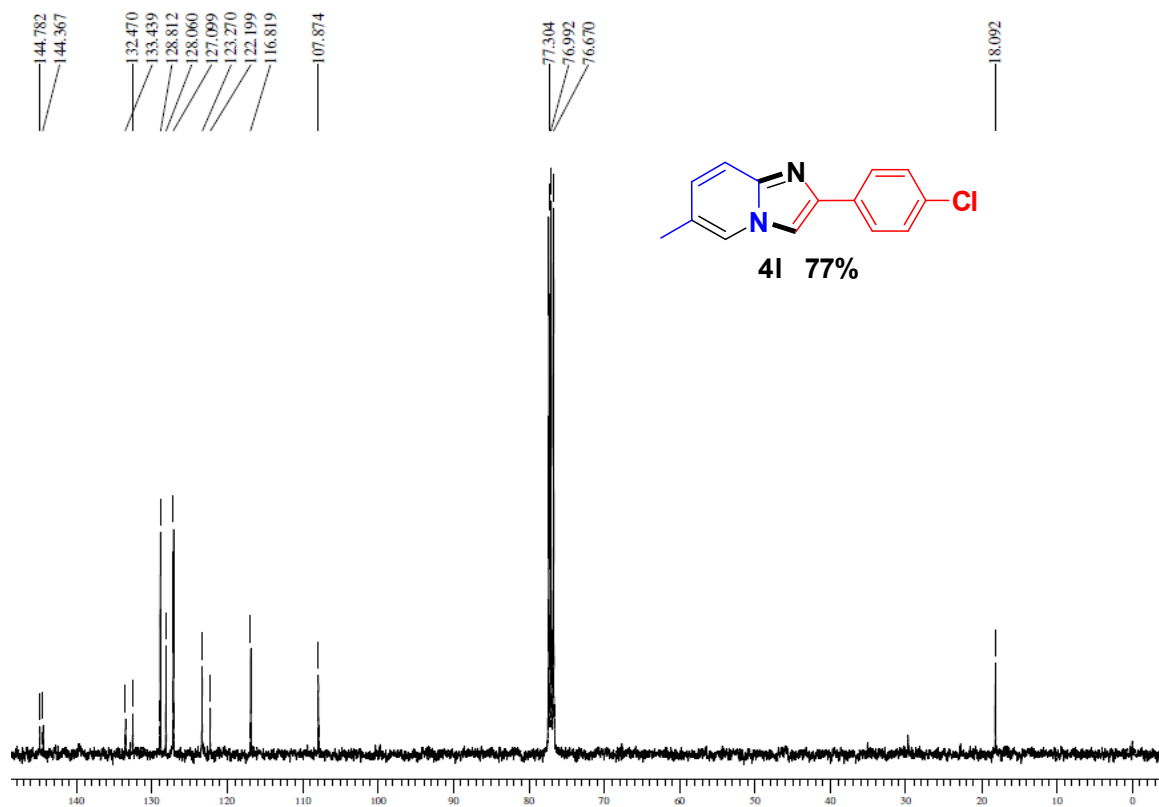

### HRMS (ESI)

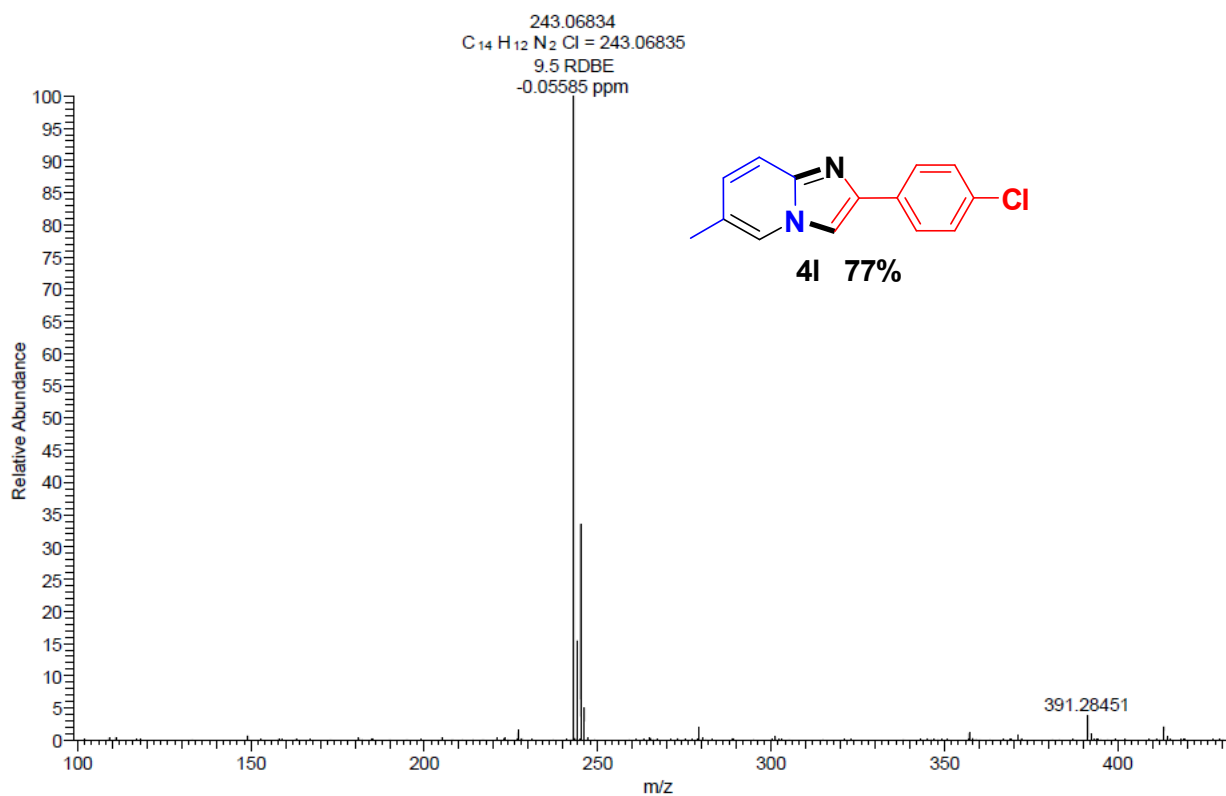

**Compound 4m**

**<sup>1</sup>H NMR (300 MHz, CDCl<sub>3</sub>)**

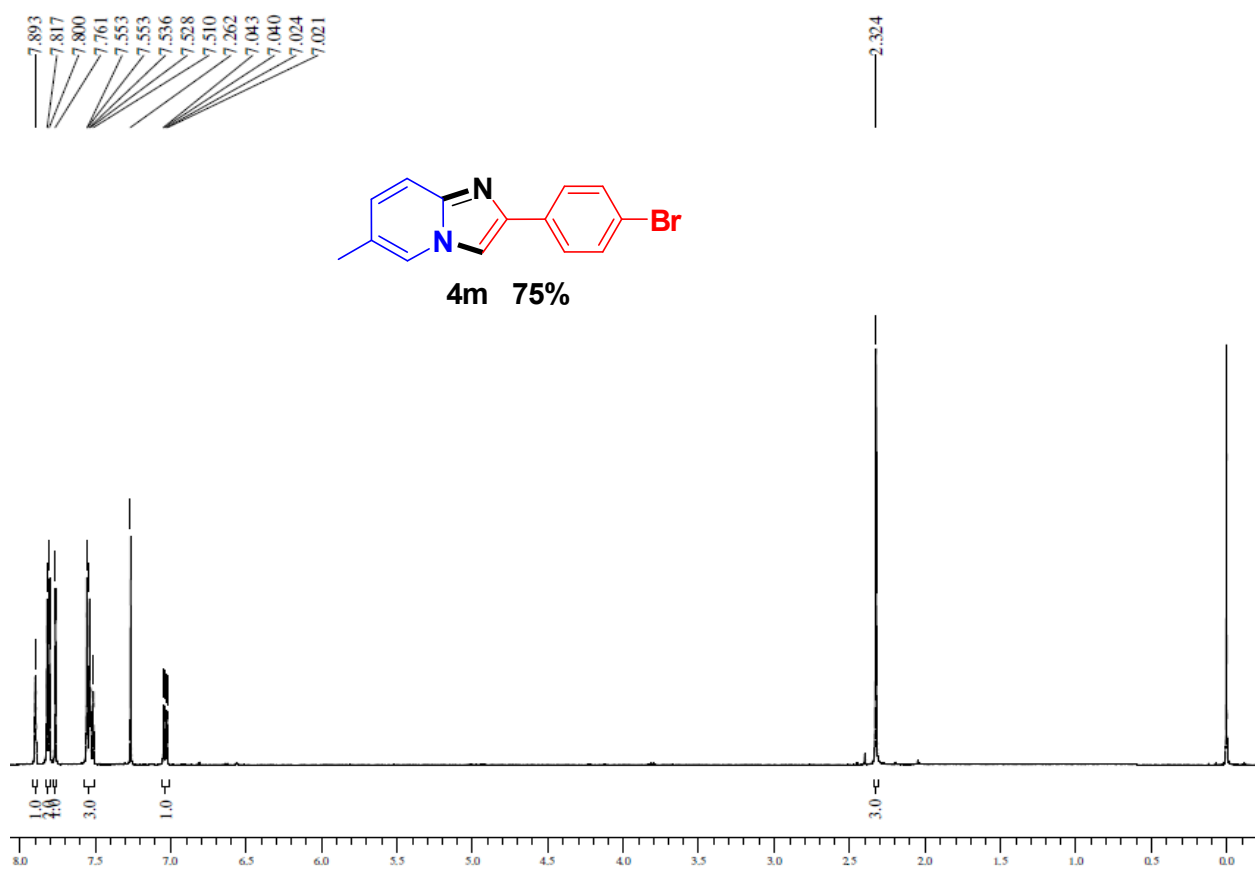

**<sup>13</sup>C NMR (75 MHz, CDCl<sub>3</sub>)**

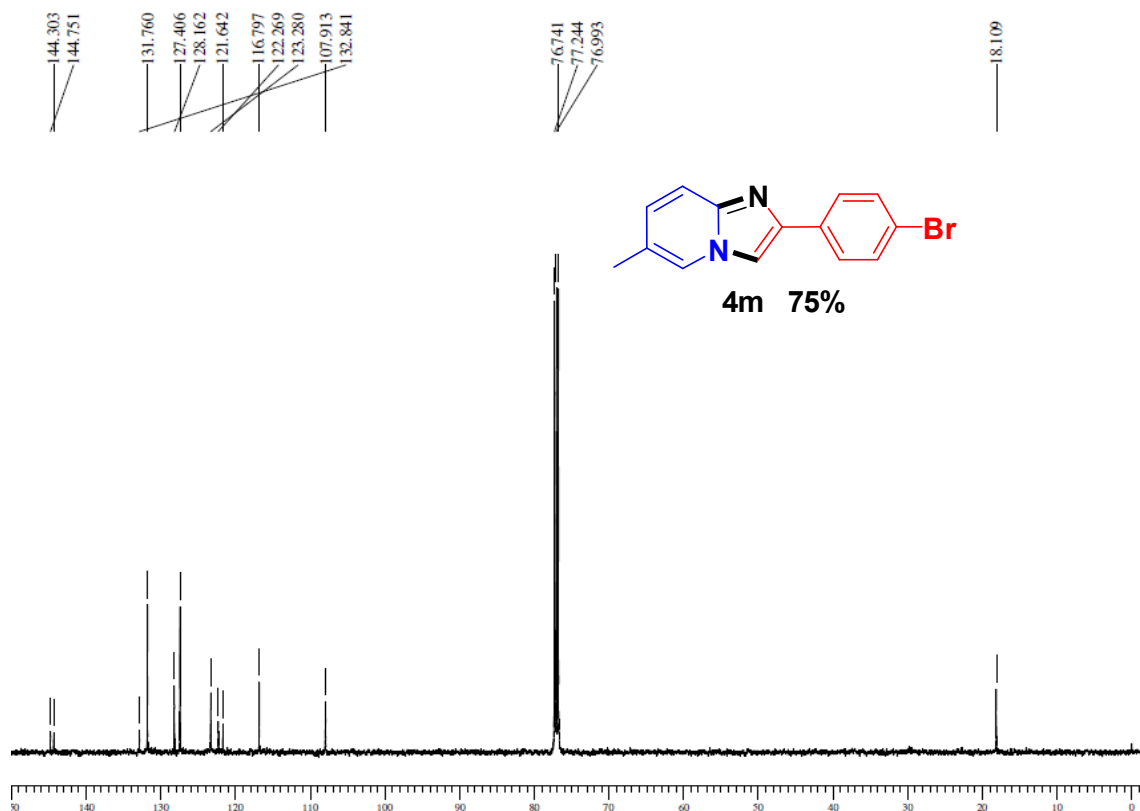

### HRMS (ESI)

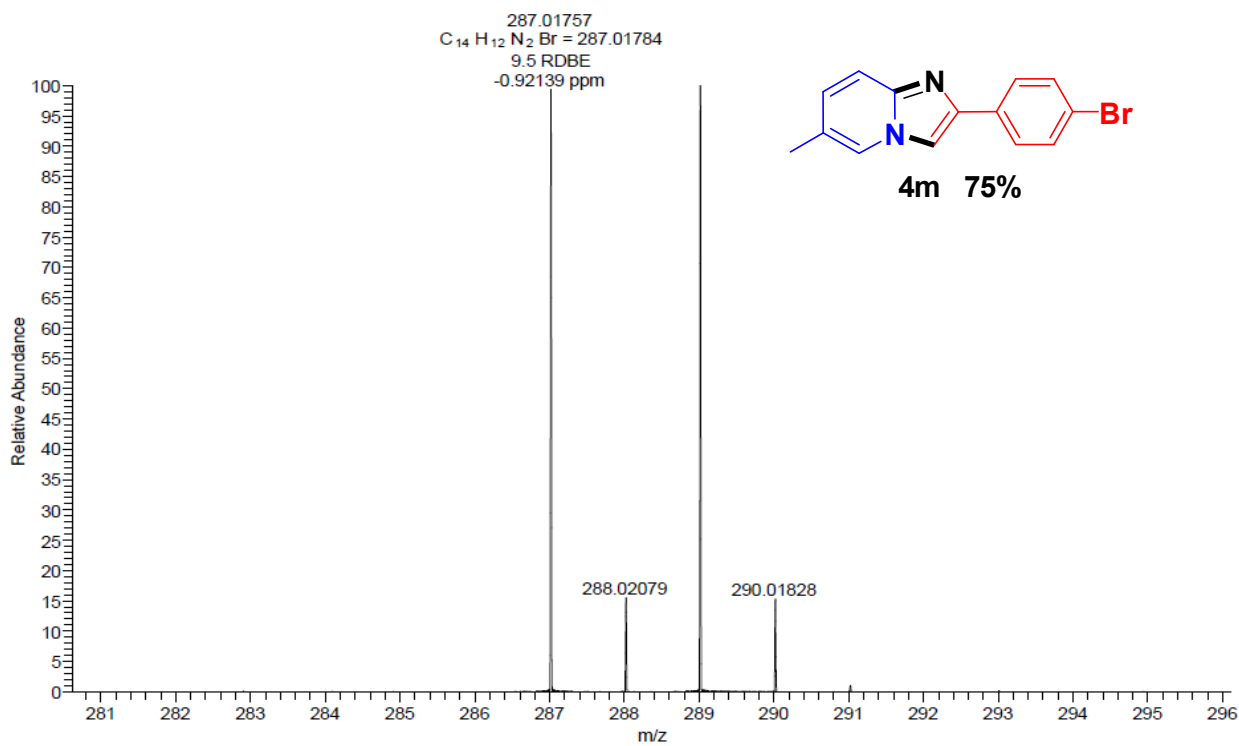

### Compound 4n

**<sup>1</sup>H NMR (300 MHz, CDCl<sub>3</sub>)**

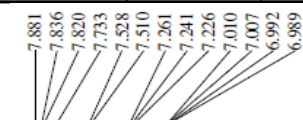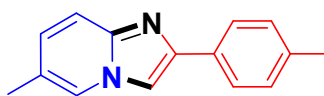

**4n 72%**

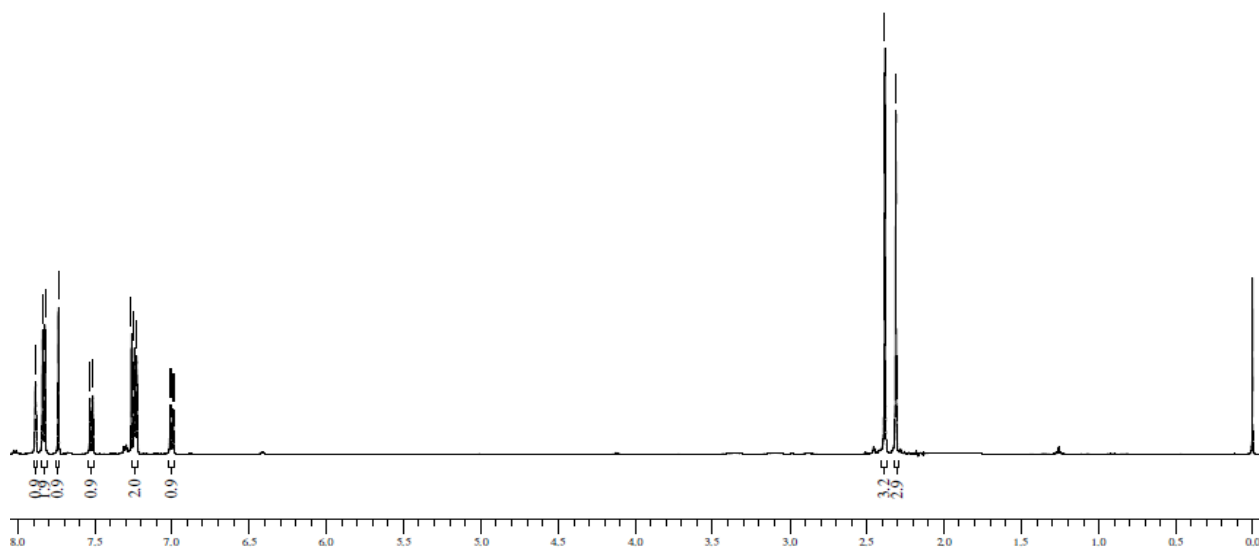

**<sup>13</sup>C NMR (75 MHz, CDCl<sub>3</sub>)**

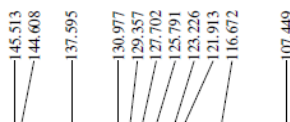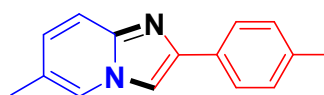

**4n 72%**

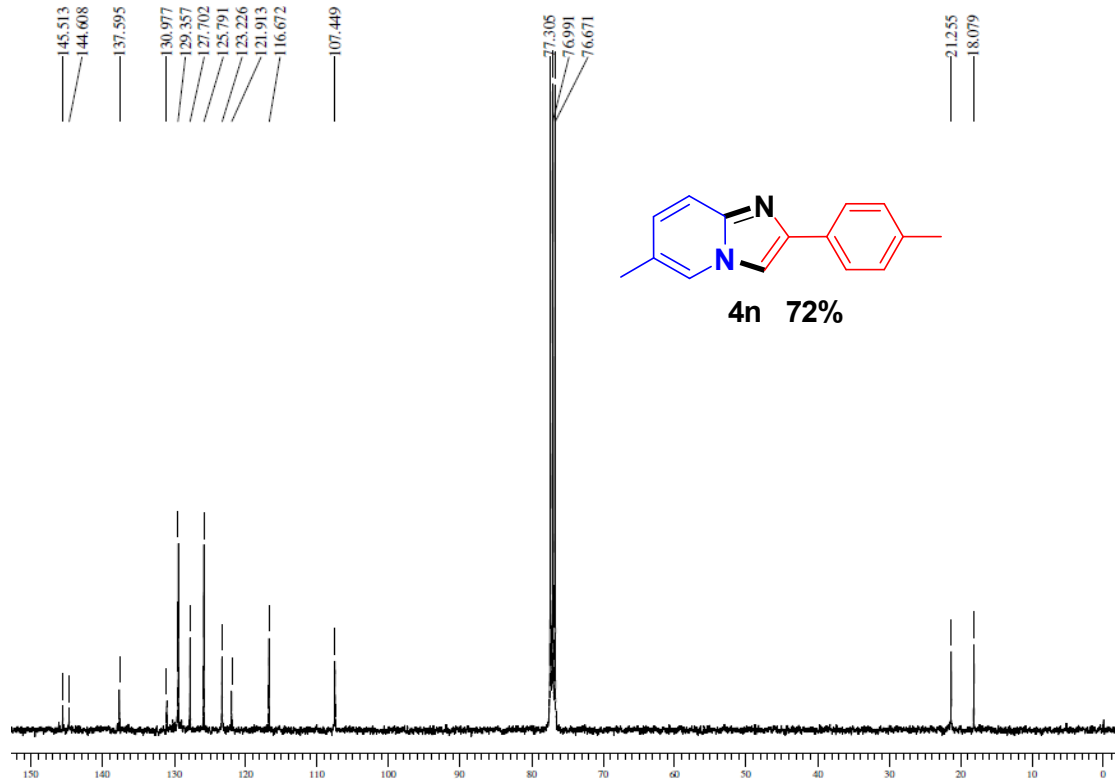

**HRMS (ESI)**

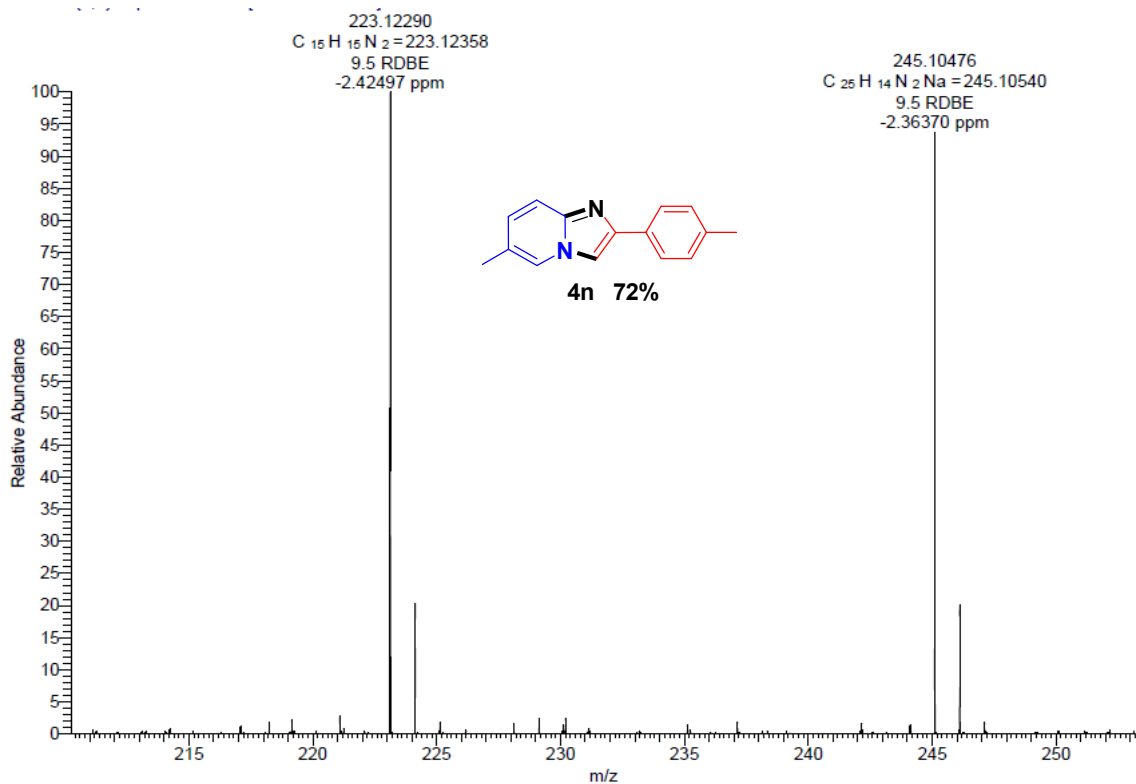

### Compound 4o

#### <sup>1</sup>H NMR (300 MHz, CDCl<sub>3</sub>)

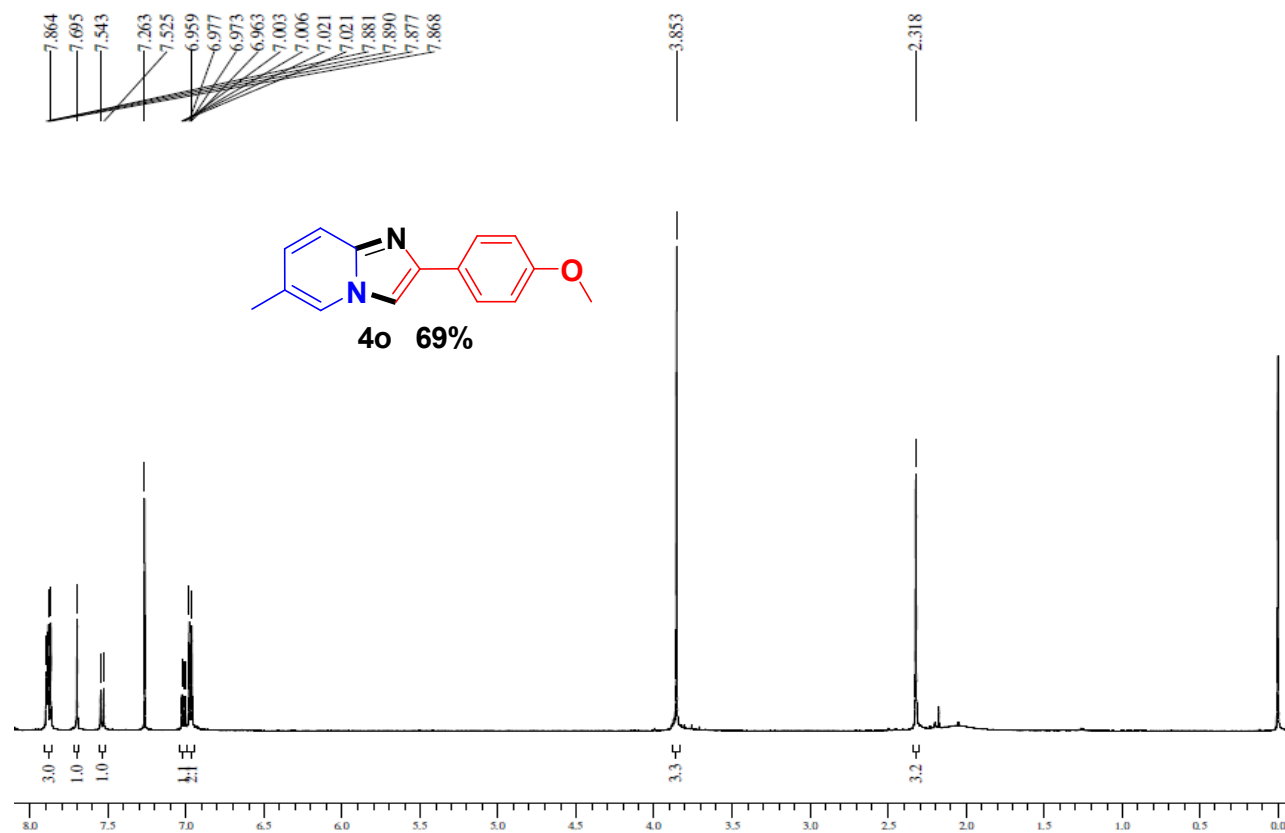

#### <sup>13</sup>C NMR (75 MHz, CDCl<sub>3</sub>)



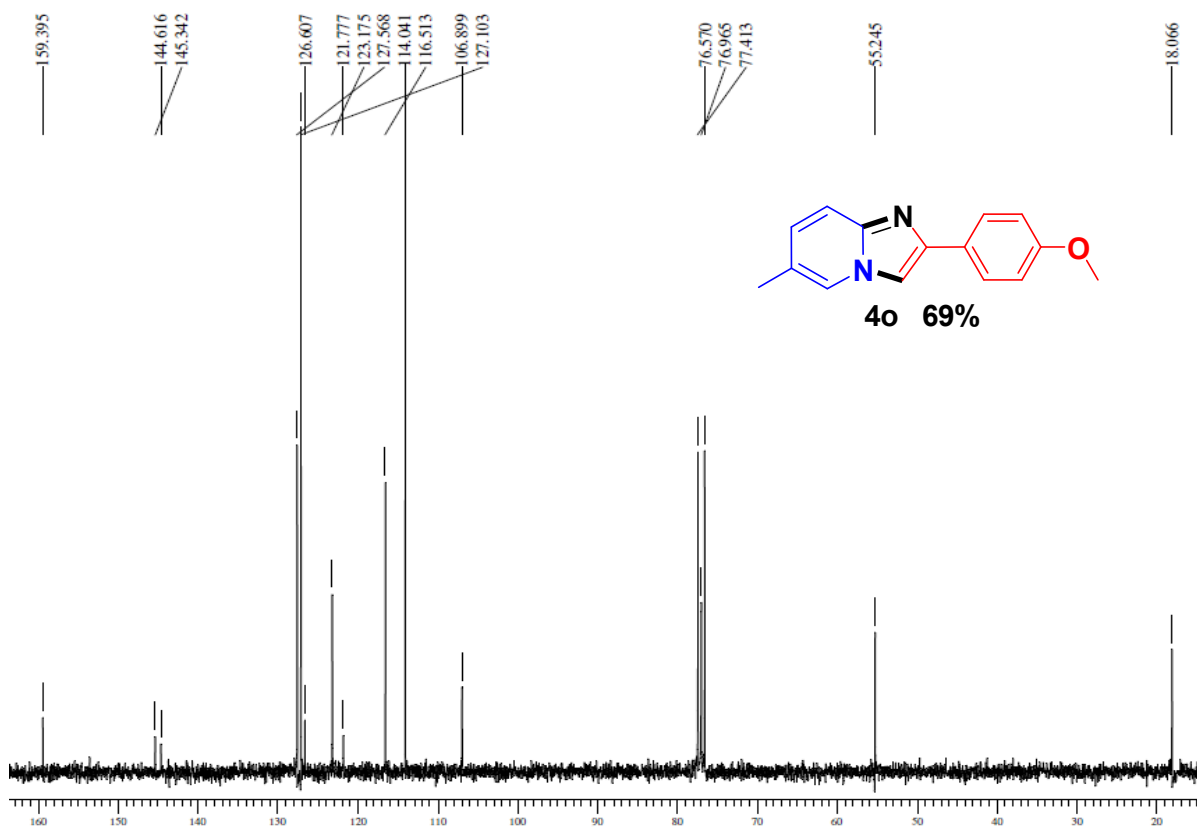

### HRMS (ESI)

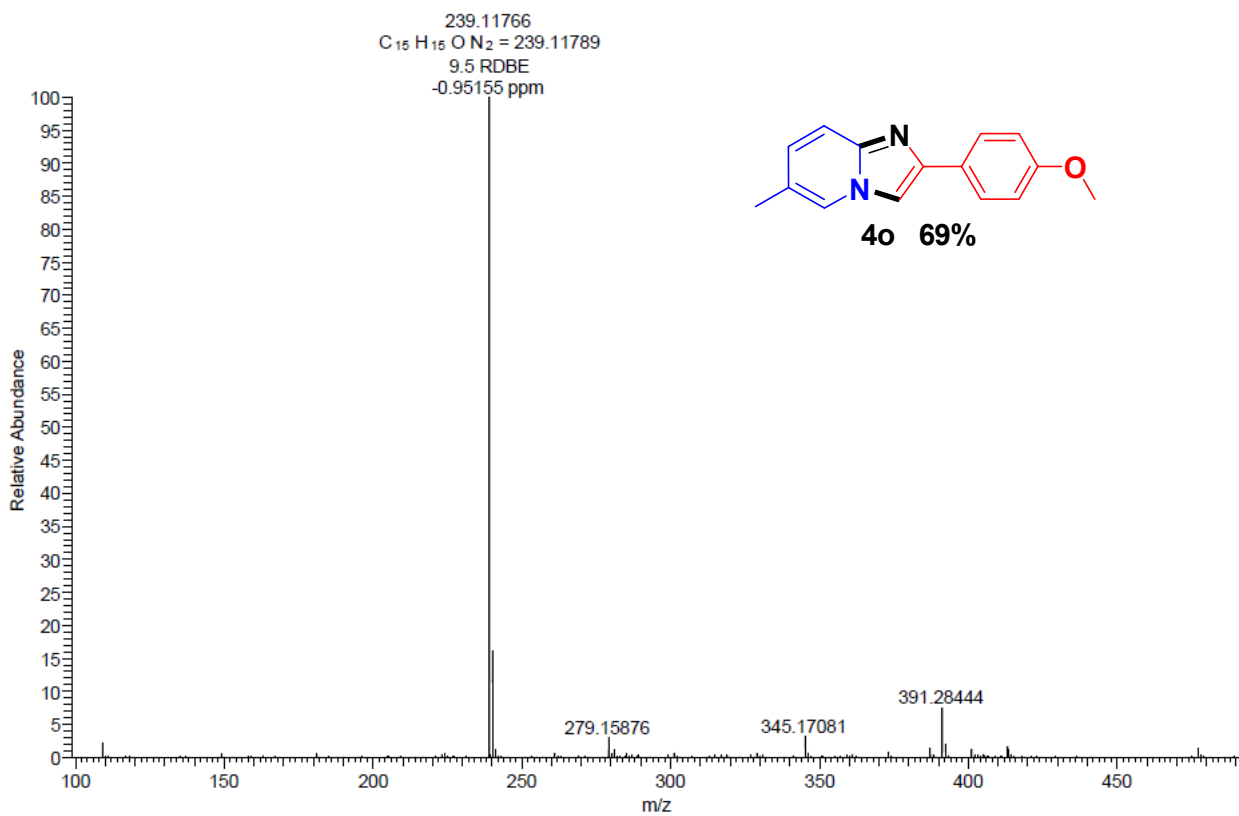

### Compound 4p

<sup>1</sup>H NMR (300 MHz, CDCl<sub>3</sub>)

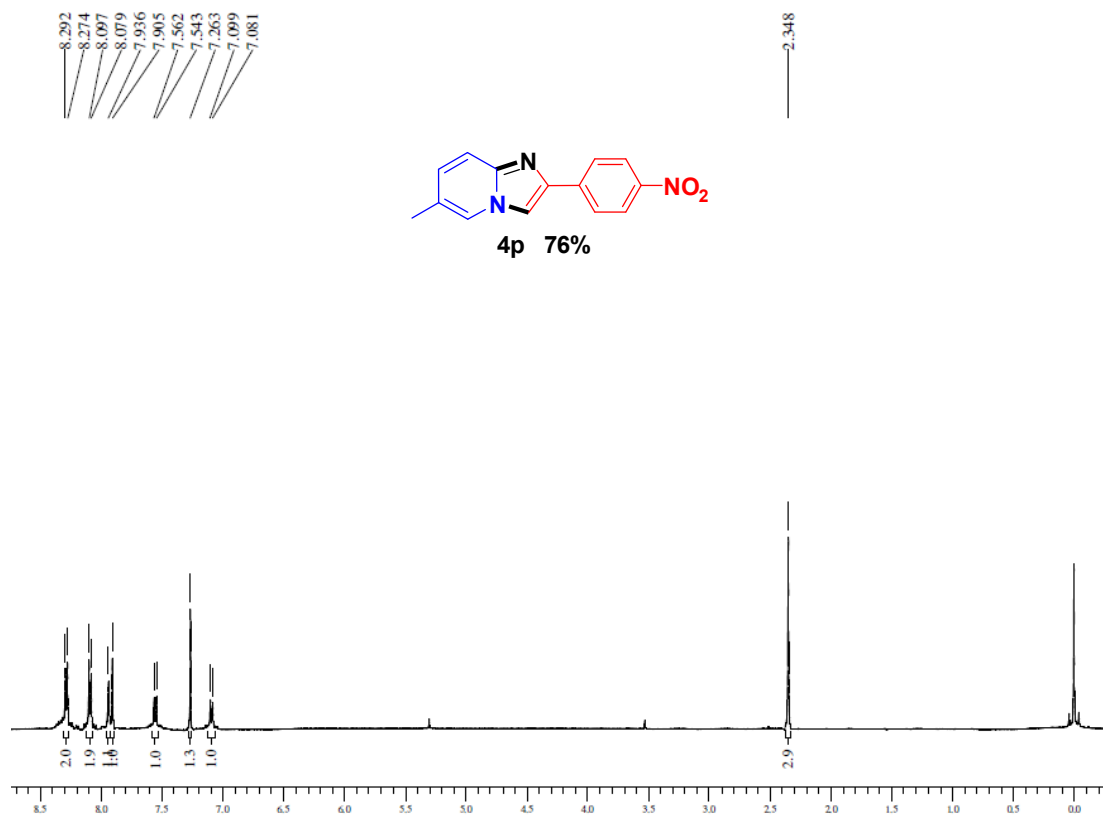

**<sup>13</sup>C NMR (75 MHz, CDCl<sub>3</sub>)**

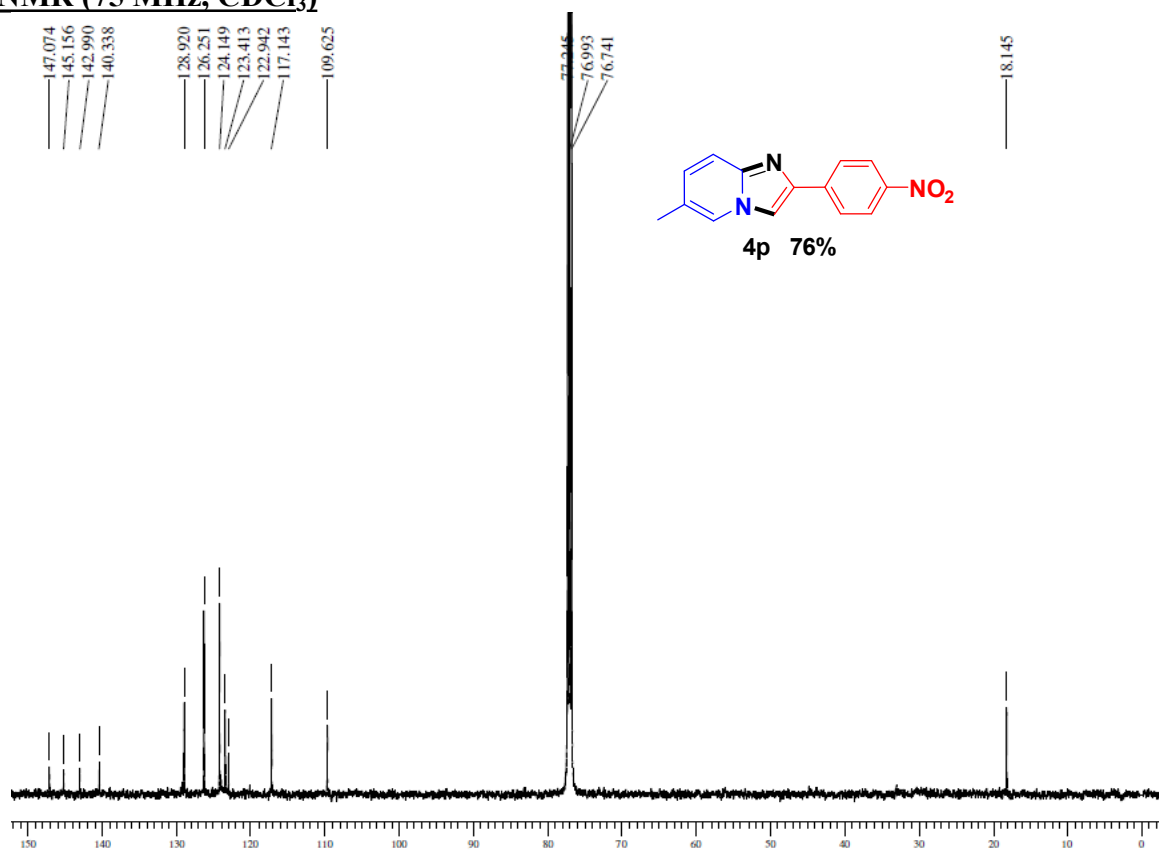

**HRMS (ESI)**

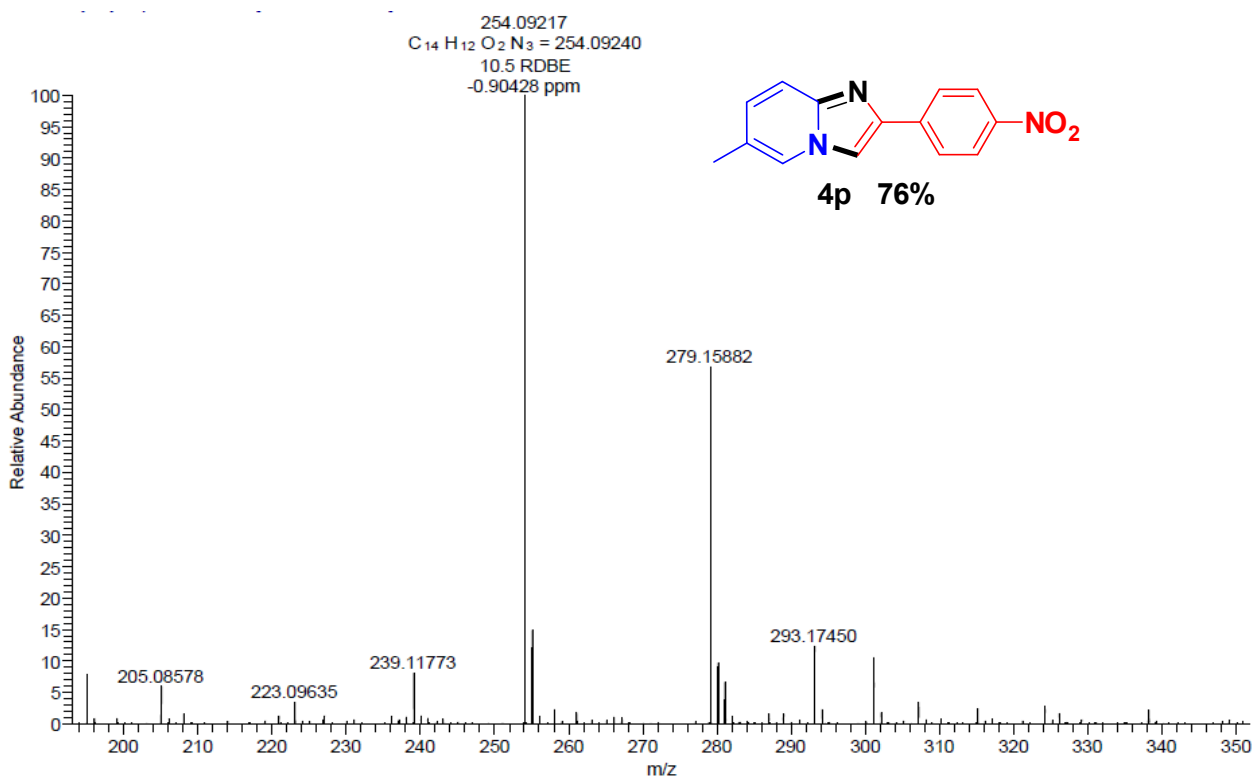

### Compound 4q

#### $^1H$ NMR (300 MHz, $CDCl_3$ )

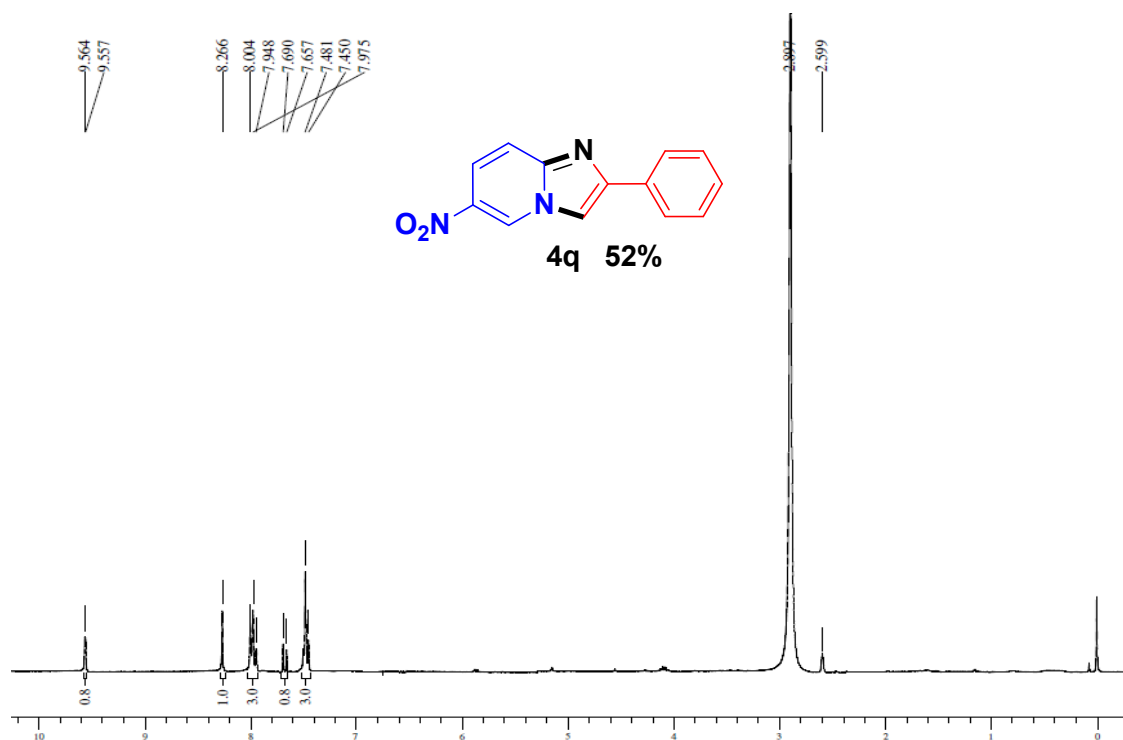

#### $^{13}C$ NMR (75 MHz, $CDCl_3$ )

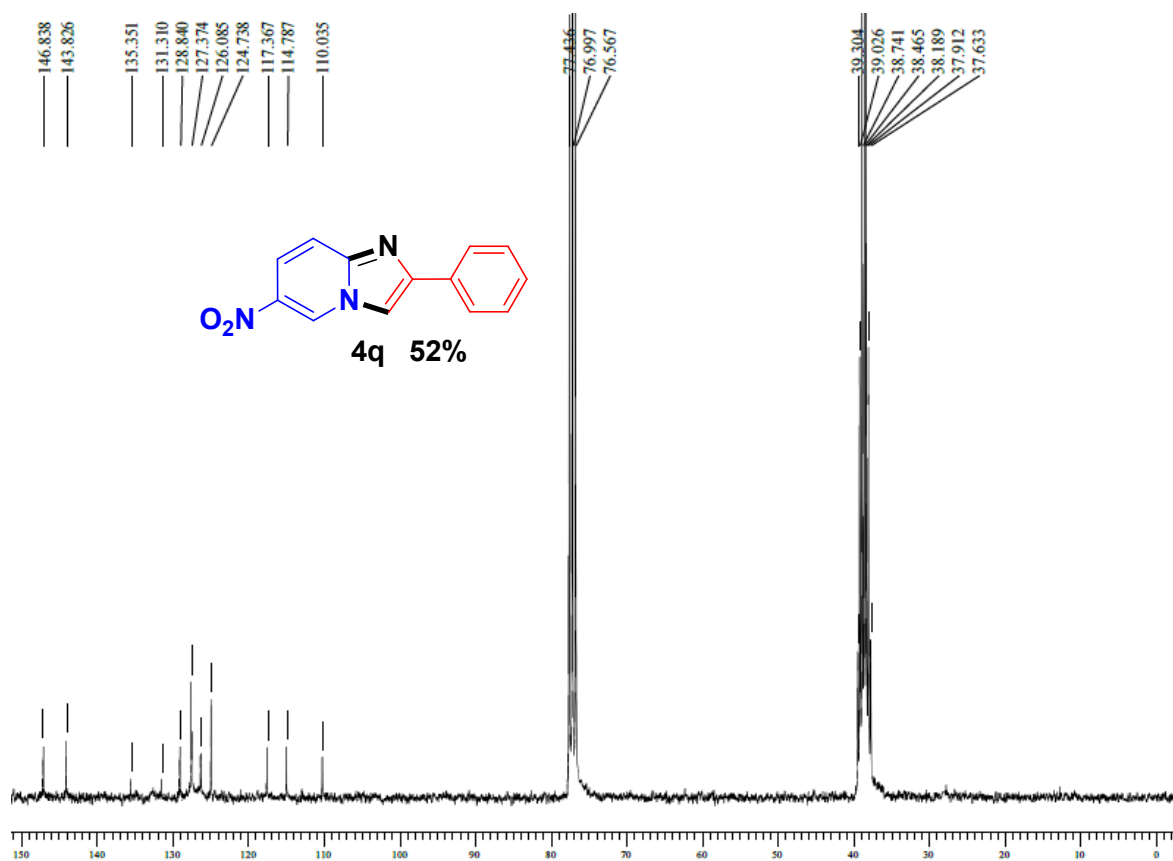

### HRMS (ESI)

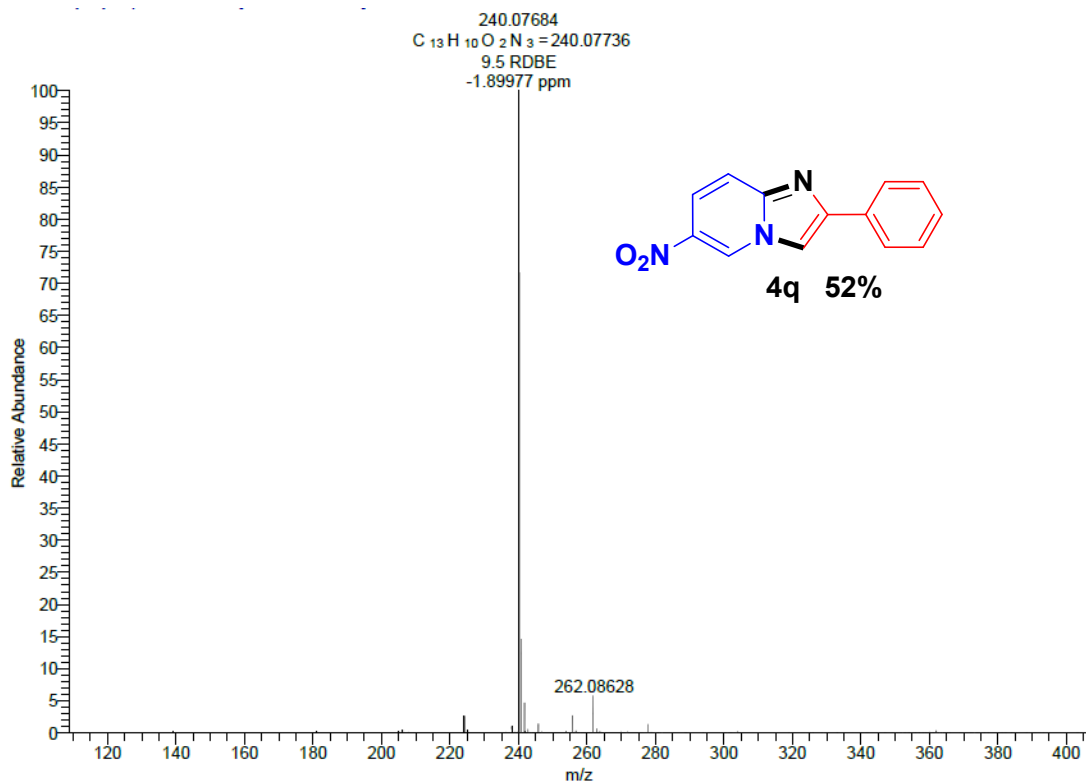

### Compound 4r

### <sup>1</sup>H NMR (300 MHz, CDCl<sub>3</sub>)

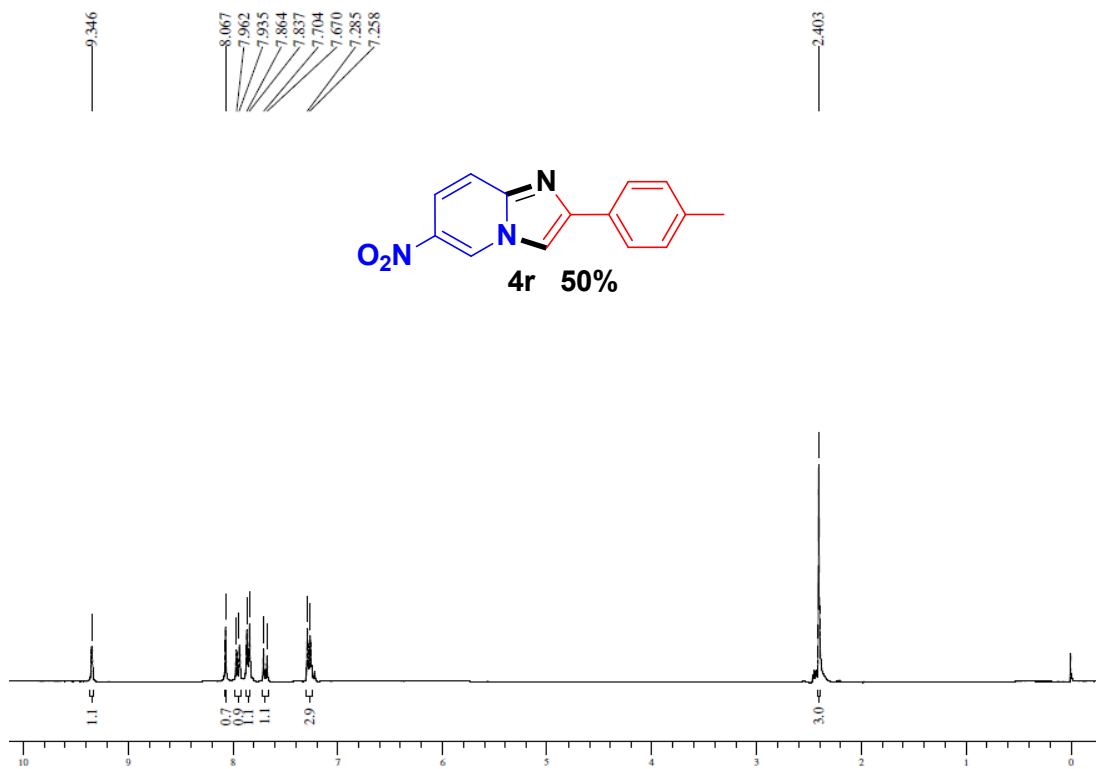

**<sup>13</sup>C NMR (75 MHz, CDCl<sub>3</sub>)**

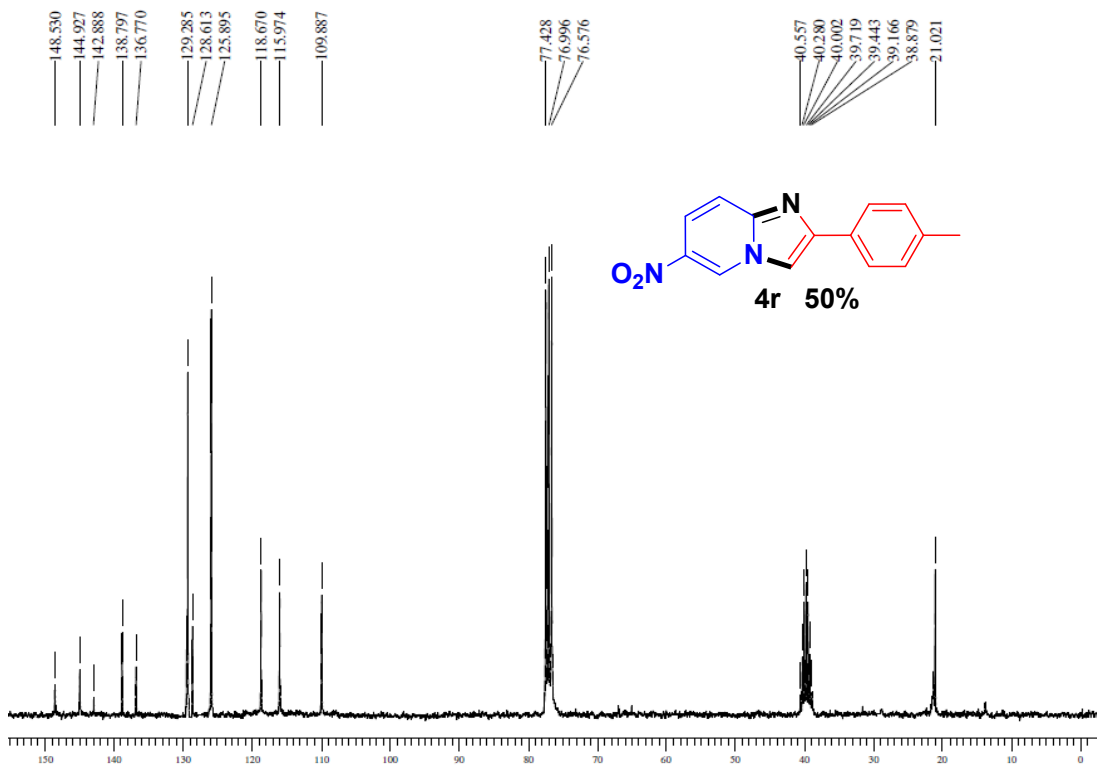

**HRMS (ESI)**

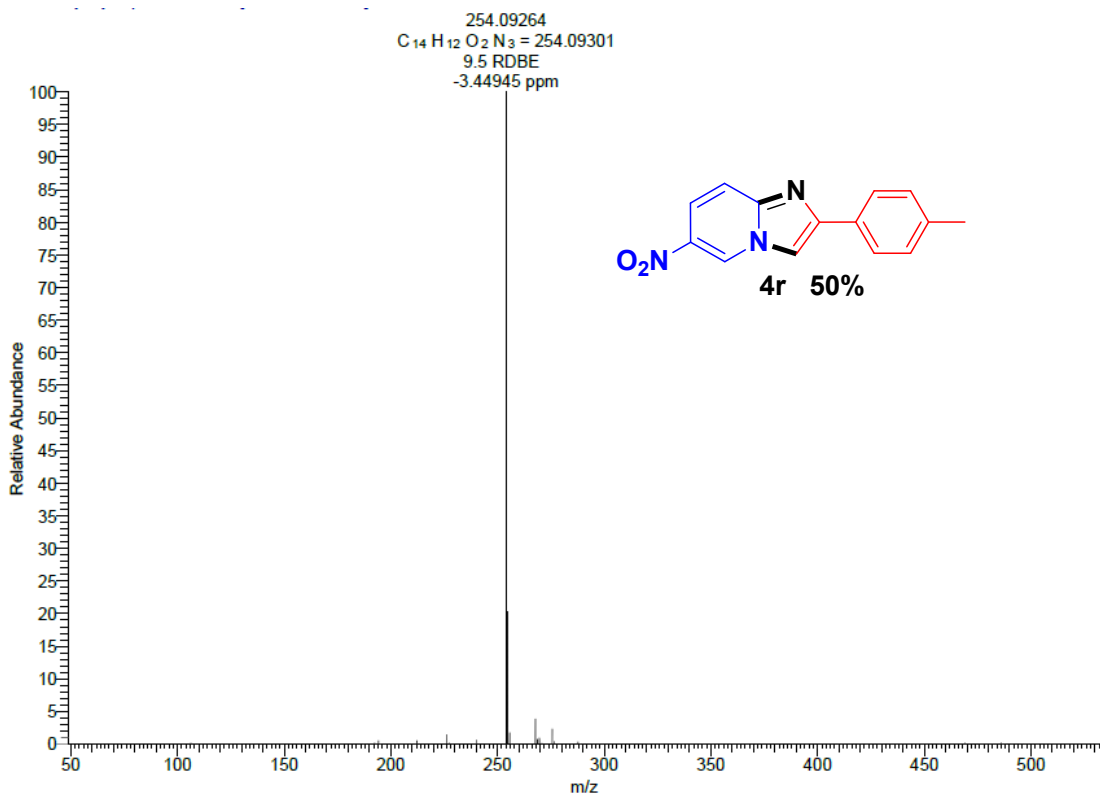

**Compound 4s**

**<sup>1</sup>H NMR (300 MHz, CDCl<sub>3</sub>)**

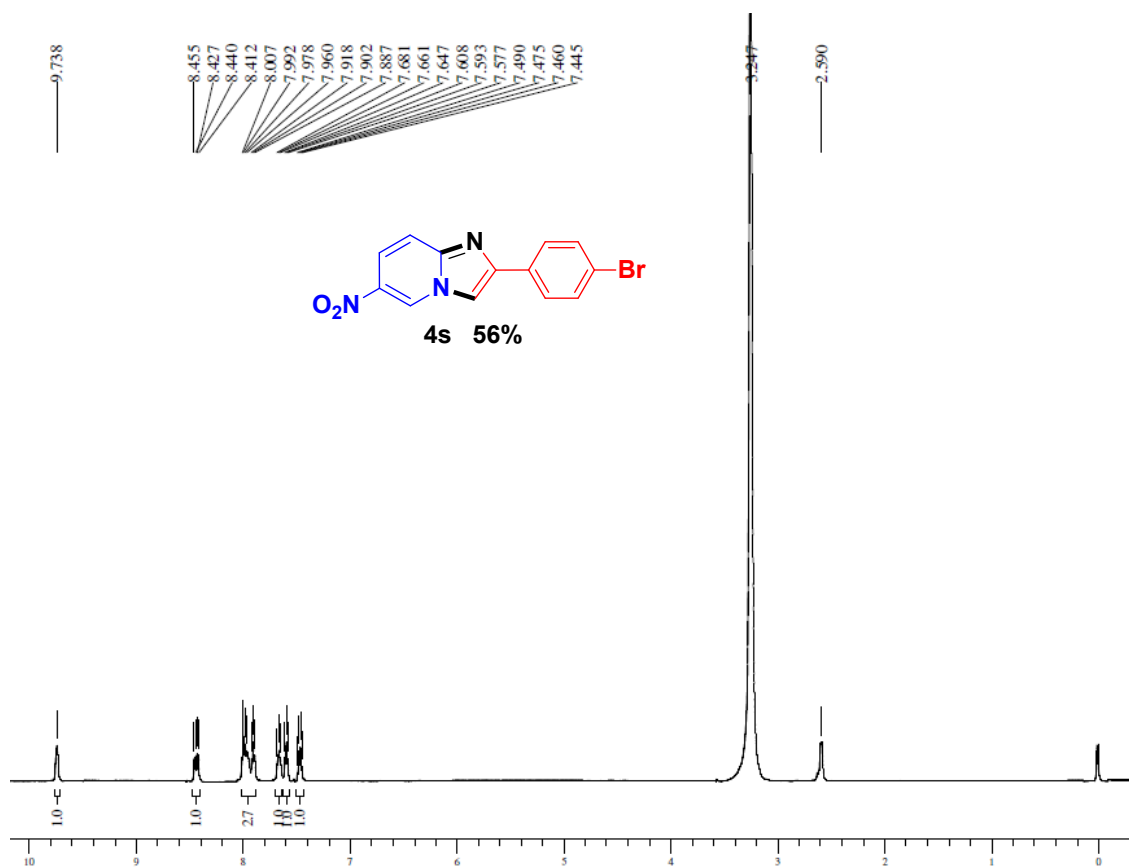

**<sup>13</sup>C NMR (75 MHz, CDCl<sub>3</sub>)**

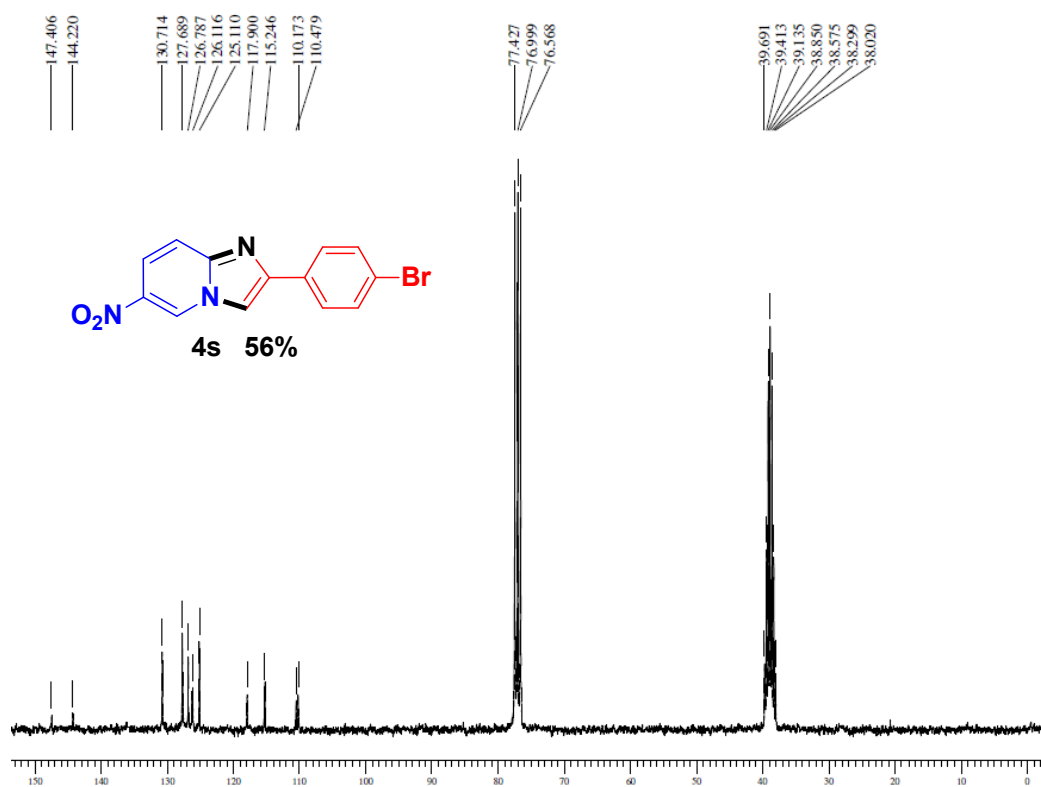

**HRMS (ESI)**

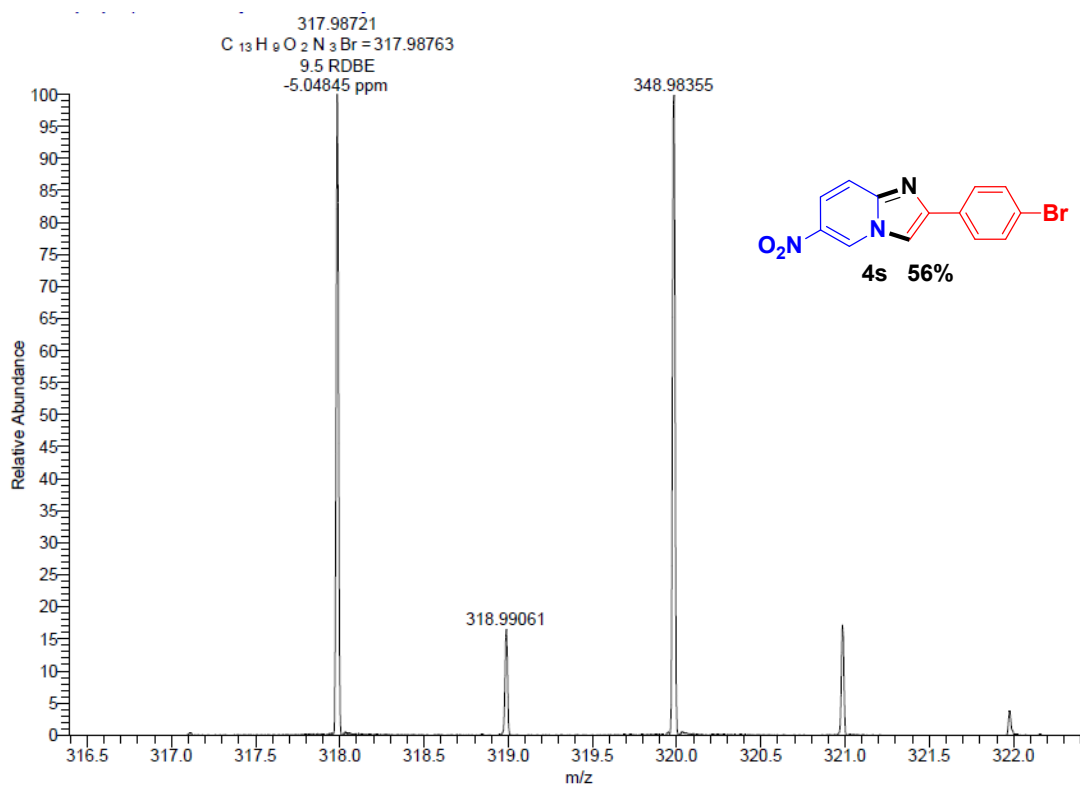

**Compound 6a**

**<sup>1</sup>H NMR (300 MHz, CDCl<sub>3</sub>)**

7.840  
7.816  
7.750  
7.444  
7.430  
7.406  
7.380  
7.309  
7.284  
7.262  
6.835  
6.820

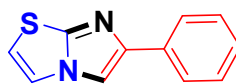

6a 86%

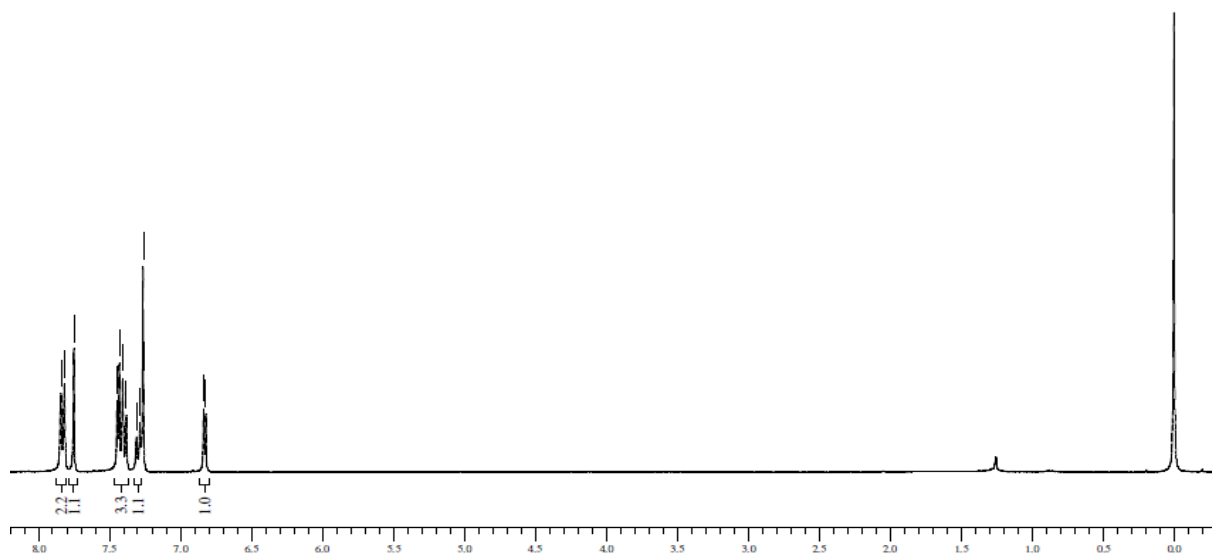

**<sup>13</sup>C NMR (75 MHz, CDCl<sub>3</sub>)**

150.143  
147.844  
134.047  
128.628  
127.344  
125.173  
118.424  
112.408  
107.887

77.305  
76.991  
76.672

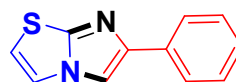

6a 86%

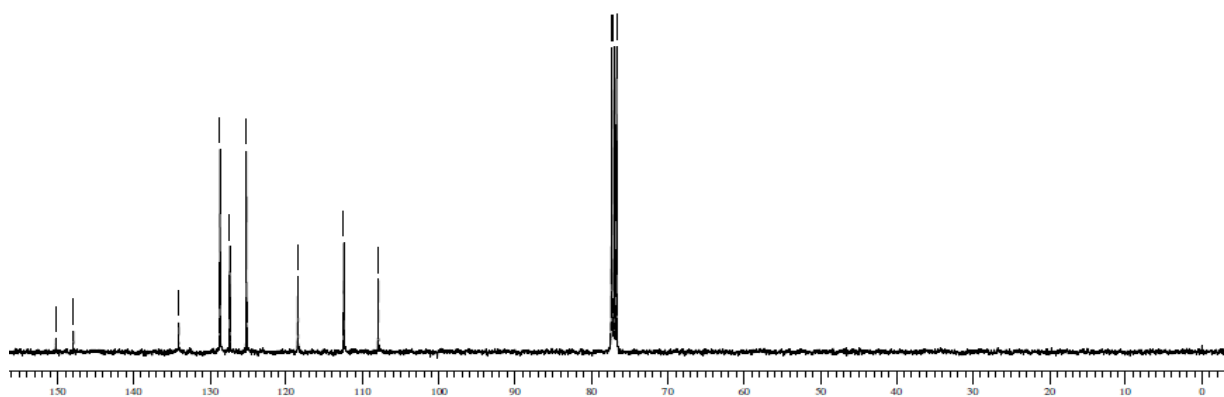

**HRMS (ESI)**



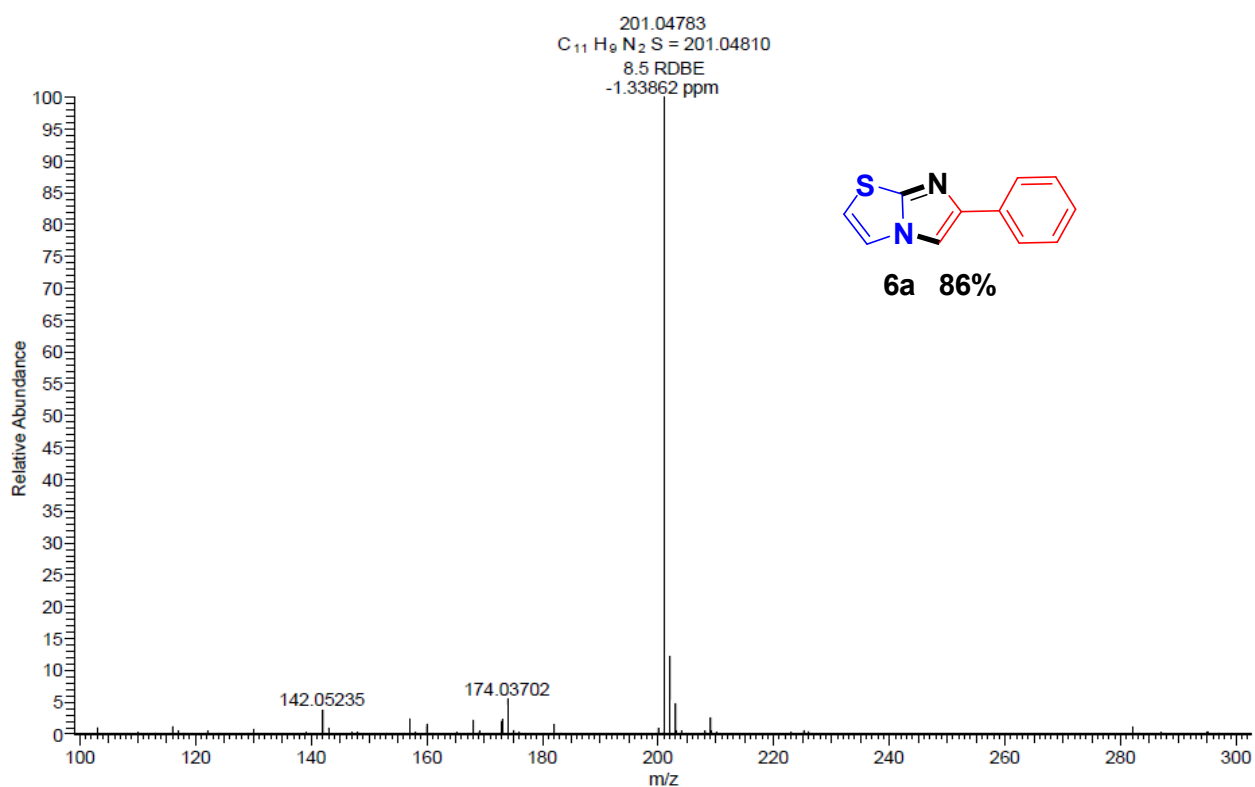

**Compound 6b**

**$^1H$  NMR (300 MHz,  $CDCl_3$ )**

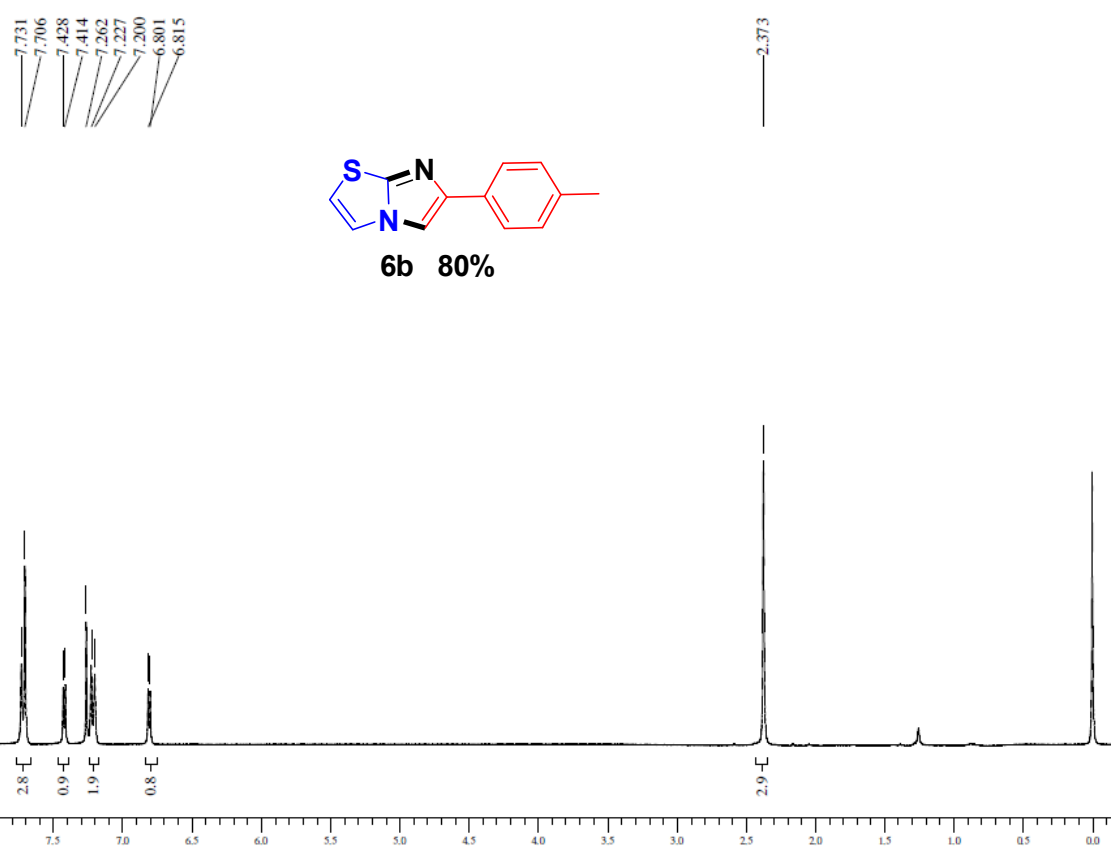

**$^{13}C$  NMR (75 MHz,  $CDCl_3$ )**

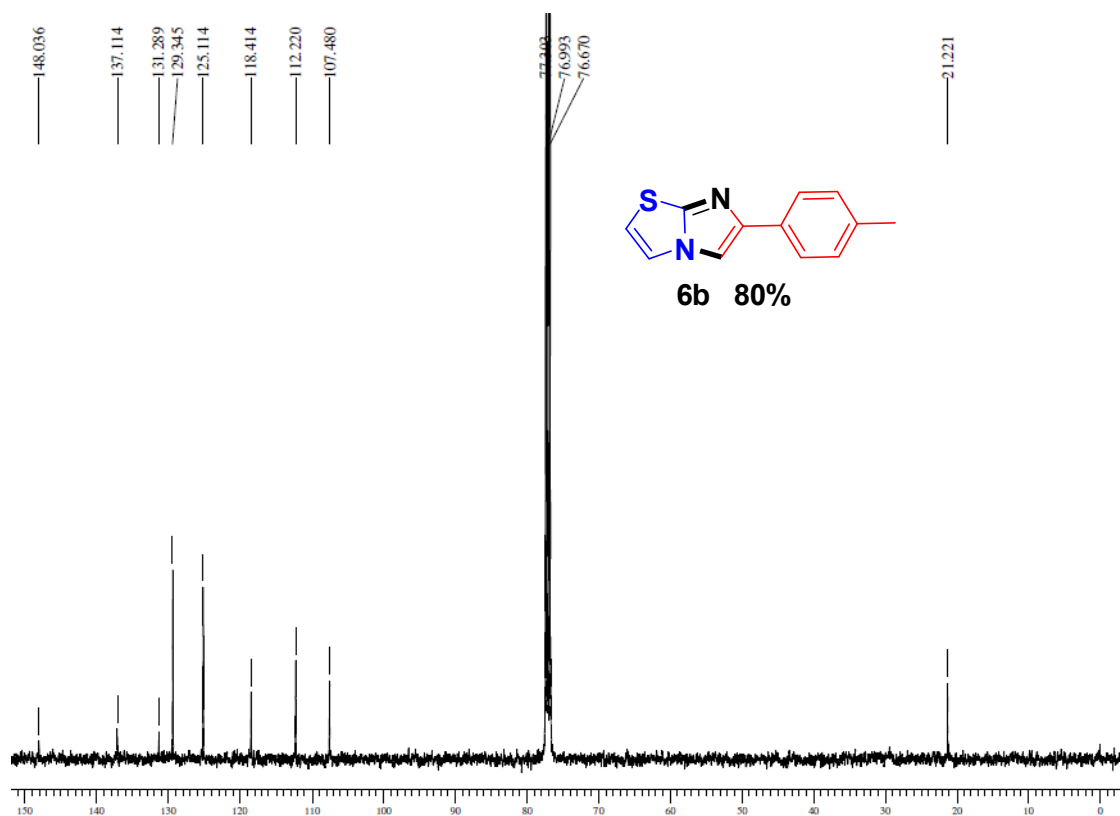

### HRMS (ESI)

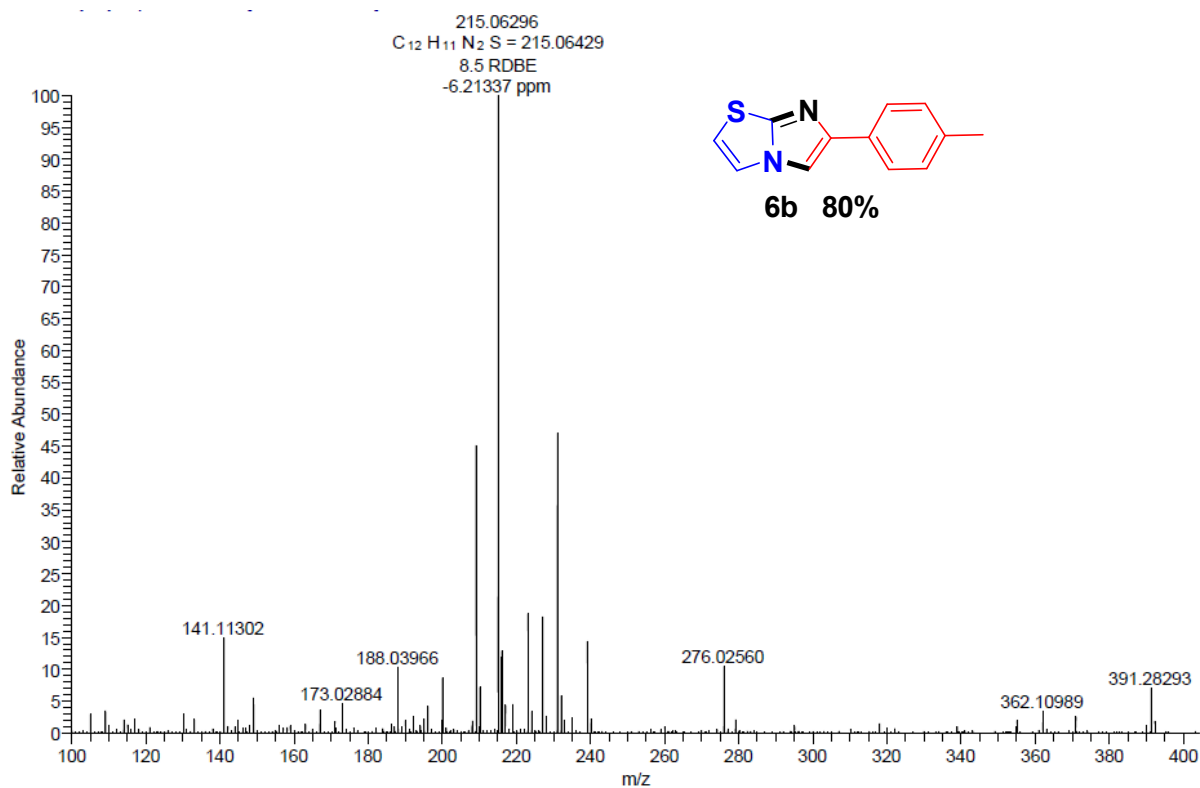

### Compound 6c

### <sup>1</sup>H NMR (300 MHz, CDCl<sub>3</sub>)

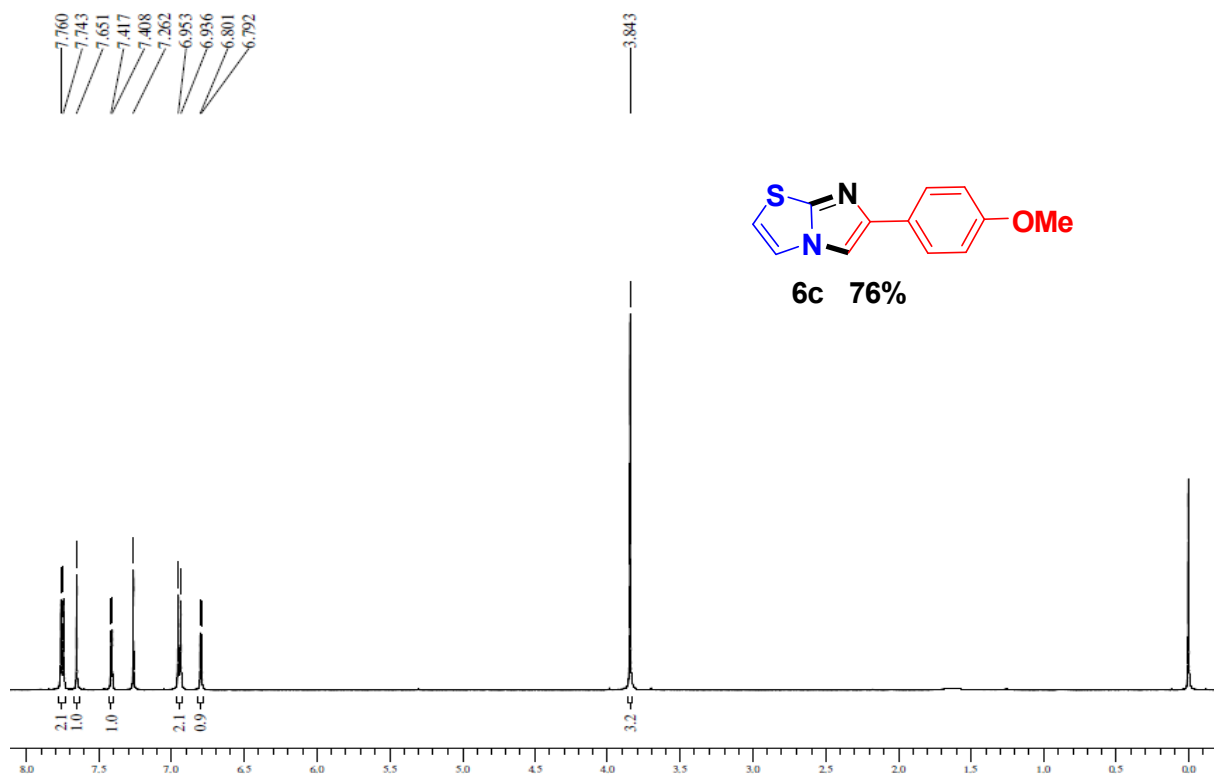

**$^{13}\text{C}$  NMR (75 MHz,  $\text{CDCl}_3$ )**

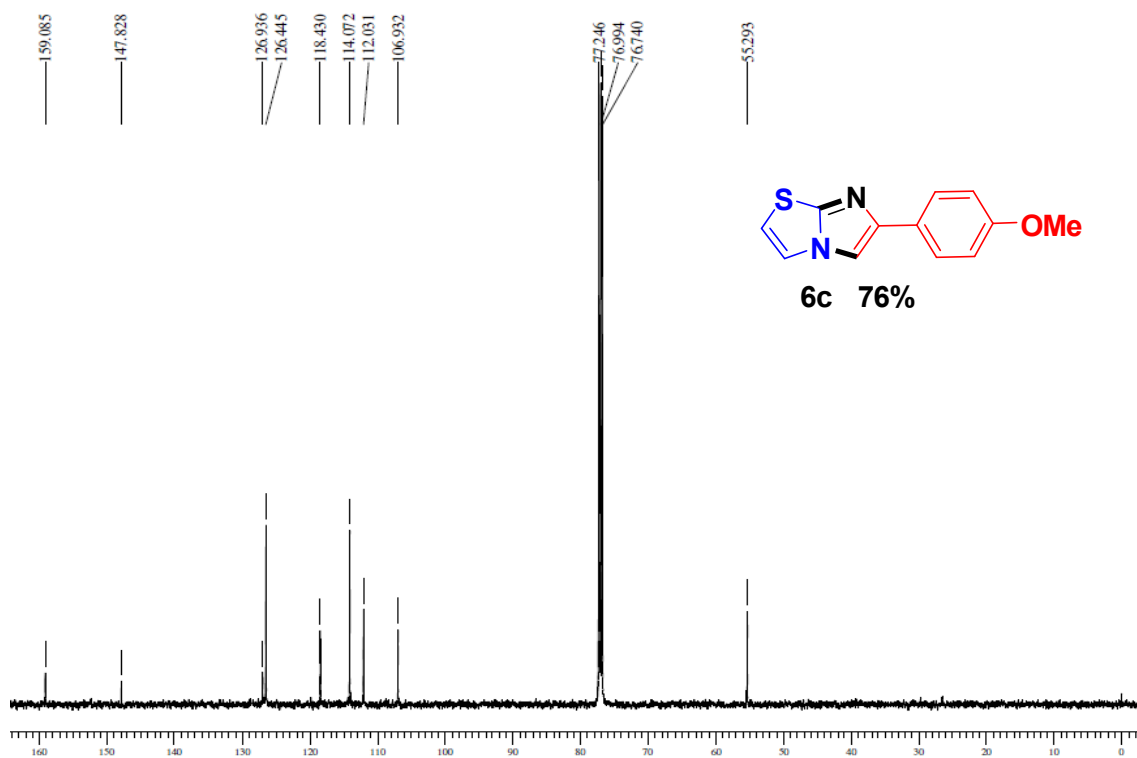

**HRMS (ESI)**

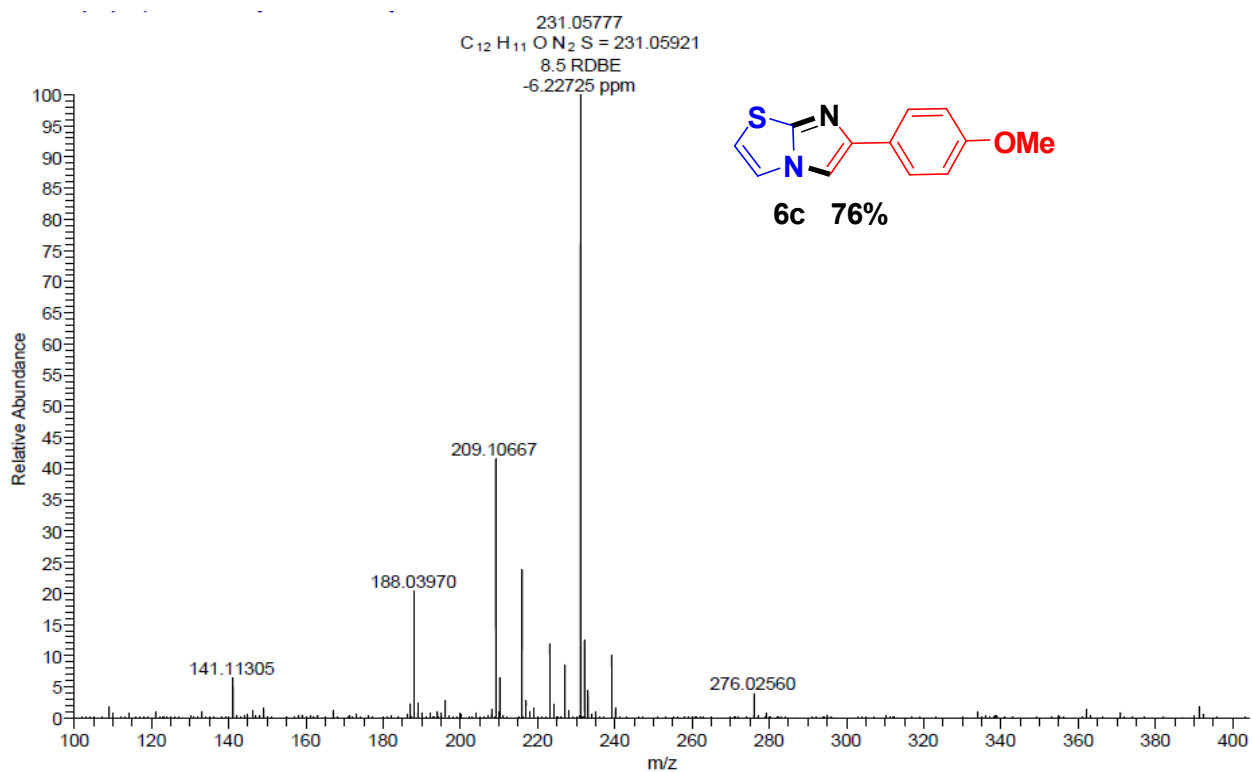

### Compound 6d

#### <sup>1</sup>H NMR (300 MHz, CDCl<sub>3</sub>)

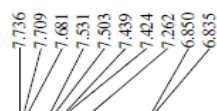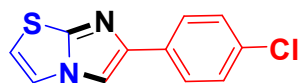

6d 88%

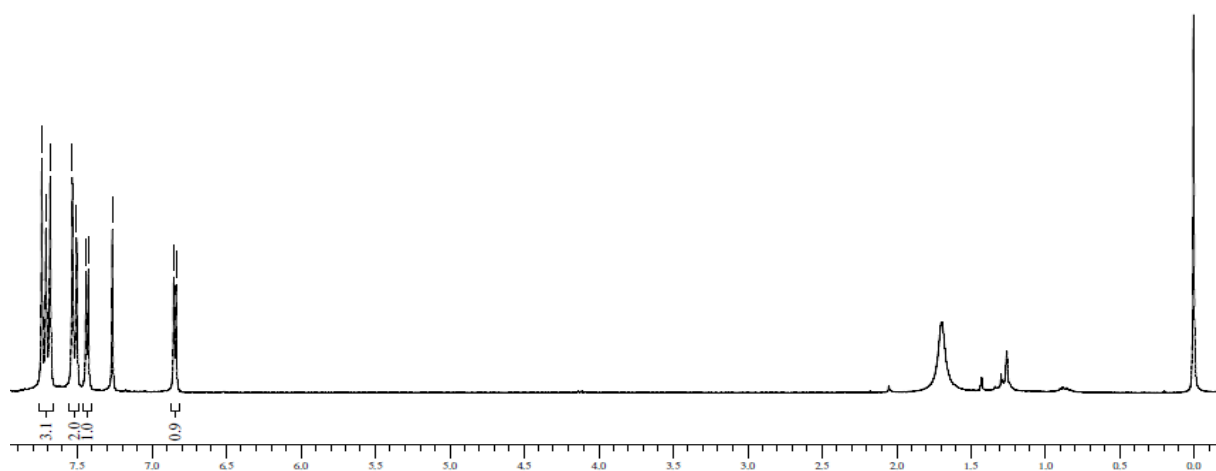

#### <sup>13</sup>C NMR (75 MHz, CDCl<sub>3</sub>)

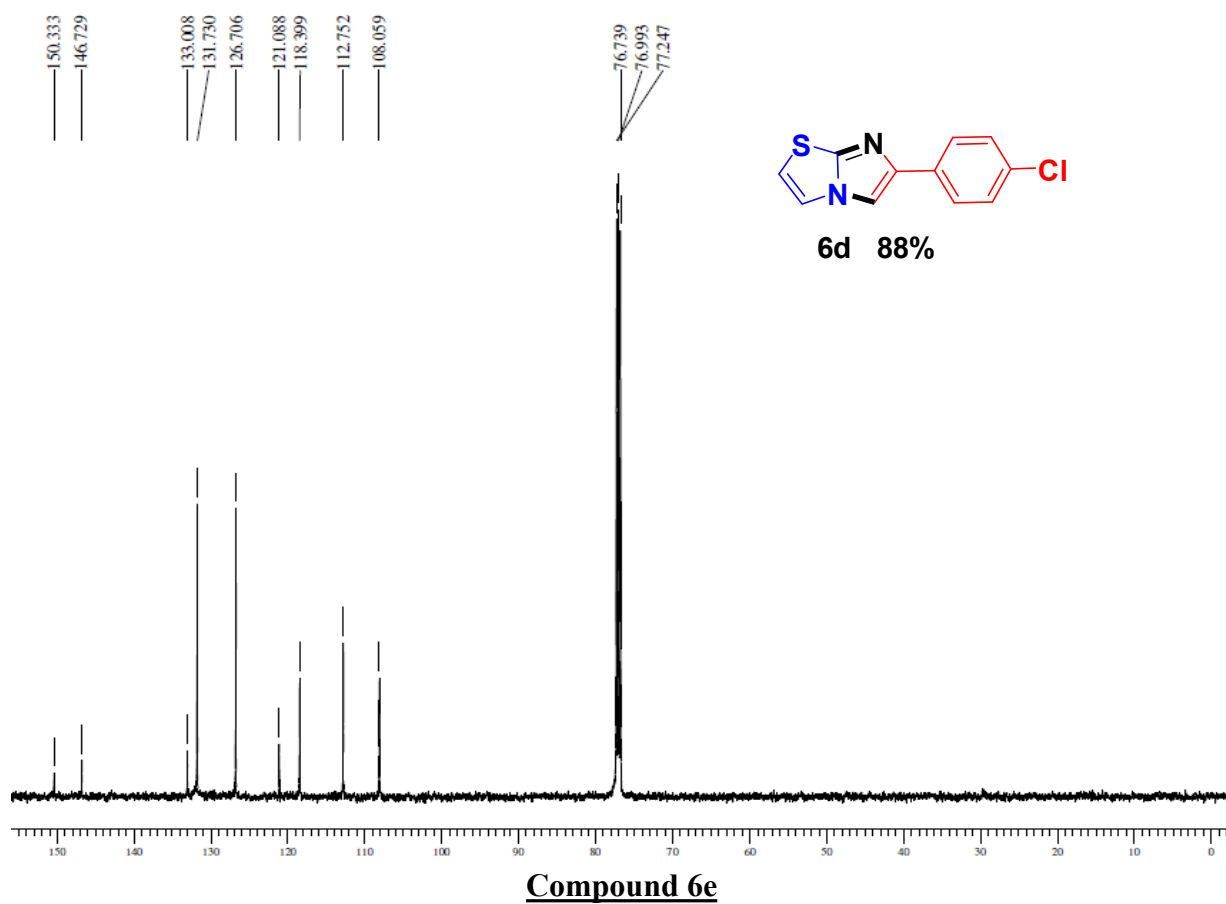

**<sup>1</sup>H NMR (300 MHz, CDCl<sub>3</sub>)**

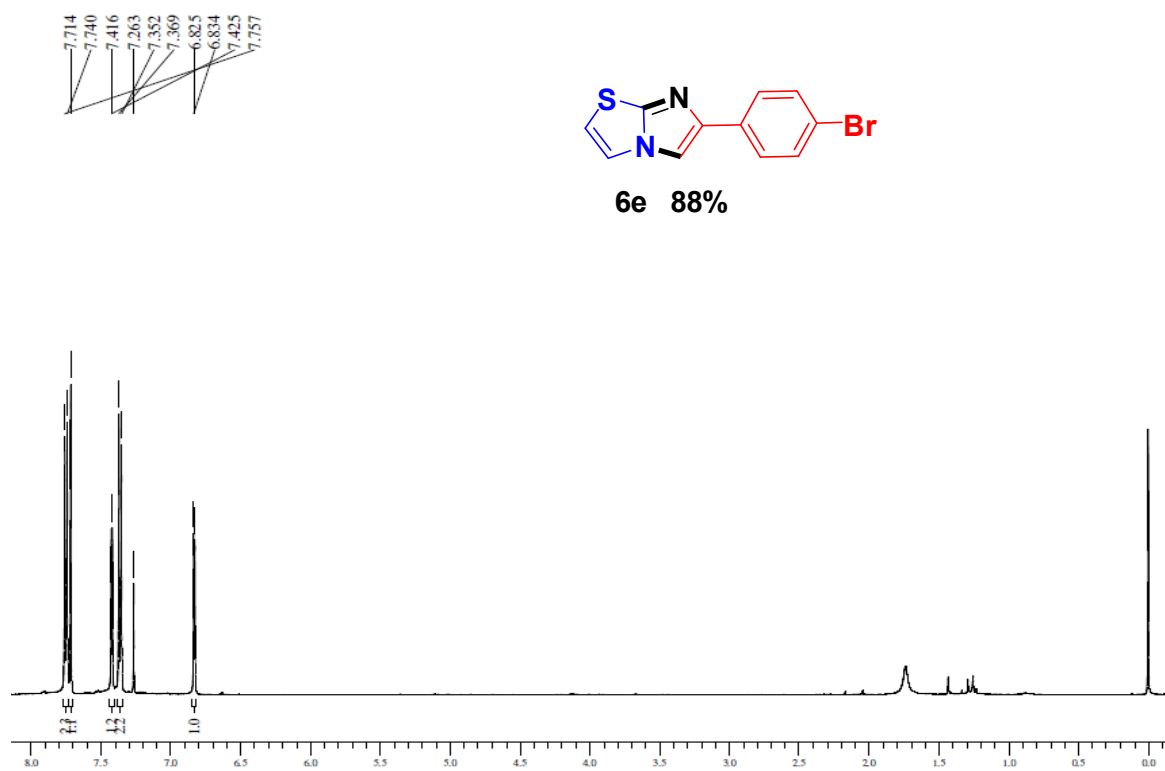

**$^{13}\text{C}$  NMR (75 MHz,  $\text{CDCl}_3$ )**

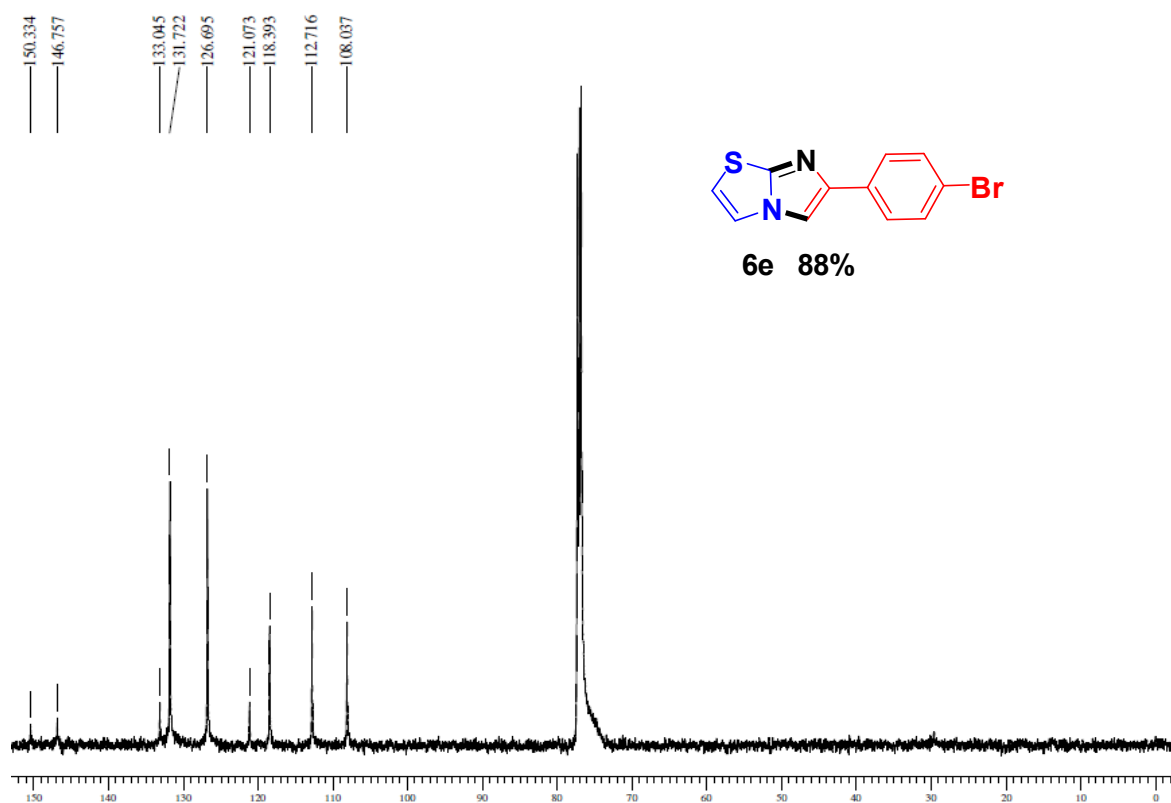

**Compound 6f**

**$^1\text{H}$  NMR (300 MHz,  $\text{CDCl}_3$ )**

7.896  
7.866  
7.864  
7.849  
7.847  
7.502  
7.484  
7.427  
7.412  
7.397  
7.400  
7.304  
7.302  
7.287  
7.272  
7.270  
7.274  
7.300  
7.258  
7.206  
7.201  
7.005  
7.010  
6.992  
6.987

3.865

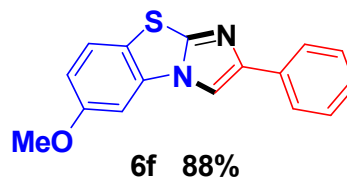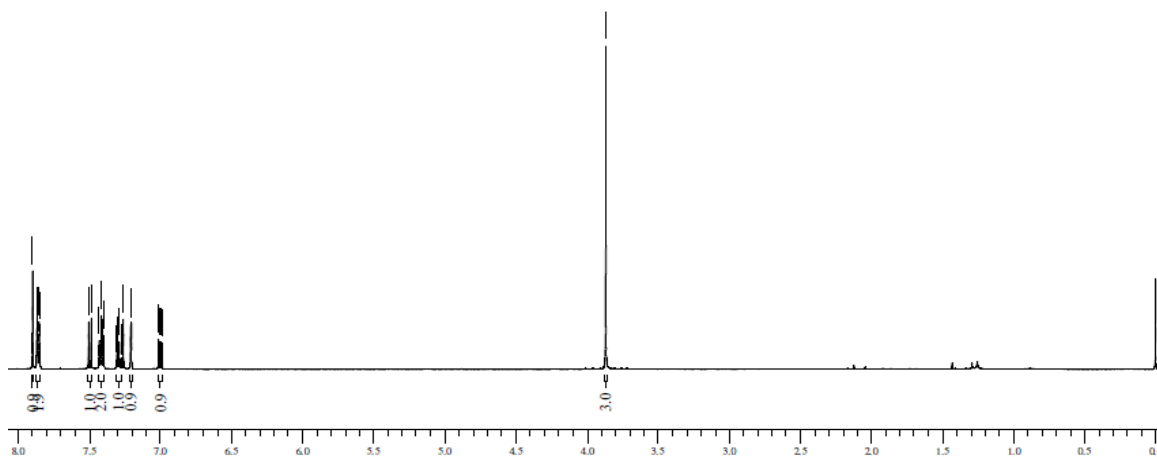

**<sup>13</sup>C NMR (75 MHz, CDCl<sub>3</sub>)**

157.143  
147.140  
147.416  
133.858  
131.422  
127.314  
125.007  
126.317  
128.659  
113.052  
113.316  
106.785  
108.668  
76.574  
76.997  
77.420  
55.872

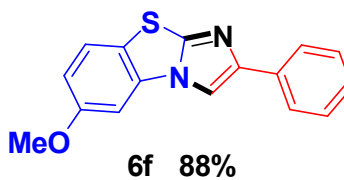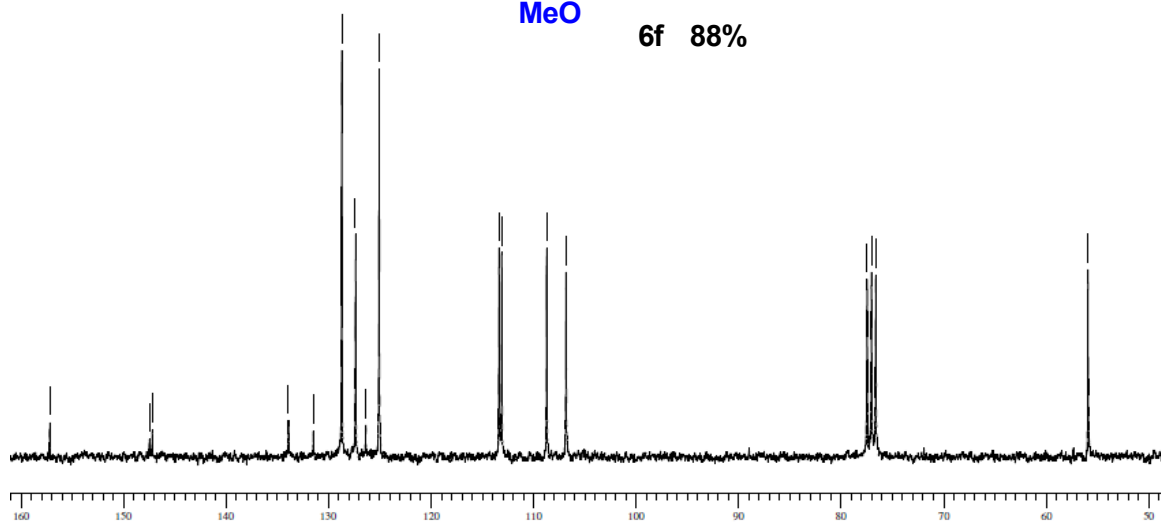

**HRMS (ESI)**

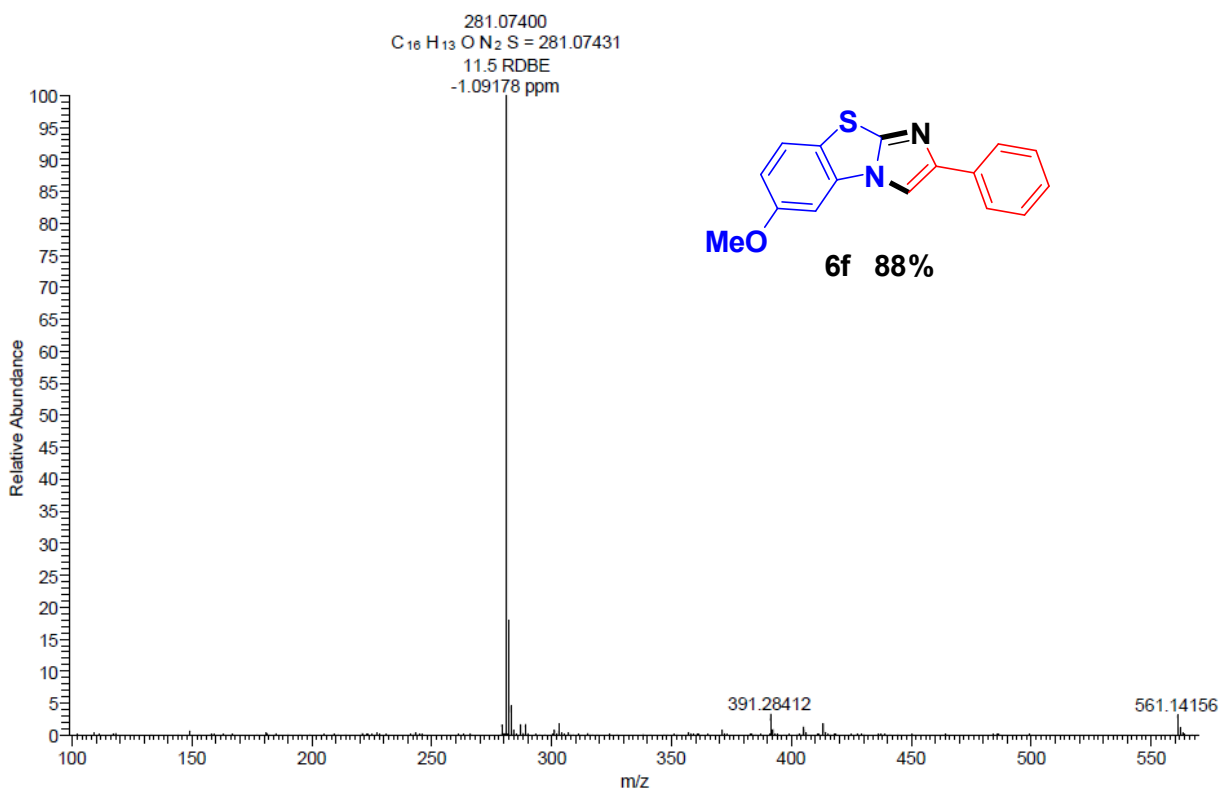

### Compound 6g

#### <sup>1</sup>H NMR (300 MHz, CDCl<sub>3</sub>)

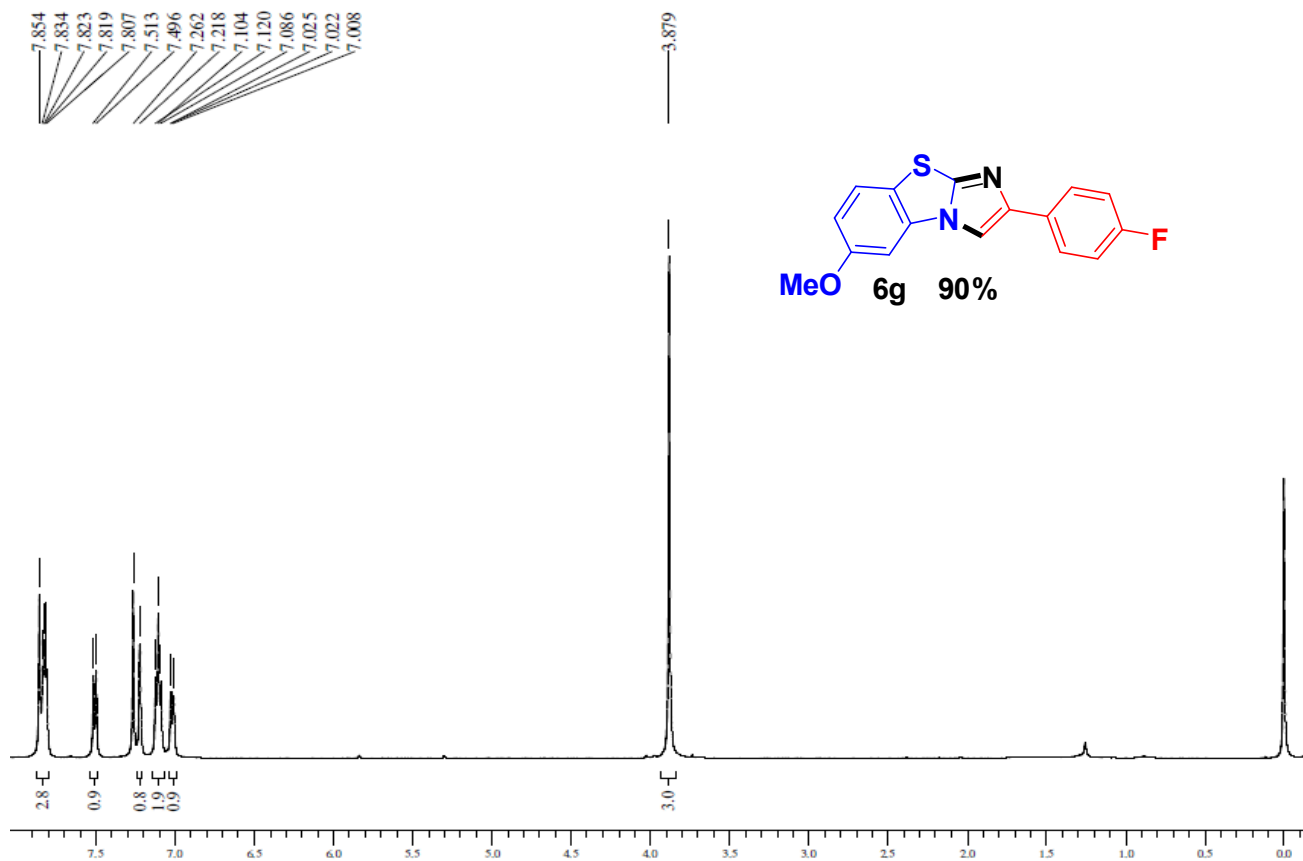



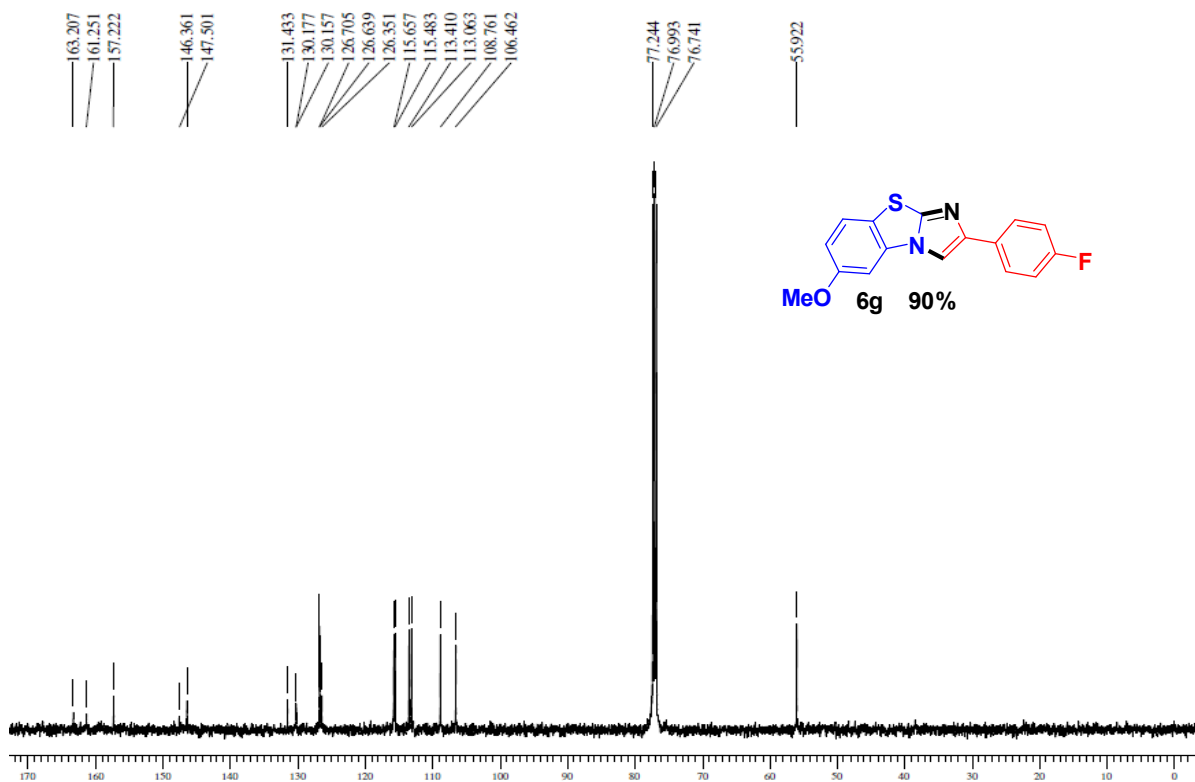

### HRMS (ESI)

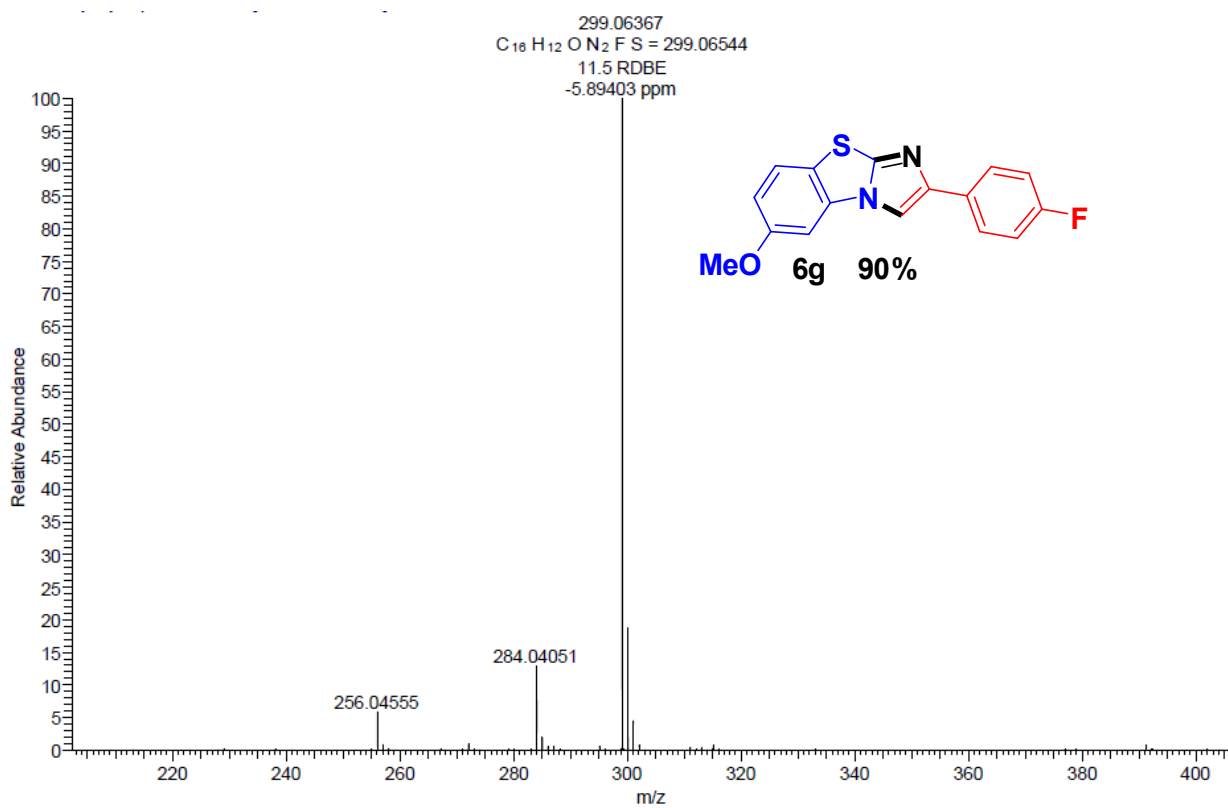

### Compound 6h

### <sup>1</sup>H NMR (300 MHz, CDCl<sub>3</sub>)

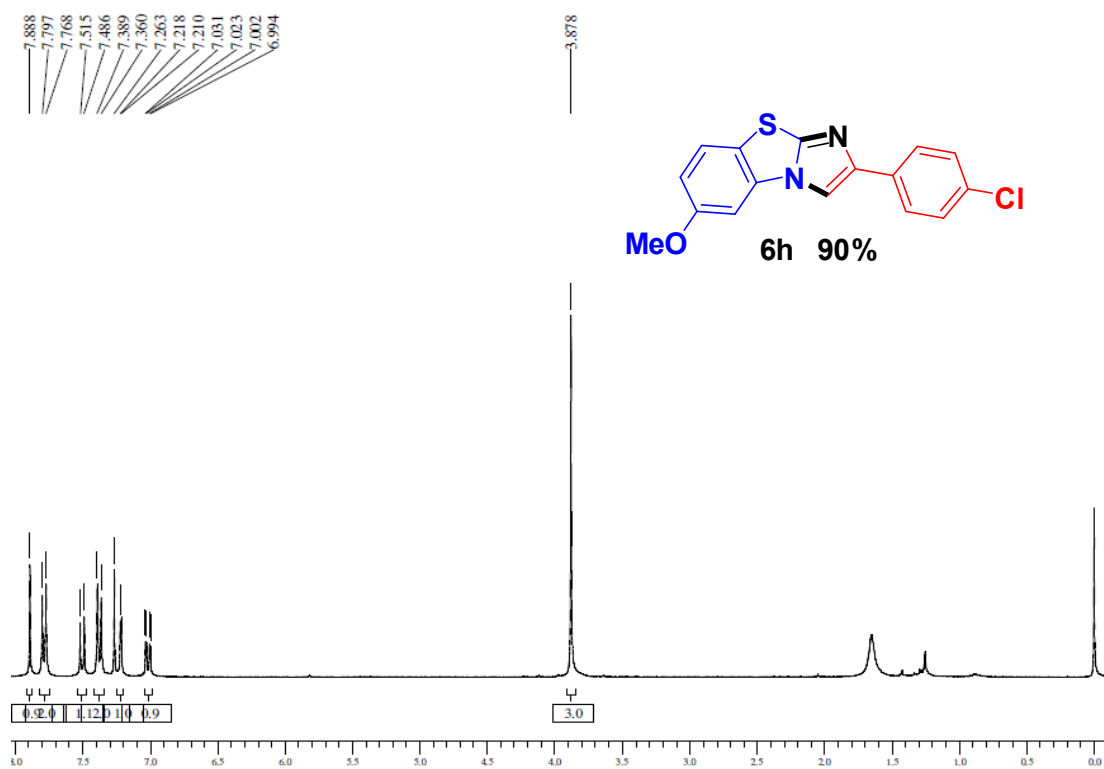

**<sup>13</sup>C NMR (75 MHz, CDCl<sub>3</sub>)**

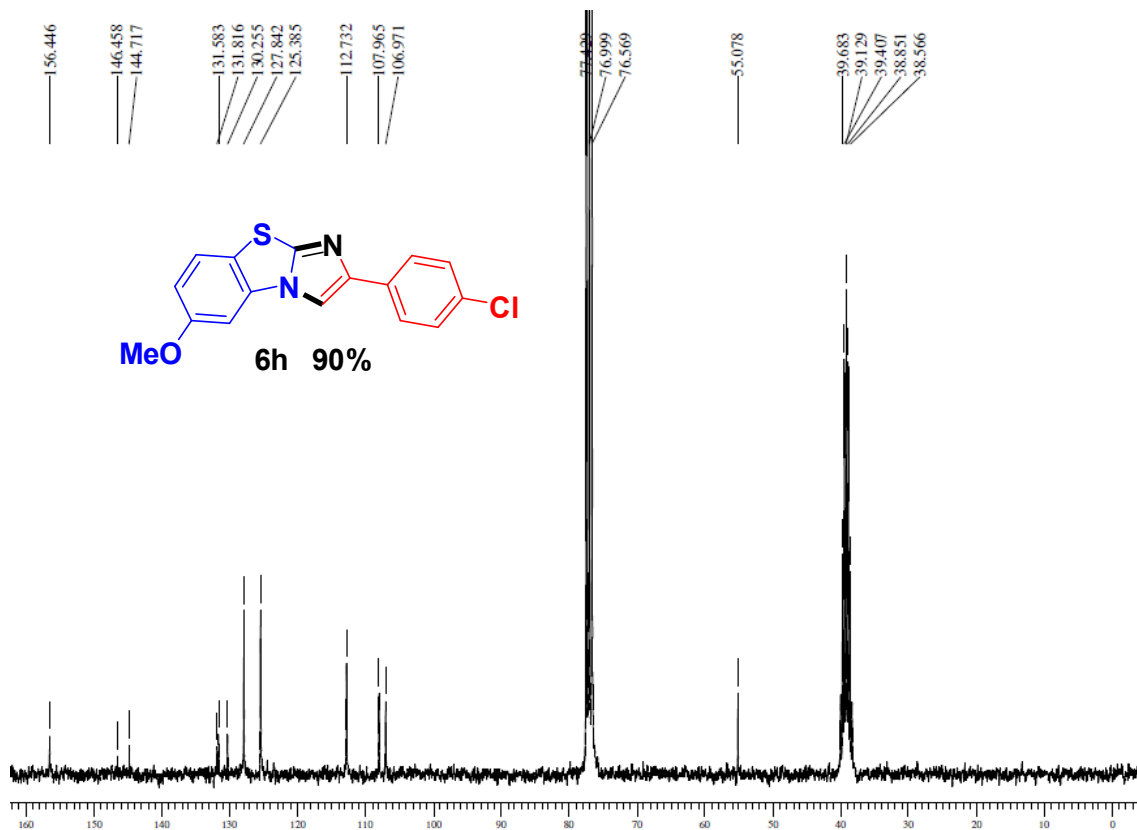

**HRMS (ESI)**

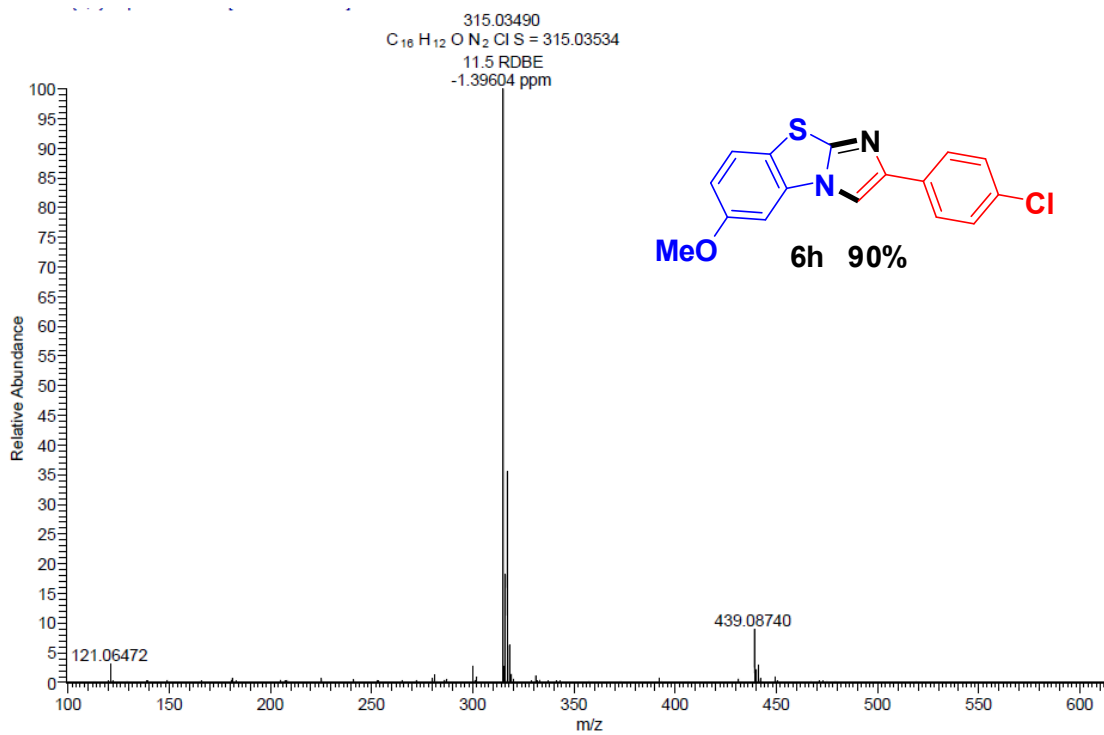

### Compound 6i

#### $^1H$ NMR (300 MHz, $CDCl_3$ )

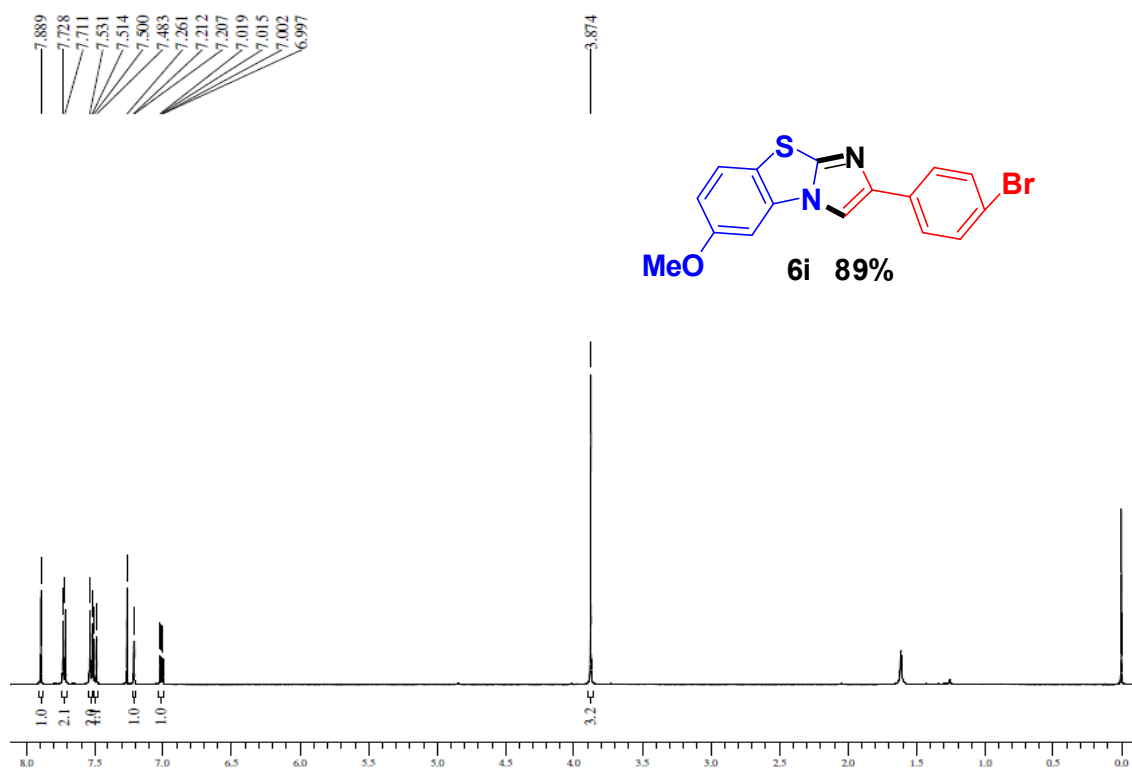

#### $^{13}C$ NMR (75 MHz, $CDCl_3$ )

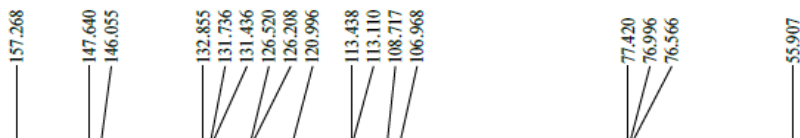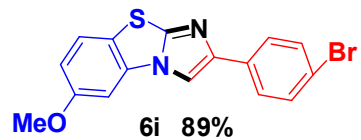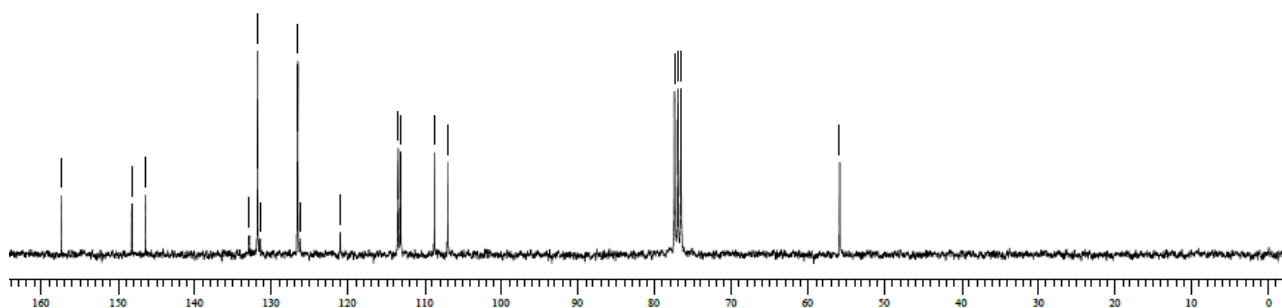

**HRMS (ESI)**

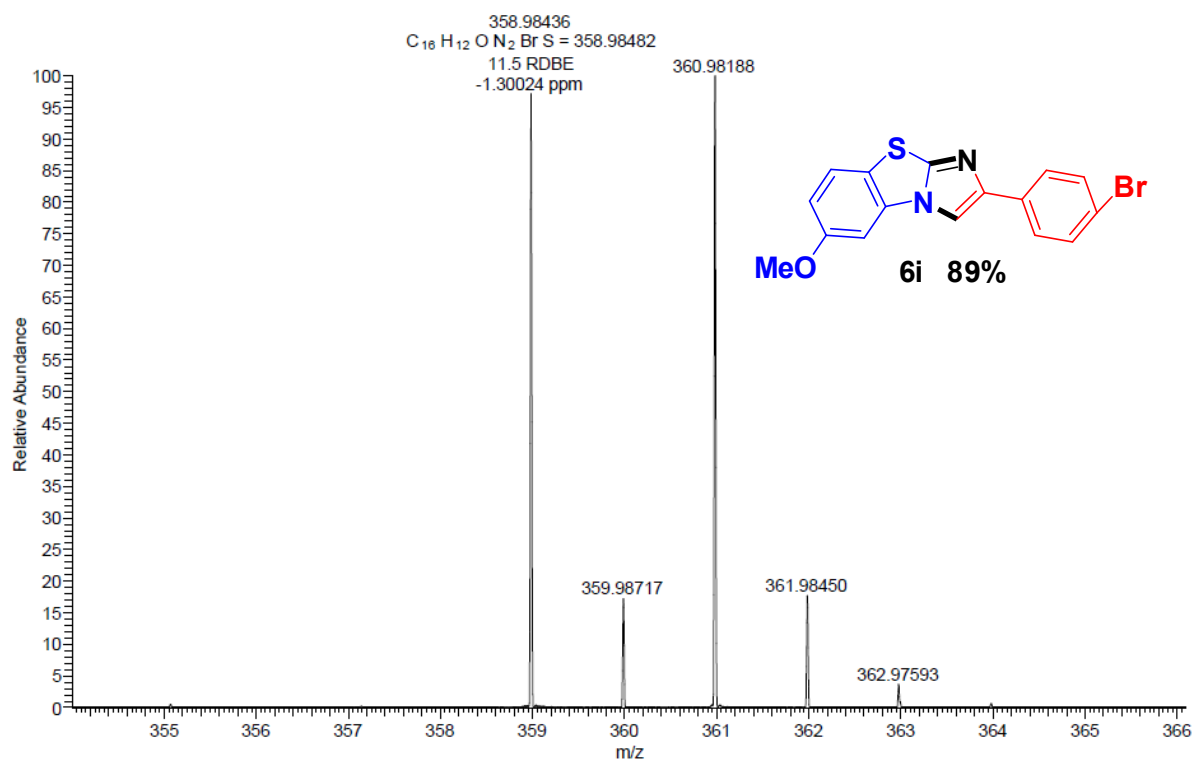

**Compound 6i**

**<sup>1</sup>H NMR (300 MHz, CDCl<sub>3</sub>)**

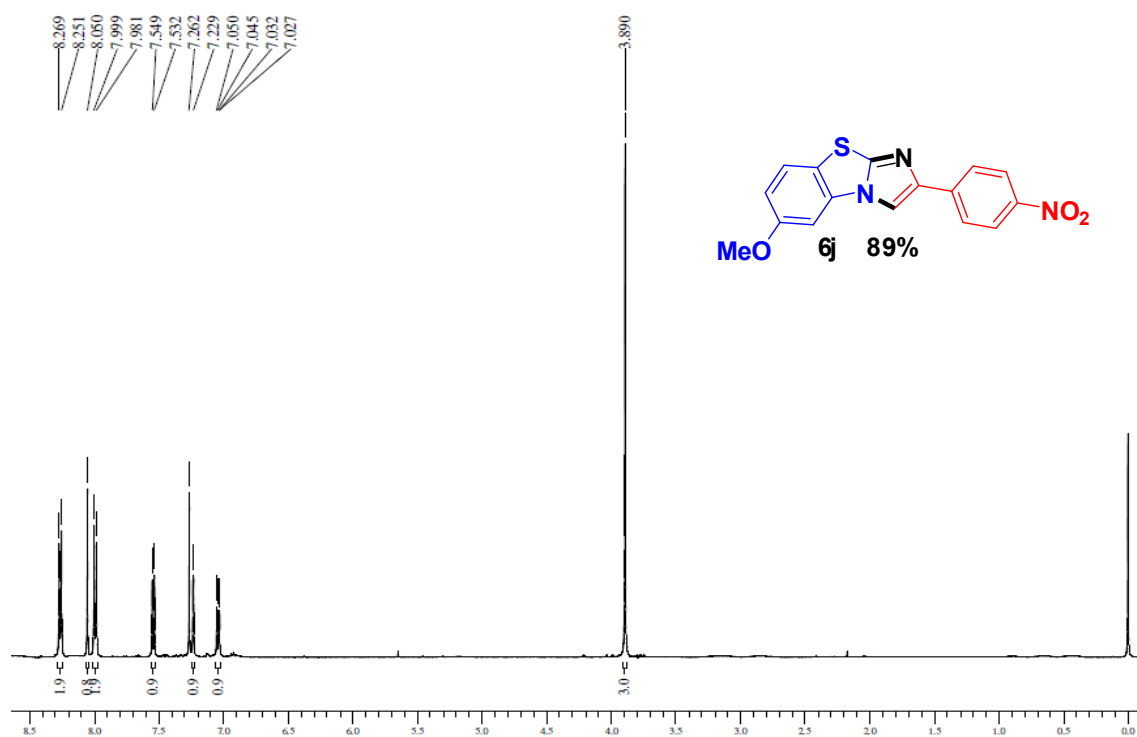

**<sup>13</sup>C NMR (75 MHz, CDCl<sub>3</sub>)**

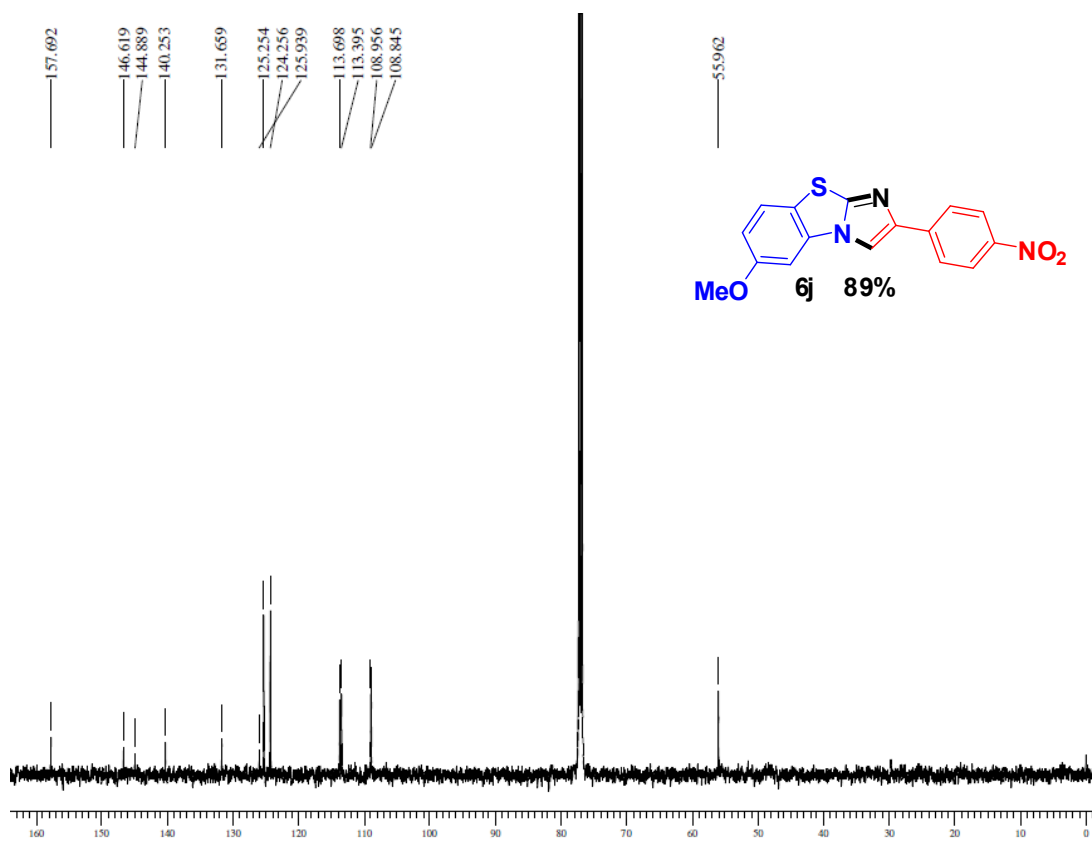

**HRMS (ESI)**

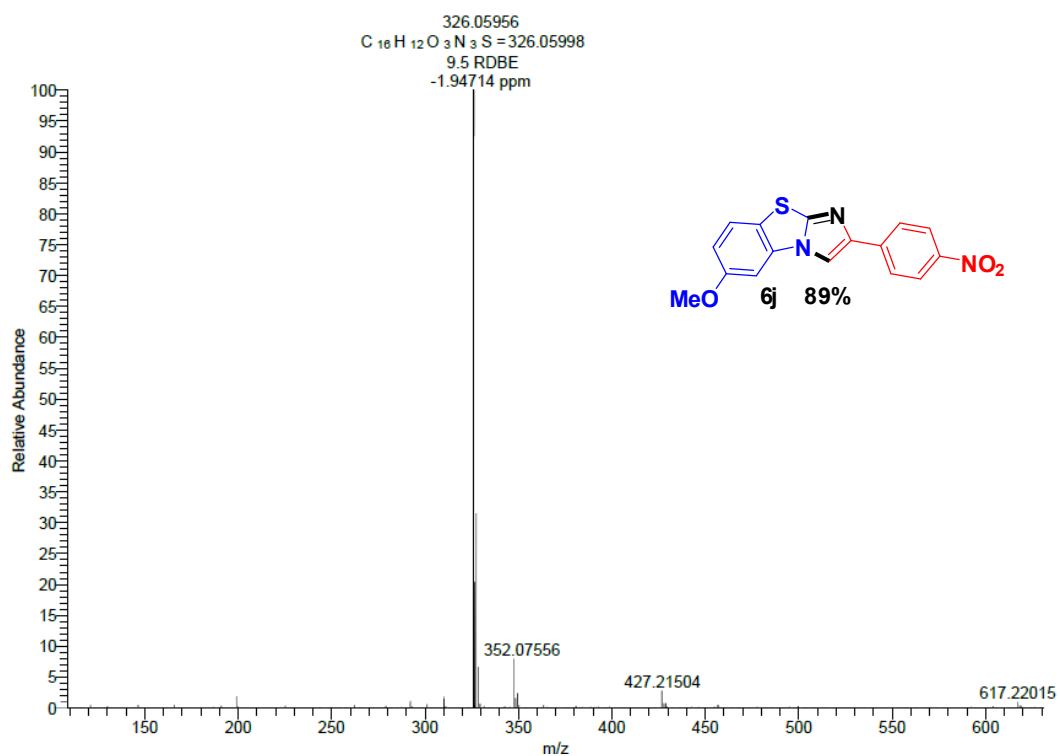

**Compound 6k**

**$^1H$  NMR (300 MHz,  $CDCl_3$ )**

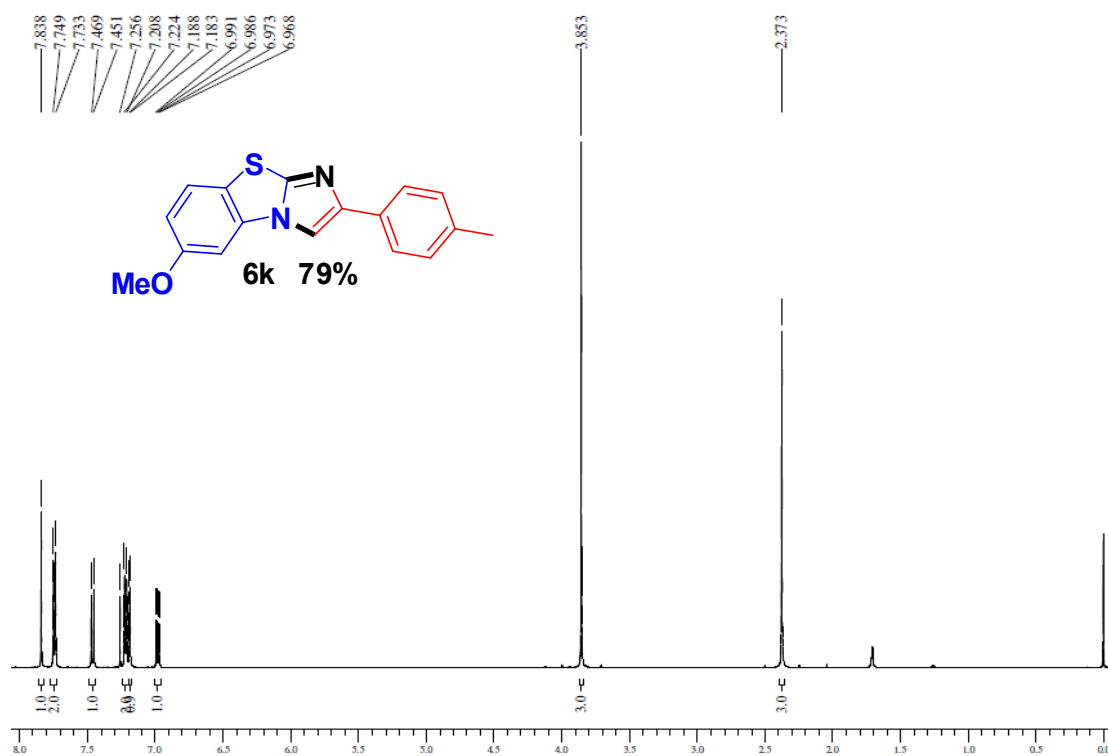

**$^{13}C$  NMR (75 MHz,  $CDCl_3$ )**

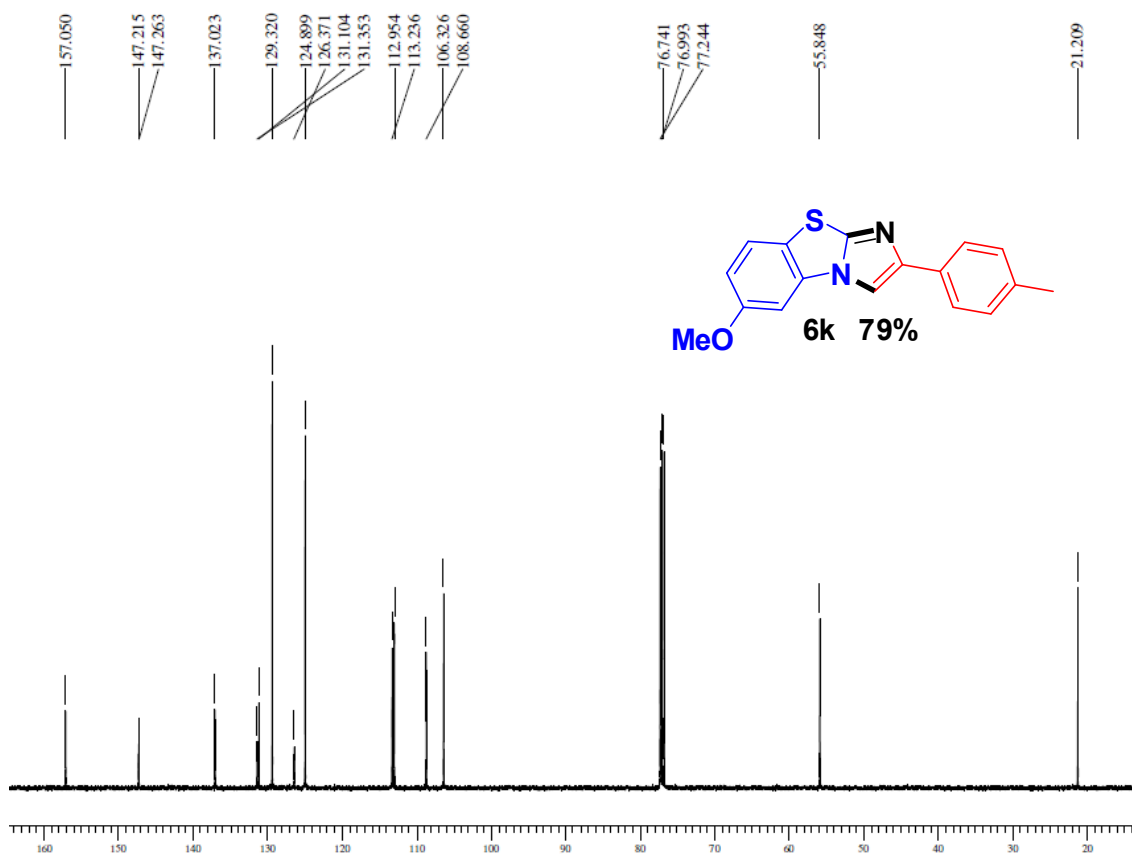

### HRMS (ESI)

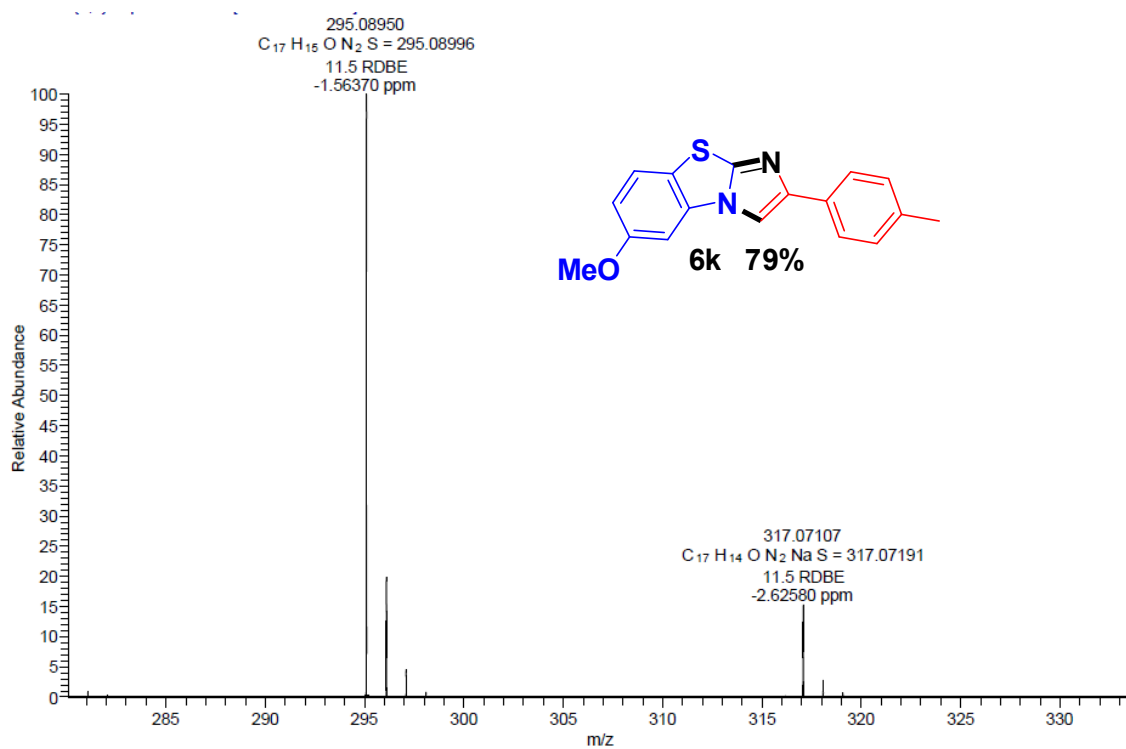

### Compound 6l

#### <sup>1</sup>H NMR (300 MHz, CDCl<sub>3</sub>)

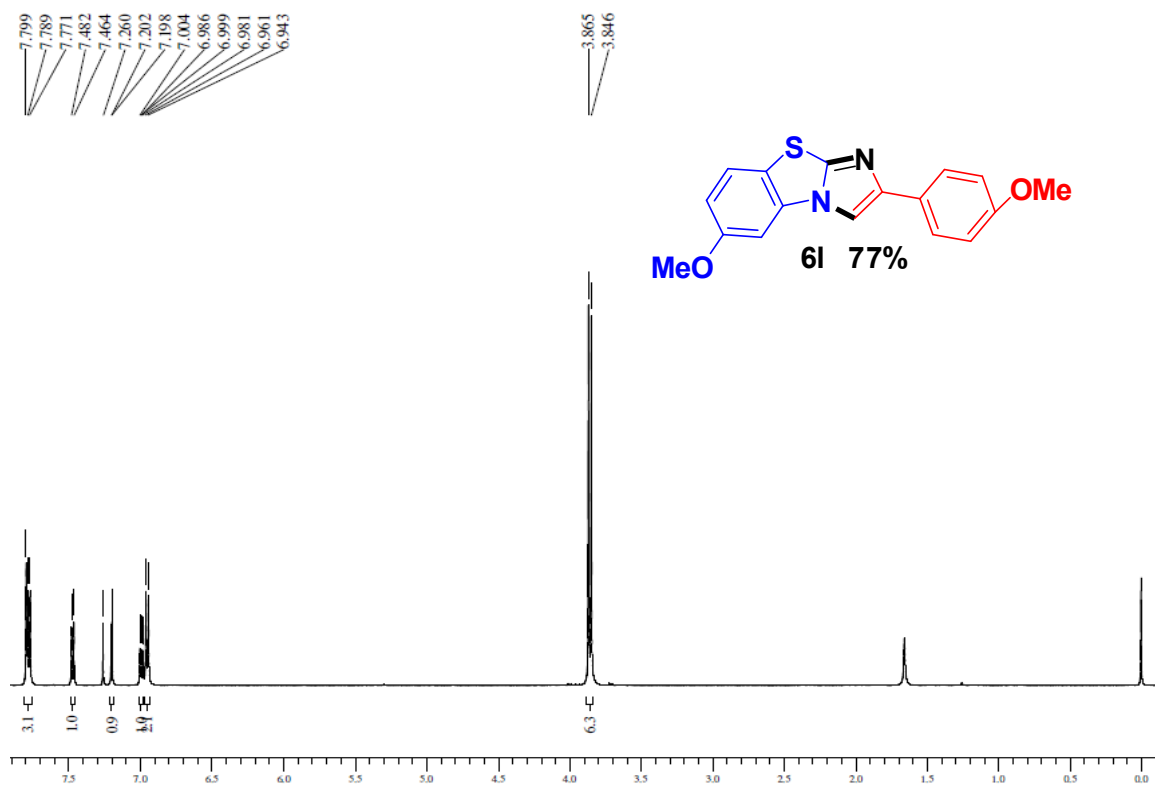

**<sup>13</sup>C NMR (75 MHz, CDCl<sub>3</sub>)**

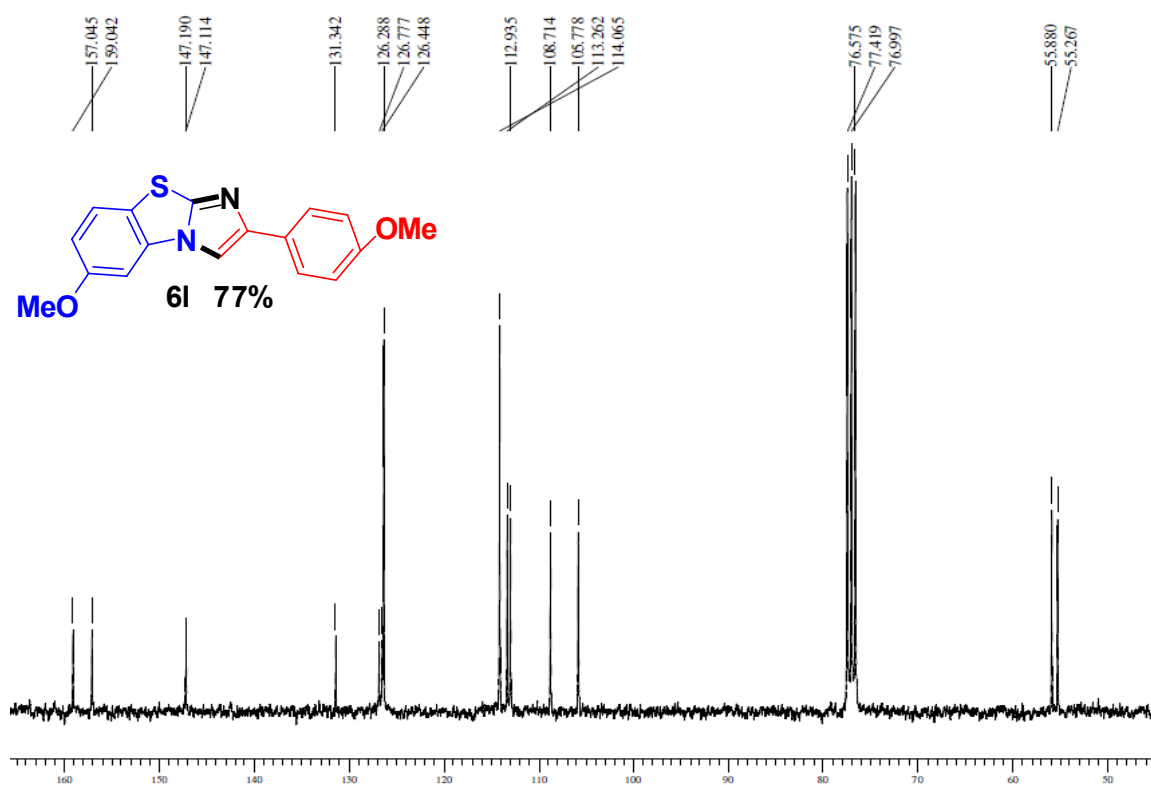

**HRMS (ESI)**



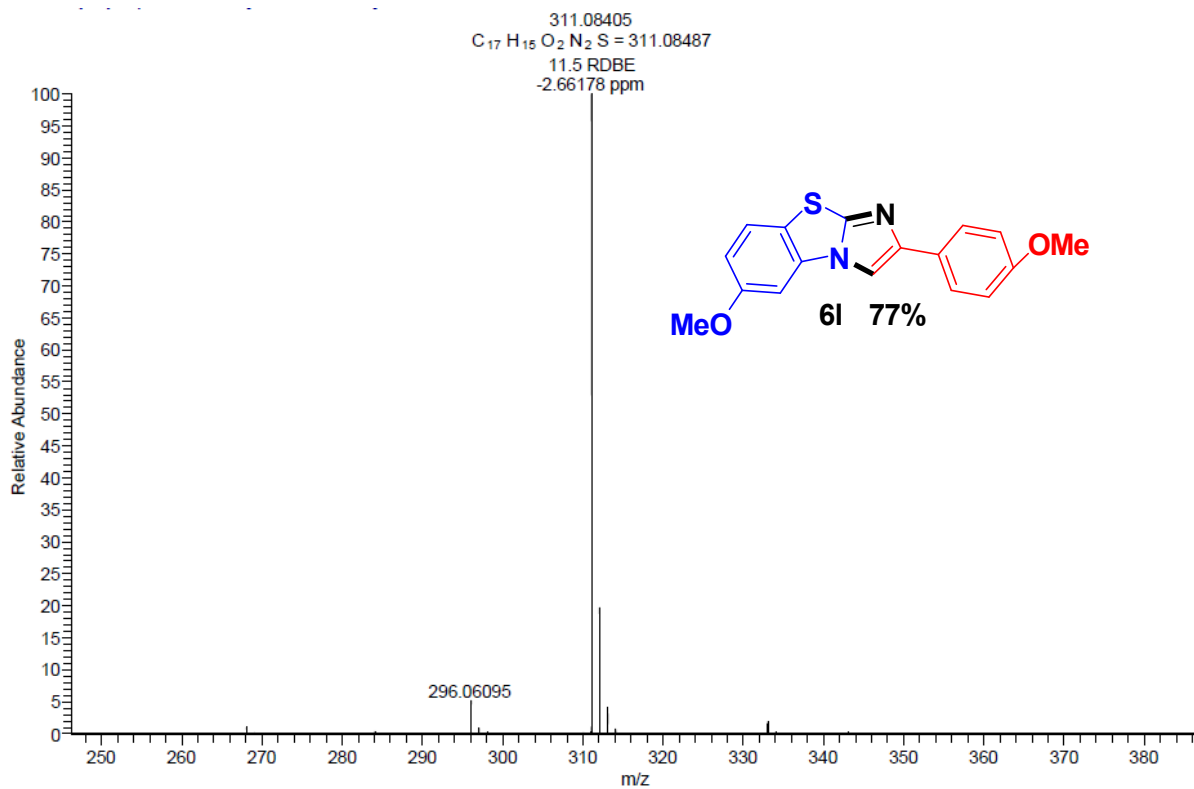

Supplement: c5ra09025c1.pdf [file c5ra09025c1.pdf]
